# Supplementary material for: Syntheses and biological evaluation of vinblastine congeners
Source: Royal Society of Chemistry journal article supplement (doi:10.1039/b209990j), 2003-01-01
Supplement: b209990j.doc [file b209990j.doc]

**Syntheses and Biological Evaluation of Vinblastine Congeners**

**Supplementary Material**

**Experimental Section**

**General Methods**: All reactions were carried out under a nitrogen or argon atmosphere. NMR spectra were obtained on Bruker 200, 250, 270 MHz or 500 MHz instruments. Chemical shifts are reported as parts per million ( values) relative to tetramethylsilane as the internal reference. Coupling constants are reported in Hertz (Hz). Mass spectra were obtained with a Finnegan 4610 quadrupole instrument at 70 eV, calibrated with perfluorotributylamine for compounds below MW 600 and tris(perfluorononyl)-s-triazine for higher MW compounds. Values are reported as mass to charge ratios (*m/z*) and relative abundance values are normalized to percent of base peak. IR spectra were obtained with a Nicolet 6000 FTA instrument. Principal absorptions are reported in reciprocal/centimeters (cm-1). Solid samples were prepared as KBr pellets while liquids were prepared as thin films using sodium chloride discs. UV spectra were recorded on Perkin Elmer 202 or 402 instruments and are reported in nanometers (nm). The samples were dissolved in ethanol and analyzed in a matched set of quartz cells.

TLC data were obtained with E. Merck 60F-254 precoated silica on aluminum sheets. Indole derivatives were characterized with a 10% ceric ammonium sulfate (CAS) in phosphoric acid as a spray reagent or by exposing the plate to iodine vapors and polyphosphomolybdic acid (PPMA) spray. For centrifugal chromatography, a Harrison Chromatotron was used with E. Merck 60 PF 254 silica gel with gypsum. For gravity column chromatography, 60-200 mesh Baker R3405 silica gel was used and for flash column chromatography 40 m Baker 7024-R silica gel was used. A preparative medium pressure liquid chromatographic system was also used. The system consisted of: (1) two 25 mm x 1000 mm glass columns and one 25 mm x 250 mm glass pre-column, (2) a 200 psi pressure gauge, (3) a Rheodyne Type 50 rotary valve equipped with a 10 cm3  siphon-manometer electrode assembly, and (4) a KNAUSER preparative differential-refractometer. Microanalyses were provided by Mr. George Robertson, Robertson Laboratories, Florham Park, NJ, or the successor Robertson Microlit Laboratory, Madison, NJ. All VLB 16’*S* congeners gave HRMS molecular ion peaks within 2 x 10-4% of calcd values.They were provided by Rockefeller Institute, Emory University, Yale University, and Washington University Mass Spectrometry facilities.

***For Scheme 2. Syntheses of 20'-Deoxy-20'-deethyl-20'S and R-methyl-vinblastine (10, 11)****.*

**2-Methyl--valerolactone**. To 16.61 cm3  of dry diisopropylamine (11.99 g, 0.1185 mol) in 60 cm3  of dry tetrahydrofuran, stirred at 0 oC under a nitrogen atmosphere, was added dropwise 74.06 cm3 of *n*-butyl lithium, 1.6 M in hexane (7.594 g, 0.1185 mol), with stirring over a period of one hour. Then the yellow solution was cooled to -78 oC and10.0 cm3 of-valerolactone (10.8 g, 0.108 mol) in 20 cm3 of dry tetrahydrofuran was added dropwise to the cooled reaction mixture over a period of 30 min, followed by dropwise addition of 6.72 cm3  of iodomethane (15.3 g; 0.108 mol) in 18.78 cm3  of doubly distilled hexamethylphosphoramide (19.35 g; 0.1080 mol) over a period of 40 min at -78 oC. After the addition, the mixture was stirred at -40 oC for 3 hr. The reaction was then quenched with a 300 cm3  solution of ammonium chloride and extracted with 3  100 cm3  portions of dichloromethane. The combined organic extracts were washed with 3 400 cm3  of distilled water and 300 cm3  of saturated sodium chloride. The yellow solution was then dried over (MgSO4) and concentrated to an orange viscous oil (bp = 45 oC/0.4 mm Hg). Column chromatography on silica gel, eluted with dichloromethane/petroleum ether/ethyl ether (5:5:1) produced 8.24 g of a yellow oil (66% - 77%). TLC (SiO2, CH2Cl2/petroleum ether/ethyl ether 5:5:1) *Rf* = 0.40 (yellow, PPMA); IR (neat, NaCl) max/cm-1 3528, 2970, 2940, 2908, 2876, 1740, 1736, 1462, 1380, 1256, 1242, 1158-1156, 1086-1084, 1028, 734; NMR (270 MHz, CDCl3) H1.24 (d, *J* 7, 3 H), 1.346-1.62 (m, 1 H), 1.88-1.98 (m, 2 H), 2.03-2.19 (m, 1 H), 2.52-2.69 (m, 1 H), 4.24-4.40 (m, 2 H); NMR (67.9 MHz, CDCl3) C15.7, 21.1, 26.1, 33.5, 67.5, 174.3; EIMS *m/z* 116 (5%), 115 (M+, 100), 112 (2), 111 (8), 110 (4), 109 (8), 107 (2), 99 (3), 98 (2), 97 (10), 96 (5), 95 (13), 93 (2), 85 (6), 84 (4), 83 (10), 82 (4), 81 (12), 79 (2), 71 (10), 70 (16), 69 (23), 67 (8), 58 (1), 57 (17), 55 (83).

**Methyl 2-Methyl-5-oxopentanoate**. To 2-methyl--valerolactone (7.8 g) in 5 cm3  of dry methanol, under nitrogen, was added 5 cm3 of conc. sulfuric acid. TLC(ethyl acetate/pentane, 2:3), indicated that methanolysis was completed in 45 min. The crude reaction mixture was worked up in the cold room to prevent ring closure. The mixture was neutralized with ca. 200 cm3  of sodium bicarbonate (basic pH). The organic layer was extracted with a minimal amount of dichloromethane and this crude alcohol solution was immediately used in the next step without concentration.

Pyridinium chlorochromate (1.5 equiv. with respect to the expected alcohol formation and an additional 1.2 equiv. for oxidation of the methanol from the previous procedure, total of 53.99 g) and 1.85 g of sodium acetate (0.333 equiv., 0.0226 mole) were pulverized and added to 80 cm3  of dry dichloromethane, followed by the above hydroxy ester solution. After 30 min some silica gel and ethyl ether were added and the mixture was poured onto a silica gel column, which was eluted with ethyl ether. The fractions containing the aldehyde (TLC, below) were combined and concentrated in vacuo. This oil was taken up in 50 cm3  of dichloromethane and washed with 3 x 30 cm3  of 1M hydrochloric acid and 3 x 30 cm3  of sodium bicarbonate. The organic fraction was dried over magnesium sulfate and concentrated to dryness. The crude oil was purified by a gravity column, eluted with ethyl acetate/pentane. A colorless oil was obtained after distillation (bp = 90-115 oC/0.6mm Hg). Yields ranged from 40% to 16%. TLC (SiO2, EtOAc/Pentane 3:2) *Rf* = 0.55 (blue, PPMA); IR (neat, NaCl) max/cm-13624, 3520, 3442, 2956-2954, 2726-2724, 1734-1732, 1464, 1436, 1378, 1204, 1170, 1082, 832, 762; NMR (270 MHz, CDCl3) H1.18 (d, *J* 7, 3 H), 1.72-1.85 (m, 3 H), 1.87-2.00 (m, 3 H), 2.51 (t, *J* 3, 2 H), 3.67 (sh.s, 3 H), 9.75 (sh.s, 1 H); NMR (67.9 MHz, CDCl3) C16.4, 25.4, 38.1, 40.9, 50.8, 175.5, 200.5; DEPT NMR C 16.5, 25.2, 38.1, 40.9, 50.7, 201.0; MS(EI) *m/z* 147 (1%), 146 (2), 144 ( M+, 27), 143 (12), 130 (7), 129 (100), 128 (27), 117 (0.3), 116 (3), 115 (24), 114 (10), 113 (61), 112 (20), 101 (11), 88 (54), 85 (34), 84 (31), 69 (50), 60 (2), 56 (59).

**Condensation of Indoloazepine 60 with Methyl 2-Methyl-5-oxopentanoate**.To 1.4 g of indoloazepine  **60** (5.8 mM) in 30 cm3  of dry methanol, 1.25 g of methyl 2-methyl-5-oxopentanoate (8.62 mM) in 10 cm3  of dry methanol was added. The reaction was stirred for 20 h and then concentrated under vacuum. The crude bridged azepine was purified on a gradient gravity column, starting with ethyl acetate/pentane (3:2). A viscous orange oil (2.25 g) was obtained with varied yields from 84% - 96%. Two pairs of the four isomers could be separated, thus giving a less polar pair and a more polar pair. Note that one could take the whole reaction mixture in one pot and proceed to the next reaction.

For the less polar pair: TLC (SiO2, EtOAc) *Rf* = 0.40 (blue with yellow center, CAS); UV (ethanol) max/nm 327, 298, 216, 205; IR (KBr) max/cm-1 3384-3382, 2954-2952, 2928, 2872, 1738-1736, 1682, 1610, 1466, 1378, 1288, 1244, 1190, 744; MS (EI) *m/z* 372 (1%), 371 (8), 370 (M+, 34), 356 (3), 339 (5), 338 (3), 284 (3), 283 (14), 228 (5), 227 (7), 215 (20), 214 (100), 202 (3), 195 (7), 183 (2), 182 (9), 170 (5), 168 (12), 167 (10), 166 (4), 157 (2), 156 (19), 155 (10), 154 (38), 153 (4), 142 (4), 141 (6), 140 (4), 129 (3), 128 (7), 127 (10), 125 (4), 124 (4), 115 (4), 111 (6), 96 (12), 88 (4), 86 (5), 84 (13), 77 (3), 69 (6), 68 (6), 59 (5), 57 (7), 56 (5), 55 (7), 51 (5).

For the more polar pair: TLC (SiO2, EtOAc) *Rf* = 0.11 (blue with yellow center, CAS); UV (ethanol) max/nm 327, 299, 222, 204; IR (KBr) max/cm-1 3386-3384, 3054, 2972-2970, 2950, 2866, 1734, 1682, 1610, 1466, 1436, 1374, 1294, 1188-1186, 1050, 996, 940, 878, 748, 736; MS (EI) *m/z* 373 (1.0%), 372 (6), 371 (28), 370 (M+, 61), 339 (7), 311 (2), 299 (3), 284 (6), 283 (32), 270 (2), 256 (3), 255 (3), 229 (2), 228 (5), 227 (4), 216 (3), 215 (21), 214 (100), 195 (6), 182 (19), 170 (7), 169 (6), 168 (19), 167 (15), 166 (7), 157 (5), 156 (39), 155 (17), 154 (73), 144 (4), 143 (5), 141 (7), 140 (5), 129 (5), 128 (13), 127 (18), 125 (4), 124 (7), 112 (2), 111 (6), 110 (3), 97 (4), 96 (23), 86 (6), 84 (12), 69 (7), 68 (10), 59 (8), 51 (5).

**4,2'-PREF and 4,2’-PARF Methyl 3-Benzyl-1,2,3,3a,4,5-hexahydro-4[2-(methoxycarbonyl)propyl]-7H-pyrrolo(2,3-d)carbazole-6-carboxylate (62)**. To a mixture of 2.25 g (6.21 mM) of the above bridged indoloazepines in 50 cm3  of dry tetrahydrofuran, benzyl bromide (0.98 cm3  , 8.21 mM) was added with stirring and the mixture was heated at reflux for two days. The rearranged product was already being formed from the salt produced in this reaction. The crude mixture was concentrated and then taken up in 50 cm3  of dry methanol. Dry triethylamine (3.64 cm3  , 0.0262 mol) was added to the stirring solution and the mixture heated at reflux for 10 h. At this time, complete rearrangement took place. Concentration to dryness and column chromatography on silica gel, eluted with ethyl acetate/pentane (1:1), gave a yellow oil with varying yields of 85% - 90%. TLC *Rf =*  0.46 showed no separation of diastereomers (SiO2, EtOAc/Pen 2:3, CAS blue).

For the less polar product (initial eluate): UV (EtOH) max/nm328, 299, 207; IR (KBr) max/cm-1 3374, 3080, 3058, 3028, 2952, 2926, 2868, 2854, 2796, 1740, 1736, 1680, 1610, 1496, 1478, 1466, 1436, 1376, 1344, 1294, 1280, 1248, 1204, 1136, 1050, 988, 746, 700 cm-1; MS (EI) *m/z* 462 (0.2%), 461 (1), 460 (M+, 5), 429 (2), 401 (1), 373 (2), 332 (3), 328 (7), 327 (29), 301 (5), 294 (2), 284 (2), 277 (2), 261 (3), 260 (2), 248 (3), 247 (13), 246 (76), 232 (2), 228 (2), 227 (4), 221 (1), 215 (1), 214 (3), 207 (2), 206 (2), 195 (3), 194 (4), 193 (2), 182 (2), 181 (3), 180 (5), 169 (2), 168 (5), 167 (7), 156 (2), 155 (2), 154 (6), 134 (3), 129 (4), 128 (2), 92 (9), 91 (100), 59 (4).

For the more polar product (late eluate): UV (EtOH) max/nm329, 299, 204; IR (KBr) max/cm-1 3376-3374, 3086, 3060-3058, 3028, 2958-2956, 2926, 2870, 2856, 2798-2794, 1742, 1682, 1610, 1496, 1480, 1466, 1436, 1372, 1344, 1296-1294, 1280, 1242, 1204, 1166, 1048, 988, 746, 700; MS (EI) *m/z* 461 (3%), 460 (M+, 11), 429 (4), 373 (5), 341 (5), 332 (4), 328 (9), 327 (42), 301 (6), 294 (3), 261 (5), 260 (7), 247 (16), 246 (100), 238 (4), 228 (2), 227 (4), 214 (3), 210 (2), 209 (3), 195 (2.6), 194 (5), 181 (3), 180 (7), 169 (3), 168 (6), 167 (8), 166 (2), 154 (7), 134 (2), 92 (7), 91 (95), 65 (3), 59 (2).

**4,2'-PREF and 4,2’-PARF Methyl 3-Benzyl-1,2,3,3a,4,5-hexahydro-4[2-(hydroxymethyl)propyl]-7H-pyrrolo(2,3-d)carbazole-6-carboxylate**.Lithium aluminum hydride (5.63 cm3  , 5.63 mM, of a 1 M solution in tetrahydrofuran) was added dropwise over a period of 10 min to a stirring solution of 2.68 g (5.63 mM) of the above diesters in 50 cm3  of dry tetrahydrofuran at 0 oC. After 15 min, the reaction was completed and the yellow solution was poured into a stirring solution of 10 cm3  of conc. ammonium hydroxide solution. Some distilled water was added and the solution was extracted many times with dichloromethane. The organic extracts were dried over magnesium sulfate and concentrated to an orange-brown, viscous oil. The crude alcohols were separated by low pressure chromatography on silica gel with ether/triethyl amine (9:1), to give 0.78 g of the 4,2’ PARF and 0.60 g of the 4,2’ PREF alcohols. The yield of the alcohol mixture was 55%.

For the less polar (4,2’ PARF) alcohol: TLC (SiO2, Ether/Et3N 9:1) *Rf* = 0.47 ( blue with a yellow center, CAS); UV (EtOH) max/nm328, 290, 284, 220, 204; IR (KBr) max/cm-1 3383, 2923, 1733, 1609, 1457, 1249, 1176, 1033, 745, 666; NMR (270 MHz, CDCl3) H0.95-0.64 (m, 2 H), 0.82 (d, *J* 7, 3 H), 1.25 (t, *J* 7, 1 H), 1.52 (ddd, *J* 13, 1 H), 1.67 (dd, *J* 12, 1 H), 1.91 (dt, *J*  7, 1 H), 2.04 (ddd, *J* 12, 1 H), 2.58 (dd, *J*  6, 1 H), 2.66 (dt, *J* 10, 1 H), 2.97- 2.92 ( m, 2 H), 3.22 ( dd, *J*  11, 1 H), 3.36 ( dd, *J*  11, 1 H), 3.77 (s, 3 H), 4.08 (d, *J* 13, 1 H), 6.81 (d, *J*  8, 1 H), 6.83 (t, *J*  8, 1 H), 7.01 (d, *J* 7, 1 H), 7.14 (ddd, *J*  8, 1 H), 7.46-7.25 (m, 5 H), 8.93 (br.s, 1 H); NMR (67.9 MHz, CDCl3, from DEPT: CH2 underlined, quat. C *) C17.5, 23.1, 32.9, 34.7, 36.3, 42.1, 50.4, 55.0*, 58.0, 67.2, 72.0, 90.5*, 108.9, 120.2, 121.8, (125.0), 126.7, 127.4, 127.9, 128.6, 137.7*, 138.9*, 142.8*, 164.8*, 168.6*; MS (EI) *m/z* 434 (1%), 433 (7), 432 (M+, 25), 373 (5), 340 (4), 332 (5), 300 (8), 299 (32), 281 (3), 273 (6), 241 (5), 238 (5), 227 (6), 219 (14), 218 (79), 115 (3), 206 (3), 195 (3), 194 (4), 180 (5), 169 (3), 168 (7), 167 (9), 166 (3), 155 (3), 154 (8), 134 (3), 130 (4), 111 (5), 106 (9), 105 (12), 92 (11), 91 (100), 88 (3), 86 (5), 85 (5), 84 (8), 83 (4), 77 (9), 73 (4), 71 (6), 70 (9), 69 (8), 68 (4), 65 (6), 61 (13), 57 (12), 56 (5), 55 (15), 51 (10).

For the more polar (4,2’ PREF) alcohol: TLC (SiO2, Ether/Et3N 9:1) *Rf* = 0.33 (blue with yellow center, CAS); UV (EtOH) max/nm328, 297, 220, 203; IR (Kbr) max/cm-1 3398, 3370, 2924, 1609, 1466 , 1293, 1247, 1103, 746, 666; NMR (270 Mhz, CDCl3) H 0.50 (ddd, *J* 16, 1 H), 0.80 (d, *J* 7, 3 H), 0.99 (ddd, *J* 14, 1 H), 1.26 (s, 1 H), 1.57-1.28 (m, 1 H), 1.67 (dd, *J* 12, 1 H), 1.96 -1.91 (m, 1 H), 2.06 (ddd, *J* 12, 8, 1 H), 2.48 (dd, *J* 15, 1 H), 2.64 (d, *J* 16, 1 H), 2.68 (ddd, *J* 12, 8, 1 H), 2.88 (s, 1 H), 2.96 (dd, *J* 9, 1 H), 3.25 (dd, *J* 2, 2 H), 3.76 (s, 3 H), 3.80 (d, *J* 16, 1 H), 4.09 (d, *J* 13, 1 H), 6.81 (d, *J* 8, 1 H), 6.83 (t, *J* 8, 1 H), 6.97 (d, *J* 7, 1 H), 7.14 (t, *J* 8, 1 H), 7.42-7.25 (m, 5 H), 8.92 (s, 1 H); NMR (67.9 MHz, CDCl3, from DEPT: CH2 underlined, quat. C *)) C15.9, 21.5, 32.9, 33.9, 36.0, 41.9, 50.5, 50.6, 55.1*, 58.2, 68.2, 72.5, 90.2*, 109.0, 120.2, 121.9, 126.8, 127.5, 128.0, 128.7, 137.7*, 138.8*, 142.8*, 164.7*, 168.7*; MS (EI) *m/z* 434 (0.6%), 433 (4), 432 (M+, 17), 401 (2), 373 (5), 332 (5), 300 (7), 299 (31), 273 (6), 266 (3), 261 (2), 241 (5), 227 (5), 220 (2), 219 (17), 218 (100), 209 (2), 206 (2), 204 (2), 194 (4), 180 (4), 168 (6), 167 (8), 166 (2), 155 (2), 154 (5), 129 (3), 106 (4), 105 (6), 92 (6), 91 (78), 88 (3), 86 (20), 84 (27), 77 (4), 71 (4), 65 (3), 61 (2), 58 (11), 57 (6, 56 (3), 55 (7), 51 (16).

**4,2’-PARF Methyl 3-Benzyl-1,2,3,3a,4,5-hexahydro-4[2-(*p-*tosyloxymethyl)propyl]-7H-pyrrolo(2,3-d)carbazole-6-carboxylate (63a)**.To the above less polar alcohol (1.00 g, 0.0023 mol), stirred in 100 cm3  of dry dichloromethane at 0 oC, triethylamine (0.484 cm3  , 0.0035 mol) was added all at once, followed by *p*-toluenesulphonic anhydride (1.133 g; 0.0035 mol) over a period of 10 min. After 1 h, TLC indicated partial product formation. An additional 0.15 equiv. of triethyl amine and *p-*toluenesulphonic anhydride were added at 0 oC, the mixture was stirred for two more hours and then poured over 100 cm3  of 10% ammonium hydroxide in saturated brine. Extraction with 3  50 cm3  portions of dichloromethane, drying over magnesium sulfate, concentration and chromatography on silica gel with ethyl acetate/ pentane (1:9) gave 0.84 g of tosylate (62%) and 0.31 g of unreacted alcohol.

TLC (SiO2, EtOAc/Hexane 1:1) *Rf* = 0.39 (blue with yellow center, CAS); UV (EtOH) max/nm333, 324, 299, 222, 199; IR (KBr) max/cm-1 3381, 3364, 3353, 2953, 2926, 1677, 1609, 1466, 1359, 1249, 1176, 1099, 965, 814, 748, 667, 555; NMR (270 MHz, CDCl3) H0.70-0.85 (m, 2 H), 0.77 (d, *J* 6 , 3 H), 1.75-1.58 (m, 2 H), 1.89 -1.80 (m, 1 H), 2.01 (ddd, *J* 12 , 1 H), 2.39 (s, 3 H), 2.50 (br.s, 2 H), 2.68-2.55 (m, 1 H), 2.83 (s, 1 H), 2.91 (t, *J* 8, 1 H), 3.83-3.64 (m, 3 H), 3.76 (s, 3 H), 4.02 (d, *J* 13, 1 H), 6.81 (d, *J* 8, 1 H), 6.88-6.80 (m, 1 H), 7.00 (d, *J* 8, 1 H), 7.15 (t, *J* 8, 1 H), 7.44-7.20 (m, 6 H), 7.69 (d, *J* 8, 2 H), 8.91 (br.s, 1 H); NMR (67.9 MHz, CDCl3, from DEPT: CH2 underlined, quat. C *) C17.5, 17.5, 21.3, 22.7, 30.3, 30.4 (*), 34.3, 36.3, 42.2, 50.6, 50.7, 55.2*, 58.2, 72.0, 72.1(*), 74.2, 90.3(*), 109.1, 120.6, 122.1, 125.2(*), 127.0, 127.7, 128.1(*), 128.2, 128.9(*), 129.6, 137.7*, 138.9*, 142.9*, 144.3*, 164.9*, 168.6*; MS (EI) *m/z* 587 (0.03%), 586 (M+, 0.08), 555 (0.07), 527 (0.2), 495 (0.2), 464 (0.1), 456 (0.2), 455 (0.9), 454 (3), 453 (11), 427 (3), 374 (8), 373 (24), 372 (100), 360 (2), 333 (2), 332 (9), 281 (3), 262 (3), 261 (11), 260 (2), 248 (2), 240 (2), 238 (7), 236 (2), 228 (4), 227 (4), 222 (2), 221 (3), 220 (2), 214 (4), 209 (4), 208 (4), 207 (4), 206 (4), 200 (10), 195 (5), 194 (7), 182 (4), 180 (7), 169 (4), 168 (7), 167 (9), 155 (6), 154 (7), 149 (7), 133 (5), 110 (5), 105 (5), 92 (6), 91 (56), 86 (9), 71 (7), 69 (10), 57 (15).

**4,2’-PREF Methyl 3-Benzyl-1,2,3,3a,4,5-hexahydro-4[2-(*p-*tosyloxymethyl)propyl]-7H-pyrrolo(2,3-d)carbazole-6-carboxylate (63b)**. The above more polar alcohol (0.125 g; 0.29 mM) was stirred in 50 cm3  of dry dichloromethane at 0 oC under a nitrogen atmosphere. Triethylamine (0.06 cm3  ; 0.43 mM) was added all at once to the stirring reaction mixture, followed by *p*-toluenesulphonic anhydride (0.142 g; 0.43 mM), added over a period of 10 min. After one hour, TLC indicated partial product formation. An additional 0.5 equiv. of triethylamine (0.020 cm3  ; 0.15 mM) and *p-*toluenesulphonic anhydride (0.047 g; 0.15 mM) was added at 0 oC to the crude reaction mixture. The reaction mixture was stirred at room temperature for two more hours, then poured into 100 cm3  of 10% ammonium hydroxide in satd. brine and extracted with 3 50 cm3  portions of dichloromethane, dried over magnesium sulfate, and concentrated. Chromatography on silica gel, eluted with ethyl acetate/ pentane (1:9), gave 0.12 g of tosylate (71%) and 0.02 g of unreacted alcohol.

For the tosylate made from the more polar alcohol: TLC (SiO2, EtOAc/Hexane 1:1) *Rf* = 0.40 (blue with yellow center, CAS); UV max/nm (EtOH) 327, 300, 224, 199; IR (KBr) max/cm-1 3378, 2921, 2853, 1678, 1610, 1466, 1359, 1249, 1177, 1102, 1043, 966, 815, 748, 667, 555; NMR (270 MHz, CDCl3) 0.45 (ddd, *J* 17, 1 H), 0.74 (d, *J* 7, 3 H), 0.85 (ddd, *J* 12, 1 H), 1.63-1.84 (m, 3 H), 2.03 (ddd, *J* 12, 1 H), 2.38 (s, 3 H), 2.46 (d, *J* 3, 1 H), 2.52 (br.s, 1 H), 2.65 (ddd, *J* 11, 1 H), 2.78 (br.s, 1 H), 2.94 (dd, *J* 9 Hz, 1 H), 3.67-3.55 (m, 2 H), 3.76 (s, 3 H), 3.78-3.73 (m, 1 H), 4.01 (d, *J* 14, 1 H), 6.83 (d, *J* 8 , 1 H), 6.89-6.81 (m, 1 H), 6.98 (d, *J* 7, 1 H), 7.43-7.14 (m, 7 H), 7.6615 (d, *J* 8 Hz, 2 H), 8.93 (br.s, 1 H); NMR (67.9 MHz, CDCl3, from DEPT: CH2 underlined, quat. C *) C15.6, 21.1, 21.3, 21.5, 30.1, 33.3, 33.4(*), 33.5(*), 35.8, 41.9, 50.7, 55.1*, 58.3, 72.5, 75.1, 90.2*, 109.0, 120.3, 121.9, 125.0*, 126.8, 127.5, 127.9, 128.1, 128.7, 129.4, 133.2*, 137.6*, 138.7*, 138.8*, 142.8*, 144.1*, 144.2*, 144.3*, 164.4*, 168.4*; NMR-DEPT C15.7, 21.3, 21.5, 30.1, 33.2, 35.9, 42.0, 50.8, 50.9, 58.5, 72.5, 75.4, 109.2, 120.5, 122.2, 127.2, 127.7, 127.8, 128.3, 128.9, 129.6; MS (EI) *m/z* 587 (0.3%), 586 (M+, 1), 555 (0.3), 527 (0.5), 495 (0.6), 455 (2), 454 (6), 453 (18), 427 (4), 373 (23), 372 (85), 332 (6), 238 (4), 227 (3), 209 (3), 206 (3), 200 (7), 194 (6), 180 (6), 168 (7), 167 (8), 154 (6), 119 (6), 110 (6), 105 (8), 93 (10), 92 (10), 91 (100), 84 (9), 71 (11), 69 (12), 57 (22).

**7*S* and 7*R* Isomers of 5,7-PARF, 5,2'-PARF Methyl 3-Benzyl-1,2,3,4,5,6,7,8-octahydro-5-[2-(*p*-toluenesulfonyloxymethyl)pentyl]azonino(6.7-b)indole-7-(15-vindolinyl)-7-carboxylate (66**, **68** **R = CH3).** A solution of 0.434 g (0.740 mmol,) of the above 4,2’ PARF tosylate in 10 cm3  of dry dichloromethane and 0.155 cm3  (1.11 mmol,) of triethylamine was cooled to 0 oC under a nitrogen atmosphere. After addition of 0.130 cm3  of *tert-*butyl hypochlorite (1.11 mmol) the reaction mixture was stirred for 10 min and then poured into 50 cm3  of distilled water and extracted with 4  30 cm3  of dichloromethane. The extracts were then dried over magnesium sulfate and concentrated in vacuum at 40 oC.

The chlorindolenine mixture was dissolved in 6 cm3  of dry acetone and 0.248 g of solid vindoline (0.54 mM, 0.78 equiv.) was added. The heterogeneous mixture was stirred at 0 OC under nitrogen for 15 min. Tetrafluoroboric acid (0.17 g, 0.155 cm3  , 1.1 mM, 1.5 equiv.) was added followed after a few minutes by silver tetrafluoroborate (0.204 g, 1.1 mM, 1.5 equiv.) added in two portions. The second portion was added 15 min. after addition of the first portion; the total reaction time was 25 min. in partial darkness. The reaction mixture was then poured into 50 cm3  of a satd. solution of 10% ammonium hydroxide in brine, extracted with 3  40 cm3  of dichloromethane, dried over magnesium sulfate, and concentrated in vacuum at 40 OC.

The resulting diastereomeric imine mixture, dissolved in 20 cm3  of glacial acetic acid, was subjected to reductive cleavage with 0.399 g of potassium borohydride (7.40 mM, 10 equiv.) added at room temperature over 30 min. The yellow solution was poured into conc. ammonium hydroxide (100 cm3  ) and crushed ice. The mixture was extracted with 3 40 cm3  of dichloromethane and the organic extracts were dried over magnesium sulfate and concentrated. Centrifugal chromatography, 2  on 4 mm silica gel plates, with application of the mixture in 1 cm3  of dichloromethane. The first silica gel plate was eluted with ether/acetone/Et3N (100:20:2), and the second plate with ethyl acetate/ethanol/Et3N (95:5:1) to give 0.666 g (89% yield based on amount of vindoline used).

For the less polar (7*S)* tosylate couplig product (**66, R = CH3**): TLC(SiO2,Ether/ Acetone / Et3N 100:20:2) *Rf* = 0.21 (purple, CAS); UV (EtOH) max/nm 313, 297, 289, 260, 213, 199; IR (KBr) max/cm-1 3469, 3461, 3448, 2958, 2931, 2925, 2887, 2876, 2868, 2854, 2822, 2800, 2789, 1740, 1701, 1616, 1506, 1499, 1458, 1436, 1362, 1339, 1245, 1234, 1189, 1176, 1144, 1121, 1099, 1040, 1026, 1021, 964, 931, 808, 737, 668; NMR (270 MHz, CDCl3) H0.53 (d, *J*  6 , 3 H), 0.85 (t, *J*  7, 3 H), 1.91-0.97 (m, 11 H), 2.67-2.00 (m, 12 H), 2.70 (s, 3 H), 3.55-2.95 (m, 4 H), 3.63 (s, 5 H), 3.78 (s, 3 H), 5.29 (d, *J*  9, 1 H), 5.45 (s, 1 H), 5.82 (dd, *J* 9, 1 H), 6.09 (s, 1 H), 7.41-6.78 (m, 11 H), 7.65 (d, *J*  8, 4 H), 8.03 (s, 1 H), 9.85-9.84 (br.s, 1 H); MS (EI) *m/z* 870 (0.2%), 811 (0.2), 789 (0.3), 779 (0.2), 750 (0.3), 711 (0.3), 770 (0.3), 655 (0.2), 629 (0.4), 619 (0.7), 527 (0.5), 355 (0.5), 295 (0.7), 281 (0.8), 280 (0.8), 279 (3), 261 (0.6), 252 (0.6), 239 (1), 238 (2), 234 (1), 225 (1), 223 (0.9), 221 (1), 220 (2), 218 (1), 211 (0.9), 206 (1), 205 (4), 199 (2), 183 (1), 182 (1), 177 (1), 176 (1), 171 (4), 169 (2), 167 (6), 155 (3 ), 149 (12), 141 (4), 129 (4), 127 (6), 126 (4), 125 (6), 121 (12), 119 (7), 112 (16), 111 (20), 101 (12), 99 (11), 98 (14), 97 (32), 96 (8), 91 (22), 87 (10), 86 (56), 84 (100.0), 83 (46), 71 (44), 70 (50), 69 (79), 57 (83), 56 (44), 55 (82).

For the more polar (7*R*) tosyl dimer from the non-polar alcohol **(68, R = CH3)**:TLC (SiO2, Ether/ Acetone/ Triethyl amine 100:20:2) *Rf* = 0.16 (tan, CAS); UV (EtOH) max/nm 313, 296, 258, 225, 212, 195; IR (KBr) max/cm-1 3479, 3466, 3458, 3451, 3441, 3427, 3417, 3408, 3400, 3391, 3384, 3369, 3059, 3026, 2958, 2618, 2877, 2849, 2822, 2813, 2803, 2787, 1739,1615, 1597, 1497, 1460, 1432, 1412, 1361, 1338, 1322, 1305, 1296, 1245, 1226, 1189, 1176, 1154, 1146, 1119, 1108, 1097, 1043, 1020, 961, 817, 740, 667; NMR (270 MHz, CDCl3) H 0.35-0.49 (m, 3 H), 0.72 (d, *J*  6, 3 H), 1.26-1.08 (m, 10 H), 1.74- 1.65 (m, 3 H), 2.09 (s, 3 H), 2.51- 2.17 (m, 4 H), 2.82- 2.55 (m, 4 H), 3.39- 3.09 (m, 6 H), 3.57 (s, 3 H), 3.82 (s, 3 H), 5.23 (d, *J*  10, 1 H), 5.50 (s, 1 H), 5.82 (dd, *J* 10, 1 H), 6.09 (s, 1 H), 7.43-6.84 (m, 11 H), 7.69 (d, *J*  8 , 4 H), 8.05 (br.s, 1 H), 9.62 (br.s, 1 H); NMR (67.9 MHz CDCl3) Cl8.2, 17.4, 20.7, 20.9, 21.3, 21.4, 26.3, 30.5, 30.7, 34.7, 35.2, 37.6, 38.0, 43.2, 44.6, 50.7, 51.3, 51.8, 52.0, 52.1, 53.3, 54.2, 54.3, 55.2, 55.5, 57.6, 64.6, 67.1, 75.0, 79.5, 83.6, 94.3, 110.1, 114.6, 118.2, 118.8, 121.9, 122.1, 123.4, 123.9, 124.1, 126.5, 127.7, 127.9, 128.0, 128.2, 128.4, 129.0, 129.6, 129.9, 129.9, 130.2, 132.5, 133.8, 134.9, 140.2, 144.2, 153.2, 158.4, 170.3, 171.8, 175.0; MS (EI), *m/z* 780 (0.2%), 779 (0.4), 778 (0.3), 719 (0.2), 621 (0.2), 619 (0.3), 565 (0.3), 527 (0.3), 512 (0.3), 511 (0.5), 470 (0.3), 469 (1.1), 401 (0.6), 388 (0.4), 387 (0.6), 382 (0.9), 380 (0.9), 370 (0.6), 352 (0.9), 341 (0.8), 328 ().7), 325 (1.2), 324 (2.0), 322 (0.9), 311 (0.8), 109 (0.9), 297 (1), 296 (0.9), 295 (0.9), 283 (1), 282 (3.4), 272 (1), 262 (3), 214 (2), 200 (5), 188 (3), 187 (3), 186 (13), 167 (5), 155 (10), 135 (7), 126 (6), 124 (10), 122 (5), 121 (5), 111 (5), 110 (5), 108 (7), 107 (31), 92 (31), 91 (100), 89 (8), 86 (24), 84 (34), 77 (12), 65 (18), 57 (12), 51 (10).

**7*S* and 7*R* Isomers of 5,7-PARF, 5,2'-PREF Methyl 3-Benzyl-1,2,3,4,5,6,7,8-octahydro-5-[2-(*p*-toluenesulfonyloxymethyl)pentyl]azonino(6.7-b)indole-7-(15-vindolinyl)-7-carboxylate (67, 69 R = CH3).** A solution of 0.522 g (0.89 mmol, 1.0 equiv.) of the above 4,2’ PREF tosylate in 10 cm3  of dry dichloromethane and 0.187 cm3  (1.34 mM, 1.5 equiv.) of triethyl amine was cooled to 0 oC under a nitrogen atmosphere and 0.156 cm3  of *tert-*butyl hypochlorite (1.34 mM, 2.0 equiv.) was added. After 10 min. the reaction mixture was poured into 50 cm3  of distilled water and extracted with 4  30 cm3  of dichloromethane, dried over magnesium sulfate and concentrated in vacuum at 40 oC.

The chlorindolenine mixture was dissolved in 10 cm3  of dry acetone and 0.298 g of solid vindoline (0.65 mM, 0.775 equiv.) was added. The heterogeneous mixture was stirred at 0 oC under nitrogen for 15 min. and tetrafluoroboric acid (0.204 g, 0.186 cm3  , 1.26 mM, 1.5 equiv.) was added to the stirring light yellow-orange solution. After a few minutes silver tetrafluoroborate (0.245 g, 1.26 mM, 1.5 equiv.) was added to this solution in two equal portions. The second portion was added 15 minutes after the first addition, and the total reaction time was 25 min. in partial darkness. The reaction mixture was then poured into 50 cm3  of a solution of 10% ammonium hydroxide in brine, extracted with 3  40 cm3  of dichloromethane, dried over magnesium sulfate, and concentrated in vacuum at 40 oC.

Reductive cleavage of the diastereomeric imine mixture, in 20 cm3  of glacial acetic acid, with 0.799 g of potassium borohydride (0.015 mol, 10 equiv.), added at room temperature over 30 min, was quenched by pouring into a slurry of conc. ammonium hydroxide (100 cm3  ) and crushed ice. The mixture was extracted with 3  40 cm3  of dichloromethane and the organic extracts were combined and dried over magnesium sulfate. After concentration, the crude reaction mixture was purified by two centrifugal chromatography procedures. The first silica gel plate was eluted with ether/acetone/Et3N (100:20:2), which separated the less polar tosyl coupling product from vindoline and the more polar tosyl coupling product. The second silica gel plate was eluted with ethyl acetate/ ethanol/Et3N (95:5:1), in order to separate vindoline from the more polar tosyl coupling product. The combined yield of **71** and **73** was 0.648 g (72% based on vindoline used).

For the less polar tosylate coupling product (7*S*, **67, R = CH3**) TLC (SiO2, ether/acetone/Et3N 100:20:2) *Rf* = 0.24 (purple, CAS); UV (EtOH) max/nm313, 297, 292, 261, 224, 215, 20; IR (KBr) max/cm-1 3504-3353, 2952-2821, 1736, 1616, 1498, 1458, 1435, 1363, 1247, 1236, 1189, 1176, 1154, 1146, 1096, 1042, 964; NMR (270 MHz, CDCl3) H0.16 (d, *J* 6, 3 H), 0.90-0.61 (m, 5 H), 0.91-1.37 (m, 5 H), 1.54-1.53 (br.s, 3 H), 2.03 (s, 3 H), 2.28 (s, 2 H), 2.36 (s, 3 H), 2.44 (dd, *J* 10, 2 H), 2.59 (s, 3 H), 3.29-2.93 (m, 4 H), 3.65-3.37 (m, 6 H), 3.71 (s, 3 H), 5.23 (d, *J* 9, 1 H), 5.37 (s, 1 H), 5.74 (dd, *J*  10, 1 H), 6.03 (s, 1 H), 7.40-6.74 (m, 11 H), 7.64 (d, *J* 8, 4 H), 7.99-7.93 (br.s, 1 H), 9.73-9.69 (br.s, 1 H); NMR (67.9 MHz, CDCl3)C.3, 16.0, 20.8, 21.3, 25.4, 30.2, 30.8, 33.7, 36.4, 38.3, 39.0, 42.9, 44.4, 49.9, 50.1, 51.7, 51.9, 53.2, 53.3, 55.5, 56.3, 61.5, 63.4, 66.0, 75.3, 79.7, 83.5, 94.2, 110.2, 114.7, 118.0, 118.8, 121.9, 122.1, 123.4, 124.2, 125.1, 125.2, 126.3, 127.6, 127.8, 127.9, 128.0, 128.8, 129.4, 129.6, 130.1, 132.4, 133.8, 135.0, 139.9, 144.3, 143.0, 158.1, 170.5, 171.5, 174.6; MS (EI) *m/z* 469 (0.3%), 456 (0.3), 432 (0.3), 429 (0.4), 382 (0.6), 380 (1.6), 369 (2), 355 (2), 337 (1), 325 (1), 323 (2), 322 (1), 309 (1), 297 (2), 295 (5), 281 (4), 221 (9), 200 (5), 188 (7), 187 (7), 186 (23), 171 (8), 167 (6), 156 (7), 155 (23), 149 (10), 127 (12), 124 (12), 113 (10), 111 (15), 108 (12), 107 (39), 106 (15), 99 (16), 96 (12), 92 (41), 91 (100), 85 (48), 79 (16), 69 (30), 65 (25), 60 (20), 57 (80), 55 (37).

For the more polar (7*R*) tosylate coupling product **69, R = CH3**: TLC (SiO2, Ether/ Acetone/Et3N 100:20:2) *Rf* = 0.14 (tan, CAS); UV (EtOH) max/nm324, 311, 298, 289, 262, 226, 213, 200; IR (KBr) max/cm-1 3470-3415,3016, 2958-2792, 1739, 1615, 1504, 1461, 1434, 1364, 1260, 1176, 1097, 1039 cm-1; NMR (270 MHz, CDCl3) H0.40-0.33 (m, 3 H), 0.62 (t, *J* 12, 3 H), 1.26-1.01 (m, 8 H), 1.77-1.43 (m, 2 H), 1.92-1.82 (m, 1 H), 2.06 (s, 3 H), 2.43-2.34 (m, 5 H), 2.73 (s, 3 H), 3.35-3.04 (m, 3 H), 3.42 (s, 3 H), 3.56 (s, 3 H), 3.68 (d, *J*  6, 2 H), 3.79 (s, 3 H), 5.21 (d, *J* 11, 1 H), 5.42 (s, 1 H), 5.80 (dd, *J* 10, 1 H), 6.12 (s, 1 H), 7.43-6.84 (m, 11 H), 7.69 (d, *J*  8, 4 H), 8.14 (br.s, 1 H), 9.77 (s, 1 H); NMR (67.9 MHz, CDCl3) C8.1, 15.6, 20.7, 21.3, 26.2, 30.1, 30.7, 32.6, 34.2, 37.3, 38.3, 43.0, 44.9, 50.3, 50.5, 50.9, 51.8, 52.0, 53.2, 53.4, 54.3, 55.4, 59.2, 64.8, 66.8, 75.8, 79.6, 83.8, 93.9, 110.0, 115.3, 118.1, 118.8, 122.0, 123.8, 123.9, 124.1, 125.2, 126.5, 127.7, 128.0, 128.3, 128.9, 129.1, 129.6, 130.1, 132.2, 133.7, 135.0, 140.1, 144.2, 153.2, 158.4, 170.3, 171.7, 174.7; MS (EI) *m/z* 872 (0.4%), 871 (0.6), 870 (0.3), 782 (1), 780 (2), 779 (1), 750 (0.8), 722 (0.8), 621 (0.5), 513 (0.7), 469 (1.0), 369 (0.8), 355 (0.9), 341 (0.9), 337 (0.7), 325 (1), 324 (2), 309 (1), 296 (1), 295 (2), 283 (1), 282 (3), 279 (3), 277 (3), 263 (6), 22 (4), 220 (6), 205 (8), 197 (5), 187 (7), 186 (7), 182 (9), 181 (7), 171 (9), 167 (12), 157 (16), 155 (11), 149 (11), 141 (13), 139 (11), 127 (12), 126 (20), 121 (11), 112 (11), 111 (21), 108 (13), 107 (40), 105 (10), 101 (19), 97 (31), 92 (29), 91 (100), 85 (24), 83 (32), 71 (46), 57 (63), 55 (65).

_ ____

_**20’-Methyl-20'-deethyl-20’-deoxyvinblastine (10) and Atropisomer (49)**. The ring D' cyclization of the amino tosylate **66** (0.311 g, 0.298 mM) required heating in toluene at reflux for 17 h. The quaternary salt, which was formed, was triturated with anydrous ethyl ether. The salt was then debenzylated in 10 cm3  of dry MeOH with 10% Pd/C/H2 (30 mg) until the uptake of hydrogen ceased. The heterogeneous reaction mixture was rinsed through a plug of Celite with many washings with dry MeOH. After concentrating the collected methanol washings, the low energy (**10**) and high energy ( **49**) atropisomers were purified by centrifugal chromatography. The first Chromatotron (4 mm) silica gel plate was eluted with 5% Et3N/MeOH to separate compounds (**10** ) and ( **49** ). Then each product required an additional chromatographic purification. Compound **10** was rechromatographed on a 2 mm Chromatotron plate, eluted with 10% MeOH/CH2Cl2 (**10**, 0.188 g, 81%) and atopisomer **49** was chromatographed on a 1 mm silica gel plate, eluted with 5% Et3N/MeOH (**49**, 0.010 g, 4%).

For (**10**): TLC (SiO2, 10% MeOH/ CH2Cl2) *Rf* = 0.29 (tan, CAS); UV (EtOH) max/nm293, 285, 257, 225, 209, 199; IR (KBr) max/cm-1 3576-3223, 2991-2817, 1740, 1616, 1503, 1460, 1433, 1371, 1243, 1231, 1038, 744; NMR (270 MHz, CDCl3) H0.81 (t, *J* 7, 3 H), 0.97 (d, *J* 5, 3 H), 1.46-1.24 (m, 3 H), 1.95-1.67 (m, 2 H), 2.59-1.97 (m, 10 H), 2.92-2.60 (m, 4 H), 3.54-2.94 (m, 5 H), 4.16-3.55 (m, 14 H), 5.33 (d, *J* 10, 1 H), 5.45 (s, 1 H), 5.89 (dd, *J* 9, 1 H), 6.11 (s, 1 H), 6.49 (s, 1 H), 7.31-7.12 (m, 4 H), 7.47 (d, *J* 8, 1 H), 7.98 (br.s, 1 H), 9.72 (br.s, 1 H); NMR (67.9 MHz, CDCl3) C8.4, 19.0, 19.5, 19.6, 21.0, 25.7, 27.0, 30.8, 35.3, 37.8, 39.8, 42.8, 43.6, 44.7, 50.4, 52.1, 52.5, 52.6, 53.2, 53.3, 55.3, 55.8, 66.0, 76.4, 79.7, 83.0, 94.2, 110.8, 113.5, 117.7, 119.3, 120.1, 123.1, 123.2, 123.4, 123.6, 124.7, 128.4, 129.8, 130.6, 135.0, 153.3, 158.0, 170.9, 171.6, 173.7; MS (EI) *m/z* 780 (M+, 0.1%), 750 (0.2), 722 (0.1), 622 (0.04), 469 (0.06), 324 (0.4), 282 (0.4), 279 (0.3), 238 (0.3), 205 (0.3), 167 (1), 166 (1), 149 (3), 135 (3), 129 (1), 124 (7), 109 (4), 99 (2), 86 (36), 84 (56), 83 (10), 71 (9), 57 (15), 50 (100).

For (**49**): TLC (SiO2, ether/toluene/diethyl amine/methanol 100:5:5:5) *Rf* = 0.37 (purple, CAS); UV (EtOH)max/nm 306, 291, 282, 264, 225, 213, 209, 199; IR (KBr) max/cm-1 3458-3374, 3051-2789, 1741, 1615, 1498, 1459, 1432, 1371, 1249, 1238, 1039, 741; NMR (270 MHz, CDCl3) H1.59-0.44 (m, 16 H), 1.84-1.61 (m, 2 H), 3.09-1.99 (m, 13 H), 4.23-3.11 (m, 13 H), 5.26 (d, *J* 9, 1 H), 5.51 (br.s, 1 H), 5.91-5.88 (br.s, 1 H), 6.91 (br.s, 1 H), 7.70-7.10 (m, 7 H), 9.68 (br.s, 1 H); NMR (67.9 MHz, CDCl3) C 9.2, 9.3, 9.5, 10.9, 10.9, 19.2, 19.3, 21.0, 23.0, 23.5, 23.8, 29.0, 29.5, 30.5, 31.2, 37.9, 38.9, 42.4, 43.1, 43.8, 51.1, 52.2, 52.3, 52.4, 52.5, 53.2, 56.0, 68.2, 79.5, 83.5, 85.2, 94.8, 105.3, 110.2, 118.4, 119.0, 121.3, 124.4, 130.2, 130.8, 133.7, 137.4, 153.7, 170.9, 171.9, 184.3.

**20'-Methyl-20’-deethyl-20’-deoxyvincovaline (72) and Its Atropisomer (70)**.The ring D' cyclization of the amino tosylate (**68**) (0.290 g, 0.278 mM) required heating in toluene at reflux for 20 h. The quaternary salt that was formed, was triturated with anhydrous ethyl ether and filtered. The salt was debenzylated in 10 cm3  of dry MeOH with 10% Pd/C/H2 (30 mg) until the uptake of hydrogen ceased. The heterogeneous reaction mixture was then rinsed through a plug of Celite with many washings of dry MeOH. After concentration, the lower energy (**72**) and higher energy (**70**) atropisomers were purified by centrifugal chromatography. The first Chromatotron (2 mm) silica gel plate was eluted with 5% Et3N/MeOH to separate compounds **72** and **70**. Then the lower energy product (**72**) was rechromatographed on a 1 mm Chromatotron plate, eluted with 10% MeOH/CH2Cl2 (**72**, 0.079 g, 37%) and its higher energy atropisomer **70** was chromatographed on a 1 mm silica gel plate, eluted with 5% Et3N/MeOH (**70**, 0.111 g, 51%).

For (**72**): TLC (SiO2, 10% MeOH/CH2Cl2) *Rf* = 0.42 (red-brown, CAS); UV (EtOH) max/nm 291, 253, 225, 209, 199; IR (KBr) max/cm-1 3682-3294, 2955-2846, 1739, 1616, 1501, 1460, 1433, 1246, 1227, 1178, 1146, 1041, 1005, 740; NMR (270 MHz, CDCl3)H.0.38 (t, *J =* 7 Hz, 3 H), 1.08-0.75 (m, 6 H), 1.67-1.53 (m, 2 H), 2.52-1.91 (m, 10 H), 3.09-2.65 (m, 6 H), 3.49-3.11 (m, 4 H), 3.87-3.56 (m, 13 H), 5.22 (d, *J* 10, 1 H), 5.46 (s, 1 H), 5.81 (dd, *J* 10, 1 H), 6.15 (s, 1 H), 6.68 (s, 1 H), 7.27-7.11 (m, 4 H), 7.45 (d, *J* 8, 1 H), 8.02 (s, 1 H), 9.69 (s, 1 H); NMR (67.9 MHz, CDCl3) C8.3, 20.0, 20.3, 21.0, 30.9, 38.3, 40.4, 42.9, 44.3, 44.7, 50.6, 51.2, 52.2, 52.4, 53.4, 53.4, 53.6, 55.5, 55.7, 67.0, 76.0, 79.5, 83.7, 94.3, 110.4, 118.1, 119.6, 119.9, 120.0, 122.9, 123.0, 124.1, 124.2, 124.2, 128.7, 129.8, 129.9, 130.6, 135.1, 153.5, 158.2, 170.7, 171.8, 174.0; MS (EI) *m/z* 781 (0.3%), 780 (M+, 1), 722 (0.7), 469 (2), 324 (2), 301 (7), 282 (2), 279 (4), 256 (2), 229 (29), 171 (43), 167 (19), 149 (41), 135 (13), 124 (25), 123 (11), 111 (19), 110 (14), 97 (25), 91 (32), 83 (36), 75 (14), 73 (57), 69 (47), 57 (82), 50 (100).

For (**70**): TLC (SiO2, ether/toluene/diethyl amine/methanol 100:5:5:5) *Rf* = 0.39 (purple, CAS); UV (EtOH) max/nm303, 291, 280, 262, 226, 213, 209, 199; IR (KBr) max/cm-1 3485-3339, 2957-2856, 1739, 1616, 1500, 1460, 1432, 1371, 1249, 1197, 1122, 1043, 741; NMR (270 MHz, CDCl3) H0.65-0.46 (br.s, 2 H), 1.54-0.76 (m, 11 H), 1.95-1.64 (m, 2 H), 2.09 (s, 3 H), 3.13-2.32 (m, 13 H), 3.87-3.32 (m, 13 H), 5.25 (d, *J =* 10 Hz, 1 H), 5.46 (br.s, 1 H), 5.90-5.80 (br.s, 1 H), 6.07 (br.s, H), 7.49-7.11 (m, 7 H), 9.67 and 9.45 (2  br.s, 1 H), 10.88 (br.s).

**20'-Methyl-20'-deethyl-20'-deoxyleurosidine (11) and Its Atropisomer (50).** The ring D' cyclization of the amino tosylate **67** (0.310 g, 0.297 mM) required heating in toluene at reflux for 5 days. The quaternary salt, which was formed, was triturated with anhydrous ethyl ether. The salt was then hydrogenolyzed in 10 cm3  of dry MeOH with 10% Pd/C (30 mg) until the uptake of hydrogen ceased. The heterogeneous reaction mixture was rinsed through a plug of Celite with many washing of dry MeOH. After concentration, the high energy (**11**) and low energy (**50**) atropisomers were purified by centrifugal chromatography. The first Chromatotron (2 mm) silica gel plate was eluted with 5% Et3N/MeOH to separate compounds **11** and **50**. The low energy atropisomer 11 was chromatographed on a 1 mm Chromatotron plate, eluted with 10% MeOH/CH2Cl2 (**11**, 0.141 g, 61%) and the high energy atropisomer **50** was rechromatographed on a 1 mm silica gel plate, eluted with 5% Et3N/MeOH (**50**, 0.058 g, 25%).

For **11**: TLC (SiO2, 10% MeOH/CH2Cl2) *Rf* = 0.55 (tan, CAS); UV (EtOH) max/nm 295, 287, 261, 213; IR (KBr) max/cm-1 3663-3390, 3020-2767, 1742, 1616, 1501, 1458, 1432, 1371, 1333, 1299, 1242, 1226, 1192, 1171, 1146, 1130, 1119, 1108, 1094, 1060, 1040, 1005, 740; NMR (250 MHz, CDCl3) H0.76-0.68 (m, 6 H), 1.46-0.98 (m, 5 H), 2.81-1.68 (m, 14 H), 3.37-3.14 (m, 5 H), 3.73-3.56 (m, 14 H), 5.24 (d, *J*  8, 1 H), 5.38 (s, 1 H), 5.79 (dd, *J* 10, 1 H), 6.03 (s, 1 H), 6.51 (s, 1 H), 7.20-7.04 (m, 4 H), 7.43 (d, *J*  7, 1 H), 7.95 (s, 1 H), 9.89 (s, 1 H); NMR (67.9 MHz, CDCl3) C 8.3, 19.6, 21.0, 29.7, 30.9, 30.9, 34.5, 34.6, 38.2, 42.9, 44.7, 44.8, 50.4, 50.5, 52.1, 52.3, 52.5, 53.2, 53.4, 53.4, 55.5, 55.8, 56.9, 66.0, 76.5, 79.8, 83.3, 94.2, 110,6, 118.1, 119.4, 119.8, 123.2, 123,6, 123.8, 124.6, 124.7, 128.2, 129.0, 130.0, 130.4, 135.2, 153.2, 158.2, 170.9, 171.7, 174.0; MS (EI) *m/z* 781 (M+1+, 2%), 751 (2), 750 (5), 723 (1), 722 (4), 719 (0.4), 650 (0.6), 622 (2), 619 (0.7), 541 (2), 513 (2), 512 (1), 497 (0.7), 482 (2), 469 (2), 455 (0.6), 389 (1), 381 (2), 380 (2), 379 (2), 366 (1), 357 (1), 355 (1), 341 (2), 339 (1), 327 (2), 324 (5), 311 (4), 309 (2), 297 (3), 282 (12), 251 (5), 238 (5), 188 (4), 171 (4), 144 (6), 136 (5), 135 (25), 124 (69), 122 (17), 121 (15), 110 (26), 107 (11), 96 (25), 83 (43), 69 (62), 57 (100), 55 (90), 50 (48).

For **50**: TLC (SiO2, 15% MeOH/CH2Cl2) *Rf* = 0.54 (blue, CAS); UV (EtOH) max/nm 341, 306, 291, 281, 261, 226, 216, 194; IR (KBr) (max/cm-1 3544-3270, 2920-2783, 1739, 1616, 1499, 1458, 1432, 1372, 1244, 1235, 1192, 1177, 1144, 1038, 741; NMR (270 MHz, CDCl3) H 0.34-0.23 (br.s, 1 H), 1.41-0.77 (m, 13 H), 1.97-1.50 (m, 2 H), 3.27-1.98 (m, 15 H), 3.99-3.28 (m, 13 H), 5.15-5.14 (br.s, 1 H), 5.40 (br.s., 1 H), 5.85-5.81 (br.s, 1 H), 6.09-6.08 (br.s, 1 H), 7.43-7.01 (m, 7 H), 8.61 (br.s, ?), 9.68 (br.s, ?), 10.03 (br.s, ?); NMR (67.9 MHz, CDCl3) C 8.3, 12.6, 19.7, 19.8, 21.0, 21.8, 25.9, 26.7, 27.0, 29.6, 30.9, 37.8, 43.6, 50.5, 52.2, 52.7, 52.9, 57.9, 53.0, 53.2, 53.3, 55.7, 55.8, 59.0, 76.2, 79.2, 83.3, 111.3, 111.8, 118.2, 118.4, 119.8, 119.9, 120.1, 122.7, 124.0, 124.3, 130.1, 153.7, 160.0, 170.8, 172.0; MS (EI) *m/z* 781 (M+1+, 0.4%), 779 (0.4), 750 (0.7), 722 (0.7), 622 (0.4), 542 (0.2), 325 (0.6), 324 (0.4), 311 (0.5), 297 (0.5), 282 (2), 279 (0.6), 256 (0.7), 251 (0.6), 239 (0.6), 283 (0.5), 222 (0.6), 220 (0.5), 205 (0.5), 199 (0.7), 183 (0.6), 174 (0.4), 171 (4), 167 (2), 149 (6), 143 (1), 135 (5), 129 (3), 127 (4), 124 (9), 122 (3), 121 (4), 115 (3), 112 (8), 111 (10), 107 (3), 105 (3), 101 (9), 97 (16), 91 (11), 86 (27), 83 (24), 69 (44), 57 (63), 55 (65), 50 (100).

**20'-Methyl-20'-deethyl-20'-deoxy-20'-epi-vincovaline (73) and Atropisomer (71)**. The ring D' cyclization of the amino tosylate **69** (0.300 g, 0.288 mM) required heating in toluene at reflux for 7 days. The quaternary salt that was formed was triturated with anhydrous ethyl ether and filtered. The salt was debenzylated by hydrogenolysis in 10 cm3  of dry MeOH with 10% Pd/C (30 mg) until uptake of hydrogen ceased. The heterogeneous reaction mixture was then rinsed through a plug of Celite with many washings of dry MeOH. After concentrating the collected methanol washings, the high energy (**73**) and low energy (**71**) atropisomers were purified by centrifugal chromatography. The first Chromatotron (4 mm) silica gel plate was eluted with 5% Et3N/MeOH to separate compounds **73** and **71**. The atropisomer **73** was rechromatographed on a 1 mm Chromatotron plate, eluted with 10% MeOH/CH2Cl2 (**73**, 0.106 g, 47%) and the atropisomer **75** was rechromatographed on a 1 mm silica gel plate, eluted with 5% Et3N/MeOH (**71**, 0.093 g, 41%).

For low energy atropisomer **73**: TLC (SiO2, 10% MeOH/CH2Cl2) *Rf* = 0.59 (red-brown, CAS); UV (EtOH) max/nm 298, 290, 257, 214; IR(KBr) max/cm-1 3650-3299, 3030-2729, 1741, 1668, 1653, 1616, 1500, 1458, 1433, 1371, 1334, 1299, 1244, 1255, 1172, 1146, 1129, 1120, 1109, 1041, 1005, 742; NMR (270 MHz, CDCl3) H 0.33 (t, *J* = 7, Hz, 3 H), 1.22-0.66 (m, 6 H), 1.57-1.46 (m, 2 H), 2.88-1.82 (m, 16 H), 3.71-3.04 (m, 11 H), 3.73 (s, 6 H), 5.16 (d, *J* = 10 Hz, 1 H), 5.41 (s, 1 H), 5.72 (dd, *J* = 10 Hz, 1 H), 6.07 (s, 1 H), NMR (67.9 MHz, CDCl3) C8.4, 19.5, 21.0, 26.2, 29.7, 30.5, 31.1, 34.1, 38.4, 41.3, 43.1, 44.6, 48.2, 50.7, 51.5, 52.1, 52.2, 53.3, 53.5, 55.7, 55.9, 56.5, 61.9, 67.6, 76.2, 79.6, 83.7, 94.4, 110.2, 118.5, 119.0, 121.4, 122,4, 123.8, 124.3, 129.2, 130.1, 311.0, 135.3, 153.3, 158.4, 170.6, 171.9, 174.9; MS (EI) *m/z* 782 (0.4%), 781 (M+1+, 2), 779 (0.3), 750 (1), 722 (3), 651 (0.6), 621 (2), 541 (1), 513 (1), 482 (1), 469 (4), 390 (1), 389 (1), 381 (1), 357 (1), 355 (2), 343 (1), 341 (2), 325 (5), 311 (4), 1297 (3), 282 (9), 251 (4), 238 (5), 188 (6), 144 (7), 135 (32), 124 (99), 111 (25), 107 (15), 97 (46), 86 (30), 84 (41), 83 (41), 71 (45), 69 (75), 57 (100), 55 (94), 50 (77).

For high energy atropisomer **71**: TLC (SiO2, 15% MeOH/CH2Cl2) *Rf* = 0.59 (blue, CAS); UV (EtOH) max/nm 307, 293, 285, 261, 226, 215, 194; IR (KBr) max/cm-1 3680-3340, 3080-2800, 1741, 1719, 1618, 1500, 1491, 1459, 1431, 1378, 1302, 1250, 1236, 1190, 1176, 1151, 1130, 1121, 1020, 1003, 922, 584; NMR (250 MHz, CDCl3) H0.52 (t, *J* 7, 3 H), 1.26-1.04 (m, 5 H), 2.10-1.51 (m, 6 H), 3.23-2.26 (m, 19 H), 3.87-3.55 (m, 11 H), 5.25 (d, *J* 10, 1 H), 5.49 (s, 1 H), 5.91 (dd, *J* 10, 1 H), 5.98 (s, 1 H), 6.89 (s, 1 H), 7.28-7.07 (m, 4 H), 7.42 (d, *J*  8 , 1 H), 9.32 (s, 1 H), 10.85 (s, 1 H); NMR (67.9 MHz, CDCl3) C 7.7, 19.2, 20.1, 20.9, 25.5, 26.8, 30.8, 34.2, 34.2, 36.7, 38.0, 43.0, 45.3, 47.7, 51.3, 51.3, 52.2, 52.4, 52.8, 53.0, 53.1, 56.0, 67.6, 76.2, 76.5, 79.4, 83.3, 95.7, 108.0, 111.2, 117.6, 119.7, 120.5, 122.0, 124.2, 126.9, 130.3, 134.0, 134.6, 153.2, 160.1, 170.8, 171.7, 176.3; MS (EI) *m/z* (relative intensity) 780 (M+, 0.2), 722 (0.2), 469(0.2), 325 (0.2), 311 (0.1), 295 (0.1), 282 (0.3), 256 (0.2), 253 (0.2), 239 (0.3), 224 (0.3), 211 (0.3), 205 (0.4), 197 (0.3), 196 (0.3), 183 (0.5), 171 (1), 169 (0.6), 167 (0.7), 155 (1), 149 (3), 141 (0.8), 135 (1), 124 (2), 115 (2), 111 (4), 101 (3), 99 (4), 98 (4), 97 (7), 91 (7), 86 (14), 84 (13), 71 (15), 69 (16), 57 (30), 52 (34), 50 (100).

***For Scheme 2. Synthesis of 20'-Deoxy-20'-deethyl-20'S-n-propyl-vinblastine (7R)****.*

**N-[1-(*E*)-Penten-1-yl]pyrrolidine.** To 200 cm3  (170.4 g, 2.40 mol) of rapidly stirred pyrrolidine at 3 oC, under argon, was added 100 g (0.72 mmol) of potassium carbonate followed by 127 cm3  (102.9 g, 1.19 mol) of valeraldehyde, dropwise over 75 min. After stirring at 3 - 5 oC for 6 h, the suspension was stored at ca. 0 oC for 64 h, filtered and the collected solids were washed with 2 x 50 cm3  of anhydrous ether. The combined filtrates were concentrated in vacuo and the residue was distilled to give 142.32 g (85.7%) of N-[1-(*E*)-penten-1-yl]pyrrolidine, bp 54 - 56 oC (0.6 - 0.7 mm Hg).

**4-Formylheptanenitrile**.A solution of 142.23 g (1.02 mol) of N-[1-(*E*)-penten-1-yl]pyrrolidine and 100 cm3  (80.6 g, 1.52 mol) of acrylonitrile in 570 cm3  of 1,4-dioxane was heated at gentle reflux, under argon, for 16 h. Then 50 cm3  of water was added and the mixture was stirred at reflux for a further 8 h. After concentration in vacuo, 200 g of ice, 400 cm3  of 3N hydrogen chloride solution, and 600 cm3  of dichloromethane were added, and the mixture was stirred for 15 min. The aqueous layer was separated and extracted with 3  300 cm3  of dichloromethane, and the combined organic layers were washed with 2  150 cm3  of saturated brine, dried (MgSO4), filtered and concentrated. The residue (140.2 g) was distilled to give 46.96 g (33.0%) of 4-formylheptanenitrile bp 103 - 104 oC (1.33 mm Hg).

**4-(Hydroxymethyl)heptanenitrile.** To a solution of 46.94 g (0.338 mol) of 4-formylheptanenitrile in 250 cm3  of methanol at 3 oC under argon, was added 4.55 g (0.120 mol) of sodium borohydride, portionwise over 1 h. After stirring at 5 oC for 1 hr, the reaction mixture was poured into a mixture of 100 g of ice and 200 cm3  of 2N hydrogen chloride solution and extracted with 500 cm3  , followed by 4 x 250 cm3  , of ether. The combined extracts were washed with 2 x 150 cm3  of saturated brine, dried (Na2SO4), filtered and concentrated. The residue was dried (40 oC/1.0 mm Hg) to give 45.50 g (95.6%) of crude 4-(hydroxymethyl)heptanenitrile; TLC ((SiO2, 1:1 ethyl acetate:hexane) *Rf* = 0.28 (PMA); IR (chloroform): max 3625 (OH), 3490 (OH), 2245 (CN) cm-1.

**4-(*tert-*Butyldimethylsiloxymethyl)heptanenitrile.** To a mixture of 45.50 g (0.323 mol) of crude 4-(hydroxymethyl)heptanenitrile and 53.5 g of *tert-*butyldimethylsilyl chloride in 450 cm3  of dichloromethane at 3 - 4 oC under argon, was added a solution of 67.5 cm3  (50.1 g, 0.388 mol) of diisopropylethylamine in 67.5 cm3  of dichloromethane, dropwise over 10 min. Then 3.94 g (32.2 mmol) of 4-dimethylaminopyridine was added and after stirring at room temperature for 66 h, the dark reaction mixture was washed with 150 cm3  of 2N hydrogen chloride solution, 150 cm3  of water and 150 cm3  of saturated brine, dried (MgSO4), filtered, and concentrated. The residue was redissolved in dichloromethane, 180 g of silica gel was added and the solvent was removed under vacuum. The residual powder was placed on top of a 2 3/8" x 9" column of 270 g of silica gel and eluted, sequentially, with 1 L of hexane, 1 L of 1:19 ethyl acetate:hexane and 1 L of 1:9 ethyl acetate:hexane; 500 cm3  fractions were collected. Fractions 3-7 were combined and concentrated in vacuo, and the residue was distilled to give 68.22 g (82.9%) of 4-(*tert-*butyldimethylsiloxymethyl)heptanenitrile, bp 114 - 117 oC (0.9 -1.0 mm Hg).

**4-(*tert-*Butyldimethylsiloxymethyl)heptanal (65)**. To a solution of 12.15 g (47.6 mmol) of 4-(*tert-*butyl-dimethylsiloxymethyl)heptanenitrile in 120 cm3  of toluene at -70 oC under argon, was added 35.3 cm3  (53.0 mmol) of a 1.5 M solution of diisobutylaluminum hydride in toluene. After stirring at -70  oC for 3.25 h, 36.5 cm3  of methanol was added and the mixture was poured into a mixture of ca. 200 cm3  of ether, ca. 100 g of ice and 214 cm3  of 3N hydrogen chloride solution. The aqueous layer was separated and extracted with 3  200 cm3  of ether. The combined organic layers were washed with 120 cm3  of saturated sodium bicarbonate solution and 120 cm3  of saturated brine (a gelatinous precipitate, which resulted on washing with saturated brine, was removed by filtration through Celite prior to separation of the aqueous layer), dried (Na2SO4), filtered and concentrated. The residue was purified by column chromatography on silica gel to give 10.01 g (81.4%) of crude 4-(*tert-*butyldimethylsiloxymethyl)heptanal (**65**). TLC (SiO2, 1:9 ethyl acetate:hexane) *Rf* = 0.55 (PMA); IR (chloroform) max/cm-1 1719 (aldehyde C=O).

**Racemic Methyl 1,2,4,6-Tetrahydro-11,[3-(*tert-*butyldimethylsiloxymethyl)hexyl]-3.10b-methanoazepino (4,5-b)indole-5-carboxylate .** To a solution of 9.99 g (38.7 mmol) of 4-(*tert-*butyldimethylsiloxymethyl)heptanal (**65**) in 40 cm3  of methanol, under argon, was added 8.59 g (35.2 mmol) of methyl 1,2,3,4,5,6-hexahydroazepino(4,5-b)-indole-5-carboxylate (**64**). After stirring at room temperature for 19 h the solvent was removed in vacuo. The residue was purified by column chromatography on silica gel to give 17.45 g (quantitative) of crude racemic methyl 1,2,4,6-tetrahydro-11-,[3-(*tert*-butyldimethylsiloxymethyl)hexyl]-3,10b-methanoazepino(4,5-b)indole-5-carboxylate. TLC (SiO2, 37:3 chloroform:methanol) *Rf* = 0.39 (PMA); IR (chloroform) max 3445 (NH), 3405 (NH), 1680 (ester C=O) cm-1; MS *m/z* 484 (M+); NMR (200 MHz, CDCl3) H9.00 (s, 1/3 H), 8.60 (s, 2/3 H), 7.20 (m, 2 H), 6.90 (m, 2 H), 3.85 (d, 1 H), 3.70 (2 s, 3 H), 3.60-3.20 (m, 5 H), 2.90 (m, 2 H), 2.30 (m, 2 H), 1.65 (brs, 2 H), 1.20 (m, 9 H), 0.80 (s, 9 H), 0.0 (2 s, 4 H), -0.1 (2 s, 2 H).

**4,2'-PREF and 4,2’-PARF Methyl 3-Benzyl-1,2,3,3a,4,5-hexahydro-4[2-(*tert*-butyldimethylsiloxymethyl)pentyl]-7H-pyrrolo(2,3-d)carbazole-6-carboxylate.** To a solution of 17.45 g of crude methyl 1,2,4,6-tetrahydro-11-[3-(*tert*-butyldimethylsiloxymethyl)hexyl]-3,10b-methyanoazepino (4,5-b)indole-5-carboxylate in 340 cm3  of dry tetrahydrofuran was added 5 cm3  (7.12 g, 41.6 mmol) of benzyl bromide. The reaction mixture was stirred at room temperature, under argon, for 19 h, then concentrated and the residual white solid, the quaternary 3-benzyl-1,2,4,6-tetrahydro-11[3-(*tert*-butyldimethylsiloxymethyl)hexyl]-3,10b-methanoazepino-5-methoxycarbonyl- (4,5-b)indolium bromide, was dissolved in 240 cm3  of methanol. Then 11 cm3  (8.00 g, 61.9 mmol) of diisopropylethylamine was added and the reaction mixture was heated to reflux, under argon, for 3 h. The solvent was removed in vacuo and the residue was purified by column chromatography on silica gel to give 16.48 g (81.6% from methyl 1,2,3,4,5,6-hexahydroazepino (4,5-b)indole-5-carboxylate, **60**) of a diastereomeric mixture of 4-2'-PREF and 4,2'-PARF methyl 3-benzyl-1,2,3,3a,4,5-hexahydro-4[2-(*tert*-butyldimethyl-siloxymethyl)pentyl]-7H-pyrrolo (2,3-d)carbazole-6-carboxylate. TLC (SiO2, 1:9 ethyl acetate:hexane) *Rf* = 0.28 (PMA); IR (chloroform) max/cm-1 3390 (NH) 1672 (ester C=O). MS *m/z* 574 (M+); NMR (200 MHz, CDCl3) H 9.01, 8.99 (2 s, 1 H), 7.45-6.75 (m, 9 H), 4.28 (d, 1 H), 3.72 (2 s, 3 H), 3.50-3.30 (m, 3 H), 2.90 (t, 2 H), 2.75-2.20 (m, 3 H), 2.58 (2 s, 2 H), 2.00 (m, 1 H), 1.75-1.50 (m, 2 H), 1.10 (bs, 2 H), 0.90 (2 s, 3 H), 0.80 (2 s, 9 H), 0.005 (2 s, 2 H), -0.005 (2 s, 4 H).

**4,2'-PREF and 4,2'-PARF Methyl 3-Benzyl-1,2,3,3a,4,5-hexahydro-4[2-(hydroxymethyl)-pentyl]-7H-pyrrolo (2,3-d)carbazole-6-carboxylate**. To a solution of 16.46 g (28.7 mmol) of a mixture of 4,2'-PREF and 4,2’-PARF methyl 3-benzyl-1,2,3,3a,4,5-hexahydro-4[2-(*tert*-butyldimethylsiloxymethyl)pentyl]-7H-pyrrolo (2,3-d)carbazole-6-carboxylate in 170 cm3  of acetonitrile was added 8.20 g (87.1 mmol) of potassium fluoride dihydrate, followed by 21.5 g (91.6 mmol) of benzyltriethylammonium chloride. The reaction mixture was heated to reflux under argon for 48 h, then concentrated. The residue was purified by column chromatography on silica gel to give 10.85 g (82.3%) of a diastereomeric mixture of 4,2'-PREF and 4,2'-PARF methyl 3-benzyl-1,2,3,3a,4,5-hexahydro-4[2-(hydroxymethyl)pentyl]-7H-pyrrolo-(2,3-d)carbazole-6-carboxylate. TLC (SiO2, 1:1 ethyl acetate:hexane) *Rf*  = 0.50 (PMA); IR (chloroform max 3620 (OH), 3380 (NH), 1672 (ester C=O) cm-1; NMR (200 MHz, CDCl3) H 9.01, 8.95 (2 s, 1 H), 7.40 -6.75 (m, 9 H), 4.15, 4.08 (2 d, 1 H), 3.80-3.70 (s, m, 4 H), 3.40 (br s, 2 H), 2.95 (t, 2 H), 2.70-2.40 (m, 3 H), 2.10-1.80 (m, 2 H), 1.75-1.50 (m, 2 H), 1.40-0.70 (m, 12 H).

**4,2'-PREF and 4,2'-PARF Methyl 3-Benzyl-1,2,3,3a,4,5-hexahydro-4[2-(*p*-toluenesulfonyloxymethyl)pentyl]-7H-pyrrolo(2,3-d)carbazole-6-carboxylate (64a,b)**. To a solution of 10.85 g (23.6 mmol) of a mixture of 4,2'-PREF and 4,2'-PARF methyl 3-benzyl-1,2,3,3a,4,5-hexahydro-4[2-(hydroxymethyl)pentyl]-7H-pyrrolo(2,3-d)carbazole-6-carboxylate in 45 cm3  of dry pyridine was added 7.40 g (38.8 mmol) of *p*-toluenesulfonyl chloride, followed by 290 mg (2.35 mmol) of 4-dimethylaminopyridine. After stirring at room temperature, under argon, for 26 h, the reaction mixture was diluted with 350 cm3  of dichloromethane, washed with 100 cm3  of 10% ammonium hydroxide solution and 2 x 100 cm3  of saturated brine, dried (Na2SO4), filtered and concentrated. The residue was purified by column chromatography on silica gel to give 11.11 g (76.7%) of a diastereomeric mixture of 4,2'-PREF and 4,2'-PARF methyl 3-benzyl-1,2,3,3a,4,5-hexahydro-4[2-(*p*-toluenesulfonyloxymethyl)pentyl]-7H-pyrrolo(2,3-d)carbazole-6-carboxylate. TLC (SiO2, 1:4 ethyl acetate:hexane) *Rf* = 0.25 (PMA); IR (chloroform) max/cm-1 3385 (NH), 1672 (ester C=O). NMR (200 MHz, CDCl3) H 9.00, 8.95 (2 s, 1 H), 8.85-8.65 (m, 2 H), 7.40-6.80 (m, 11 H), 4.15-4.00 (2 d, 1 H), 3.85-3.65 (m, incl. 2 s at 3.75, 3.76, 4 H); 3.00-2.90 (m, 1 H), 2.83 (s, 1 H), 2.70-2.50 (m, 1 H), 2.40 (s, 3 H), 1.90-1.50 (m, 3 H), 1.10-0.80 (m, 3 H), 0.85 (t, 3 H).

The mixture of tosylates was separated by preparative high pressure liquid chromatography (PrepPak-500 silica, 6.5 L 10% and then 20% ethyl acetate in hexane, 0.25 L/min, 35 atm) to give 3.92 g (35.3% recovery) of predominantly the 4,2'-PARF isomer and 4.45 g (40.1% recovery of predominantly the 4,2'-PREF isomer; mp 113-115 oC. Anal. Calcd for C36H42N2O5S: C, 70.33; H, 6.89; N, 4.56; S, 5.21. Found: C, 69.78; H, 7.07; N, 4.58; S, 7.54.

**6*S* and 6*R* Isomers of 4,6-PARF, 4,2’-PARF Methyl 3-Benzyl-1,2,3,3a,4,5-hexahydro-4[2-(*p*-toluenesulfonyloxymethyl)pentyl]-6-(15-vindolinyl)pyrrolo(2,3-d)carbazole-6-carboxylate**. To a solution of 3.87 g (6.30 mmol) of predominantly 4,2'-PARF methyl 3-benzyl-1,2,3,3a,4,5-hexahydro-4[2-(*p*-toluenesulfonyloxymethyl)pentyl]-7H-pyrrolo(2,3-d)carbazole-6-carboxylate and 0.91 cm3  (0.654 g, 6.46 mmol) of triethylamine in 80 cm3  of dichloromethane at 0 oC, under argon, was added 0.97 cm3  (8.20 mmol) of *tert*-butylhypochlorite. After stirring at 0 oC for 1 h, the reaction mixture was washed with 2  80 cm3  of water and 80 cm3  of saturated brine, dried (Na2SO4), filtered, and concentrated to give 4.00 g (97.9%) of methyl 3-benzyl-6-chloro-1,2,3,3a,4,5-hexahydro-4-[2-*p*-toluenesulfonyloxymethyl)pentyl]pyrrolo-6-carboxylate; NMR(200 MHz, CDCl3) H7.90-7.60 (m, 3 H), 7.50-7.15 (m, 10 H), 4.13 (s, 1 H), 3.99 (s, 3 H), 4.00-3.75 (m, 2 H), 3.30-3.00 (m, 3 H), 2.70 (d, 1 H), 2.45 (s, 1 H), 2.40 (s, 3 H), 2.40-1.50 (m, 6 H), 1.40-1.00 (m, 5 H), 0.85 (t, m, 4 H).

To a solution of 1.94 g (4.25 mmol) of vindoline in 35 cm3  of dichloromethane was added dichloromethane saturated with hydrogen chloride until litmus paper indicated that the solution was less than pH 2. The solvent was removed in vacuo, 30 cm3  of acetone was added and the solution was reconcentrated. The residual white solid hydrogen chloride salt of vindoline was redissolved in 70 cm3  of acetone and added to 4.00 g (6.17 mmol) of the chloroindolenine from above, and 3.70 g (19.0 mmol) of silver tetrafluoroborate was then added and the reaction mixture stirred at room temperature, under argon, for 80 min. After the addition of 45 cm3  of conc. ammonium hydroxide solution, 45 cm3  of water and 45 cm3  of saturated brine, the mixture was extracted with 3  90 cm3  of dichloromethane and the combined extracts were washed with 90 cm3  of saturated brine, dried (Na2SO4), filtered and concentrated under vacuum. The residue was purified by column chromatography on silica gel, eluting with 30% and 50% ethyl acetate in hexane, followed by ethyl acetate, to give 3.04 g (66.9% from vindoline) of the 6*S* and 6*R* isomers of 4,6-PARF, 4,2'-PARF methyl 3-benzyl-1,2,3,3a,4,5-hexahydro-4-[2-(*p*-toluenesulfonyloxymethyl)pentyl]-6-(15-vindolinyl)pyrrolo-(2,3-d)-carbazole-6-carboxylate. TLC (SiO2, 1:1 acetone:hexane) *Rf* = 0.44 (PMA).

**7*S* and 7*R* Isomers of 5,7-PARF, 5,2'-PARF Methyl 3-Benzyl-1,2,3,4,5,6,7,8-octahydro-5-[2-(*p*-toluenesulfonyloxymethyl)pentyl]azonino(6.7-b)indole-7-(15-vindolinyl)-7-carboxylate (66**, **68** **R = C3H7).** To a solution of 2.99 g (2.80 mmol) of the 6*S* and 6*R* isomers of 4,6-PARF, 4,2'-PARF methyl 3-benzyl-1,2,3,3a,4,5-hexahydro-4-[2-(*p*-toluenesulfonyloxymethyl)pentyl]-6-(15-vindolinyl)pyrrolo(2,3-d)carbazole-6-carboxylate in 70 cm3  of glacial acetic acid was added portionwise, under argon, 1.33 g (35.2 mmol) of sodium borohydride. After stirring at room temperature for 30 min, a further 0.332 g (8.78 mmol) of sodium borohydride was added and stirring was continued for 15 min. The reaction mixture was then poured on to ca. 100 g of ice, basified to pH 9-10 with conc. ammonium hydroxide solution, and extracted with 2  100 cm3  followed by 40 cm3  of dichloromethane. The combined extracts were washed with 3  100 cm3  of water and 100 cm3  of saturated brine, dried (Na2SO4), filtered, and concentrated to give 3.08 g of a mixture of the 7*S* and 7*R* isomers of 5,7-PARF, 5,2'-PARF methyl 3-benzyl-1,2,3,4,5,6,7,8-octahydro-5-[2-(*p*-toluenesulfonyloxymethyl)pentyl]azonino(6,7-b)indole-7-(15-vindolinyl)-7-(15-vindolinyl)-7-carboxylate **(66**, **68** **R = C3H7)**. NMR (200 MHz, CDCl3) H 9.84 (s, 1 H), 7.94 (s, 1 H), 6.80-7.66 (m, 13 H), 6.02 (s, 1 H), 5.75 (m, 1 H), 5.40 (s, 1 H), 5.22 (d, 1 H), 3.75 (s, 6 H), 3.68 (s, 1 H), 3.56 (s, 3 H), 2.95-3.30 (m, 4 H), 2.62 (s, 3 H), 2.44-2.48 (m, 2 H), 2.38 (s, 3 H), 2.00 (s, 3 H), 0.85 (t, 3 H), 0.60-0.80 (m, 4 H), 0.56 (t, 3 H). This material was purified by column chromatography on silica gel eluting with increasing concentrations of ethyl acetate in hexane, finally with ethylacetate, to give 1.32 g (44.0%) of the 7*S* isomer (**66**, **R = C3H7**), 1.56 g (52%) of mixed fractions, and 153 mg (5.11%) of the 7*R* isomer (**68**, **R = C3H7**). Rechromatography of the mixed fractions provided additional separated compounds, for a combined total of 1.67 g (55.7%) of the 7*S* isomer of 5,7-PARF, 5,2'-PARF methyl 3-benzyl-1,2,3,4,5,6,7,8-octahydro-5-[2-(*p*-toluenesulfonyloxymethyl)pentyl]azonino(6,7-b)indole-7-(15-vindolinyl)-7-carboxylate (**66**, **R = C3H7**). [TLC (SiO2, ethyl acetate) *Rf* = 0.70 (PMA)] and 0.577 g (14.2%) of the corresponding 7*R* isomer (**68**, **R = C3H7**). [TLC (SiO2, ethyl acetate) *Rf*  = 0.51 (PMA)].

**4'-Deoxy-4'-deethyl-4'*R*-n-propylvinblastine** **(6R)**. A solution of 1.63 g (15.2 mmol) of the 7*S* isomer of 5,7-PARF, 5,2'-PARF methyl 3-benzyl-1,2,3,4,5,6,7,8-octahydro-5-[2-(*p*-toluenesulfonyloxymethyl)pentyl]azonino(6,7-b)indole-7-(15-vindolinyl)-7-carboxylate (**66**) in 225 cm3  of xylene was heated at 140 oC, under argon, for 22 h. After allowing it to cool to room temperature, the solvent was removed in vacuo and the residual solid was washed with 3  450 cm3  of ether to give 1.138 g (69.8%) of the quaternary salt, 6'-benzyl-4'-deoxy-4'-deethyl-4'*R*-n-propyl-vinblastine tosylate (2'*S*, 18'*S*).

The quaternary salt was dissolved in 37.7 cm3  of methanol, 87 mg of 10% Pd-charcoal was added and the mixture was stirred under an atmosphere of hydrogen at room temperature for 5 1/2 h. The reaction mixture was filtered through a plug of Celite, and the plug plus collected solids were washed with methanol. The combined filtrates were concentrated and the residue was redissolved in methanol and rehydrogenated as described above. The crude product, after the second hydrogenation, was dissolved in 300 cm3  of dichloromethane and the resulting solution was washed with 2  180 cm3  of 3% ammonium hydroxide solution and 2  180 cm3  of saturated brine, dried (MgSO4), filtered, and concentrated under vacuum. The residual oil was dissolved in 140 cm3  of toluene and the resulting solution was heated at reflux for 4 h, then concentrated. The residue was purified by two column chromatographies on silica gel, eluting with increasing concentrations of ethyl acetate in hexane, followed by methanol in hexane, to give 460 mg (37.4% ) of 4'-deoxy-4'-deethyl-4'*R*-*n*-propyl-vinblastine. TLC (SiO2, 3:1 ethyl acetate:ethanol) *Rf* = 0.38 (PMA); IR (chloroform) max/cm-1 3465, 2950, 1738, 1630, 1500, 1460, 1430, 1375, 1240, 1030, 675; FABMS 809 (M+ + 1); NMR (200 MHz, CDCl3) H 9.90 (s, 1 H), 8.02 (s, 1 H), 7.52 (d, 1 H), 7.06-7.20 (m, 3 H), 6.74 (s, 1 H), 6.10 (s, 1 H), 5.85 (m, 1 H), 5.46 (s, 1 H), 5.30 (d, 1 H), 3.82 (2 s, 6 H), 3.70 (s, 1 H), 3.64 (s, 3 H), 2.72 (s, 3 H), 2.70 (s, 1 H), 2.12 (s, 3 H), 0.92 (t, 3 H), 0.82 (t, 3 H).

**4'-Deoxy-4'-deethyl-4'*R*-*n*-propyl-vinblastine Methanesulfonate (6R salt)**. To a solution of 200 mg (0.25 mmol) of 4'-deoxy-4'-deethyl-4'*R*-*n*-propylvinblastine (**6R**) in 10 cm3  of dichloromethane, under argon, was added 1.61 cm3  (0.50 mmol) of a solution of 1 cm3  of methanesulfonic acid in 50 cm3  of dichloromethane. The solvent was removed in vacuo, 25 cm3  of anhydrous ether and 3 cm3  of methanol were added to the residue and, after standing overnight at ca. 0 oC, the mixture was reconcentrated. Then 20 cm3  of anhydrous ether was added to the residue and the resulting precipitate was collected by filtration, washed with 2 x 10 cm3  of ether, and dried under vacuum (1.0 mm Hg) to give 207 mg of 4'-deoxy-4'-deethyl-4'*R*-*n*-propylvinblastine methanesulfonate, mp 206o - 207 oC.

**4'-Deoxy-4'-deethyl-4'*R*-*n*-propyl-vincristine (40R)**. A solution of 201.7 mg (0.223 mmol) of 4'-deoxy-4'-deethyl-4'*R*-*n*-propylvinblastine methanesulfonate and 3.1 cm3  (54.2 mmol) of acetic acid in 24 cm3  of dichloromethane was cooled to -72 oC, under argon, and a solution of 80 mg (0.506 mmol) of potassium permanganate and 165 mg (0.624 mmol) of 1,4,7,10,13,16-hexaoxacyclooctadecane in 10 cm3  of dichloromethane was added dropwise over 15 min. After stirring at -71 oC for 45 min, the reaction mixutre was poured into 500 cm3  of 4.5% sodium bisulfite solution at 0 oC and extracted with 3  190 cm3  of cold dichloromethane. The combined extracts were washed with 500 cm3  of cold 8% sodium bicarbonate solution, dried (MgSO4) filtered and concentrated. The residue was purified by column chromatography on silica gel, eluting with increasing concentrations of ethyl acetate in hexane, followed by increasing methanol in ethyl acetate, to give 68.9 mg of 4'-deoxy-4'-deethyl-4'*R*-*n*-propylvincristine, mp 201 - 203 oC. TLC (SiO2, 1:1 acetone) *Rf*  = 0.33 (PMA); IR (KBr): max/cm-1 3450 (braod, NH and OH), 1740 (ester C=O), 1680 (amide C=O).

**4'-Deoxy-4'-deethyl-4'*R-n*-propylvincristine Methanesulfonate (40R Salt)**. To a solution of 68.9 mg (0.084 mmol) of 4'-deoxy-4'-deethyl-4'*R-n*-propylvincristine in 5 cm3  of dichloromethane, under argon, was added 0.55 cm3  (0.170 mmol) of a solution of 1 cm3  of methanesulfonic acid in 50 cm3  of dichloromethane. The reaction mixture was concentrated and the residue was triturated with anhydrous ether. The solid was collected by filtration, washed well with ether, and dried under vacuum (1.0 mm) to give 52.7 mg of 4'-deoxy-4'-deethyl-4'*R-n*-propylvincristine methanesulfonate, mp 213 - 215 oC; IR (KBr): max/cm-1 3430 (NH and OH), 1742 (ester C=O), 1678 (amide C=O), 1217 and 1042 (SO3).

**6*S* and 6*R* Isomers of 4,6-PARF, 4,2'-PREF Methyl 3-Benzyl-1,2,3,3a,4,5-hexahydro-4-[2-(*p*-toluenesulfonyloxymethyl)pentyl]-6-(15-vindolinyl)pyrrolo(2,3-d)carbazole-6-carboxylate**. To a solution of 4.39 g (7.15 mmol) of predominantly 4.2'-PREF methyl 3-benzyl-1,2,3,3a,4,5-hexahydro-4-[2-(*p*-toluenesulfonyloxymethyl)pentyl]-7H-pyrrolo(2,3-d) carbazole-6-carboxylate and 1.03 cm3  (0.74 g, 7.32 mmol) of triethylamine in 80 cm3  of dichloromethane at 0 oC, under argon, was added 1.1 cm3  (9.30 mmol) of *tert*-butylhypochlorite. After stirring at 0 oC for 1 h, the reaction mixture was washed with 2 80 cm3  of water and 80 cm3  of saturated brine, dried (Na2SO4), filtered, and concentrated to give 4.91 g (quantitative) of methyl 3-benzyl-6-chloro-1,2,3,3a,4,5-hexahydro-4-[2-(*p*-toluenesulfonyloxymethyl)pentyl]pyrrolo-6-carboxylate. NMR (200 MHz, CDCl3) H7.85 (d, 2 H), 7.75-7.60 (m, 1 H), 7.50 - 7.20 (m, 10 H), 4.20 (s, 1 H), 3.95 (s, 3 H), 4.00 - 3.75 (m, 2 H), 3.45 (t, 1 H), 3.05 (m, 2 H), 2.65 (d, 2 H), 2.40 (2 s, 4 H), 2.40 - 1.10 (m, 11 H), 0.83 (t, m, 4 H).

To a solution of 2.25 g (4.93 mmol) of vindoline in 35 cm3  of dichloromethane was added dichloromethane saturated with hydrogen chloride until litmus paper indicated that the pH of the solution was less than pH 2. The solvent was removed in vacuo, 30 cm3  of acetone was added and the solution was reconcentrated. The residual white solid, the hydrogen chloride salt of vindoline, was redissolved in 80 cm3  of acetone and added to 4.91 g of the chloroindolenine from above; 4.29 g (22.0 mmol) of silver tetrafluoroborate was then added and reaction mixture was stirred at room temperature, under argon, for 1 h. After the addition of 50 cm3  of conc. ammonium hydroxide, 50 cm3  of water and 50 cm3  of saturated brine, the mixture was extracted with 3  100 cm3  of dichloromethane and the combined extracts were washed with 100 cm3  of dichloromethane and the combined extracts were washed with 100 cm3  of saturated brine, dried (Na2SO4), filtered and concentrated under vacuum. The residue was purified by column chromatography on silica gel with increasing concentrations of ethyl acetate in hexane, followed by increasing concentrations of methanol in ethyl acetate, to give 4.24 g (80.5% from vindoline) of the 6*S* and 6*R* isomers of 4,6-PARF, 4,2'-PREF methyl 3-benzyl -1,2,3,3a,4,5-hexahydro-4-[2(*p*-toluenesulfonyloxymethyl)pentyl]-6-(15-vindolinyl) pyrrolo(2,3-d)-carbazole-6-carboxylate; TLC (SiO2, 1:1 acetone:hexane) *Rf* = 0.44 (PMA).

**7*S* and 7*R* Isomers of 5,7-PARF, 5,2'-PREF Methyl 3-Benzyl-1,2,3,4,5,6,7,8-octahydro-5[2-(*p*-toluenesulfonyloxymethyl)pentyl]azonino(6.7-b)indole-7-(15-vindolinyl)-7-carboxylate (67**, **69** **R = C3H7**). To a solution of 4.19 g (3.92 mmol) of the 6*S* and 6*R* isomers of 4,6-PARF, 4,2'-PREF methyl 3-benzyl-1,2,3,3a,4,5-hexahydro-4-[2-(*p*-toluenesulfonyloxymethyl)pentyl]-6-(15-vindolinyl)pyrrolo(2,3-d)carbaxole-6-carboxylate in 70 cm3  of glacial acetic acid was added portionwise, under argon, 1.87 g (49.4 mmol) of sodium borohydride. After stirring at room temperature for 45 min, a further 0.465 g (12.3 mmol) of sodium borohydride was added and stirring was contineud for 50 min. The reaction mixture was then poured on to ca. 100 g of ice, basified to pH 9-10 with conc. ammonium hydroxide solution, and extracted with 2  100 cm3  followed by 50 cm3  of dichloromethane. The combined extracts were washed with 3  120 cm3  of water and 100 cm3  of saturated brine, dried (Na2SO4), filtered, and concentrated to give 4.15 g (98.9%) of a mixture of the 7*S* and 7*R* isomers of 5,7-PARF, 5,2’-PREF methyl 3-benzyl-1,2,3,4,5,6,7,8-octahydro-5-[2-(*p*-toluenesulfonyloxymethyl)pentyl]azonino(6,7-b)indole-7-(15-vindolinyl)-7-carboxylate (**67**, **69** **R = C3H7**). This material was purified by column chromatography on silica gel with increasing concentrations of ethyl acetate in hexane, followed by increasing concentrations of methanol in ethyl acetate, to give 1.82 g of predominantly the 7*S* isomer, 1.78 g of mixed fractions, and 0.49 g of predominantly the 7*R* isomer. Rechromatography then gave 1.76 g (41.9%) of the 7*S* isomer of 5,7-PARF, 5,2-PREF methyl 3-benzyl-1,2,3,4,5,6,7,8-octahydro-5-[2-(*p*-toluenesulfonyloxymethyl)pentyl]azonino(6,7-b)indole-7-(15-vindolinyl)-7-caraboxylate (**71**), TLC (SiO2, ethyl acetate) *Rf* = 0.72 (PMA), and 0.93 g (22%) of the corresponding 7*R* isomer (**73**), TLC (SiO2, ethyl acetate) *Rf* = 0.62 (PMA); NMR (200 MHz, CDCl3) H 9.93 (s, 1 H), 8.03 (s, 1 H), 7.65 (d, 2 H), 7.45-6.75 (m, 11 H), 6.00 (s, 1 H), 5.82 (d, d, 1 H), 5.45 (s, H), 5.30 (d, 1 H), 3.80 (2 s, 6 H), 3.62 (s, 3 H), 3.30-2.90 (m, 4 H), 2.71 (s, 3 H), 2.42 (s, 3 H), 2.45-2.55 (m, 4 H), 2.08 (s, 3 H), 1.05-0.85 (m, 4 H), 0.85 (t, 3 H), 0.65 (t, 3 H).

**20'-Deoxy-20'-deethyl-20'*S*-*n*-propyl-vinblastine (7R)**. A solution of 1.65 g (15.4 mmol) of the 7*S* isomer of 5,7-PARF, 5,2'-PREF methyl 3-benzyl-1,2,3,4,5,6,7,8-octahydro-5-[2-(*p*-toluenesulfonyloxymethyl)pentyl]azonino(6,7-b)indole-7-(15-vindolinyl)-7-carboxylate (**67**, **R = C3H7**) in 225 cm3  of xylene was heated at 140 oC, under argon, for 22 h. After allowing it to cool to room temperature, the solvent was removed in vacuo and the residual solid was washed with 5  250 cm3  of ether to give 1.09 g (66.1%) of the quaternary salt, 6'-benzyl-4'-deoxy-4'-deethyl-4'S-n-propylvinblastine tosylate (2'*S*, 18'*S*).

The quaternary salt was dissolved in 36 cm3  of methanol, 84 mg of 10% Pd-charcoal was added and the mixture was stirred under an atmosphere of hydrogen at room temperature for 6 1/2 h. The reaction mixture was filtered through a plug of Celite, and the plug and collected solids were washed with methanol. The combined filtrates were concentrated under vacuum and the reside was redissolved in methanol and rehydrogenated as described above. The crude product, after the second hydrogenation, was dissolved in 300 cm3  of dichloromethane and the resulting solution was washed with 2  180 cm3  of 3% ammonium hydroxide solution and 2  180 cm3  of saturated brine, dried (MgSO4), filtered and concentrated under vacuum. The residual oil was dissolved in 120 cm3  of toluene and the resulting solution was heated at reflux for 4 1/2 h and concentrated. The residue was purified by two column chromatographies on silica gel with increasing concentrations of methanol in ethyl acetate, to give 334.5 mg (40.6%) of 4'-deoxy-4'-deethyl-4'*S-n*-propylvinblastine (**7R**).The product crystallized from methanol with mp 192-194 oC. TLC (SiO2, 3:1 ethyl acetate:ethanol) *Rf* = 0.11 (PMA); IR (chloroform) max/cm-1 3465 (NH), 1738 (ester C=O); EI MS *m/z* 808 (M+, 5%), 778 (3), 777 (6), 606 (2), 594 (2), 529 (1), 483 (3), 468 (2), 446 (15), 350 (10), 323 (10), 221 (10), 210 (10), 203 (10), 191 (12), 186 (8), 173 (15), 163 (20), 152 (25), 135 (30), 123 (40), 111 (40), 109 (45), 107 (20), 106 (23), 105 (20), 97 (75), 95 (75), 91 (40), 85 (50), 84 (30), 83 (85), 82 (50), 81 (75), 79 (30), 77 (20), 71 (80), 70 (50), 69 (95), 68 (25), 67 (50), 66 (25), 65 (30), 60 (30), 57 (100), 56 (50), 55 (100); NMR (200 MHz, CDCl3) H9.82 (s, 1 H), 7.95 (s, 1 H), 7.50 (d, 1 H), 7.25-7.10 (m, 3 H), 6.55 (s, 1 H), 6.10 (s, 1 H), 5.87 (dd, 1 H), 5.46 (s, 1 H), 5.32 (d, 1 H), 3.80 (2 s, 6 H), 3.76 (s, 1 H), 3.60 (s, 3 H), 3.45-3.10 (m, 6 H), 2.90-2.75 (m, 3 H), 2.71 (s, 3 H), 2.50-2.10 (m, 3 H), 2.11 (s, 3 H), 1.85-1.70 (m, 3 H), 1.40-1.10 (m, 6 H), 0.90 (t, 3 H), 0.85 (t, 3 H).

**20'-Deoxy-20'-deethyl-20'*S-n*-propylvinblastine methanesulfonate (7R Salt)**. To a solution of 100 mg (0.124 mmol) of 4'-deoxy-4'-deethyl-4'*S-n*-propylvinblastine in 5 cm3  of dichloromethane, under argon, was added 0.81 cm3  (0.24 mmol) of a solution of 1 cm3  of methanesulfonic acid in 50 cm3  of dichloromethane. The solvent was removed in vacuo, 25 cm3  of anyhdrous ether and 3 cm3  of methanol were added to the residue and after standing overnight at ca. 0 oC, the precipitate was collected by filteration, washed with 5 cm3  of ether, and dried under vacuum (1.0 mm Hg) to give 35.9 mg of 4'-deoxy-4'-deethyl-4'*S*-*n*-propyl-vinblastine methanesulfonate, mp 237-239 oC. The combined filtrates from above were concentrated and the residue was triturated with ca. 10 cm3  of ether. The precipitate was collected by filtration, washed with 2 10 cm3  of ether, and dried in vacuo (1.0 mm Hg) to give a further 67.7 mg of 4'-deoxy-4'-deethyl-4'*S*-*n*-propylvinblastine methanesulfonate.

**20'-Deoxy-20'-deethyl-20'*S-n*-propylvincristine (41R)**. A solution of 139.6 mg of 4'-deoxy-4'-deethyl-4'*S-n*-propylvinblastine methanesulfonate and 2.2 cm3  (38.4 mmol) of acetic acid in 19 cm3  of dichloromethane was cooled to -72 oC, under argon, and a solution of 56 mg (0.354 mmol) of potassium permanganate and 115 mg (0.431 mmol) of 1,4,7,10,13,16-hexaoxacyclooctadecane in 8 cm3  of dichloromethane was added dropwise over 10 min. After stirring at -71 oC for 1 h, the reaction mixture was poured into 335 cm3  of 4.5% sodium bisulfite solution at 0 oC and extracted with 6  135 cm3  of cold dichloromethane. The combined extracts were washed with 335 cm3  of cold 8% sodium bicarbonate solution, dried (MgSO4) filtered and concentrated. The residue was purified by column chromatography on silica gel to give 71.0 mg of 4'-deoxy-4'-deethyl-4'*S-n*-propylvincristine, mp 233-235 oC; TLC (SiO2, 1:1 acetone:hexane) *Rf*  = 0.04 (PMA); IR (KBr); max/cm-1 3465 (broad, NH and OH), 1738 (ester C=O), 1678 (amide C=O).

**20'-Deoxy-20'-deethyl-20'*S-n*-propylvincristine methanesulfonate (41R Salt)**. To a solution of 71.0 mg (0.084 mmol) of 4'-deoxy-4'-deethyl-4'*S-n*-propylvincristine in 5 cm3  of dichloromethane under argon, was added 0.57 cm3  (0.176 mmol) of a solution of 1 cm3  of methanesulfonic acid in 50 cm3  of dichloromethane. The reaction mixture was concentrated and the residue was triturated with anhydrous ether. The solid was collected by filtration, washed with ether, and dried under vacuum (1.0 mm) to give 58.2 mg of 4'-deoxy-4'-deethyl-4'*S-n*-propylvincristine methanesulfonate, mp 232o - 233 oC; IR (KBr) max/cm-1 3440 (NH and OH), 1750 (ester C=O), 1680 (amide C=O), 1210 (SO3).

***For Scheme 3:* *20’-Deethyl-20’-deoxy-20’-dimethylvinblastine (12), 20'-Deoxy-20’-diethylvinblastine (13R), and 20'-Deethyl-20'-deoxy-20'-tetramethylenyl vinblastine (21).***

**4,4-Dimethyl-5-oxovaleronitrile (75a).** To a solution of 64.8 g (0.898 mmol, 51.5 cm3  ) of isobutyraldehyde in 300 cm3  of dry dioxane was added 300 mg of hydroquinone (0.0027 mmol) and 60.0 g (1.13 mmol; 1.26 eq; 48.4 cm3  ) of acrylonitrile. To this stirred solution was added all at once a freshly prepared solution of 3 g of NaOH dissolved in 60 cm3  of water and the whole was heated at 65 oC during 150 min. After cooling to 20 oC, removal of the solvents under aspirator vacuum gave a residue, which was partitioned between water and CH2Cl2. After separation, the aqueous layer was extracted three times with CH2Cl2 and the combined organic layers dried over Na2SO4 and concentrated under vacuum (aspirator). The crude residue was distilled under vacuum (81 oC/1 mm Hg) to yield 54 g (49%) of 4,4-dimethyl-5-oxovaleronitrile.

**4,4-Dimethyl-5-hydroxyvaleronitrile (76a).** To a solution of 47 g (0.376 mmol) of 4,4-dimethyl-5-oxovaleronitrile in 350 cm3  of methanol, cooled to 0 oC (ice bath), was added, with vigorous stirring and over 15-20 min, 7.9 g (0.209 mmol; 2.22 hydride equiv.) of NaBH4. After the addition was completed, the solution was stirred an additional 30 min at 0 oC before removing the solvent in vacuo. To the residue was addede CH2Cl2, followed by careful addition of H2O, and finally 1.2 N HCl until pH=1-2 was obtained. The layers were separated and the aqueous one was extracted twice (CH2Cl2), saturated with NaCl and extracted again three times with CH2Cl2. After drying the combined organic layers over Na2SO4 and removing the solvent under vacuum 47.7 g (95%) of the title compound, sufficiently pure for the next step, was obtained as a faint yellow oil. TLC (Silica) *Rf =*  0.26 (ethyl acetate: dichloromethane 1:9), detection with molybdophosphoric acid (yellow spot on blue-green).

**4,4-Dimethyl-5-*tert*-butyldimethylsilyloxyvaleronitrile (77a).** To a solution of 16.13 g (0.127 mmol) of 4,4-dimethyl-5-hydroxyvaleronitrile (**76a**) in 250 cm3 of dry CH2Cl2 was added, at 20 oC, in 2 min, 24.2 cm3 (0.139 mmol) of diisopropylethylamine, followed after 5 min by 25.0 g (0.165 mmol) of solid *tert-*butyldimethylsilyl chloride, all at once. Then, 1.55 g (0.0127 mmol; 0.1 equiv.) of 4-dimethylaminopyridine was added and the whole was stirred at 20 oC during 18 h. After removing the solvent under vacuum the brown residue was taken up in H2O, followed by ethyl ether. The layers were separated and the aqueous one extracted three times with 200 cm3  of ether. The combined organic layers were back extracted with water (100 cm3 ), HCl, 1.2 N (100 cm3 ), 5% KHCO3 (2 x 100 cm3 ), dried over Na2SO4 and concentrated under vacuum to give a faint yellow oil. Distillation at 94 - 97 oC (0.7 mm) gave 21 g (69%) of the title compound. TLC (silica) *Rf* = 0.59 (CH2Cl2), detection with molybdophosphoric acid, blue on yellow.

**4,4-Dimethyl-5-*tert-*butyldimethlysilyloxyvaleraldehyde (74a).** To a cooled (-78 oC) solution of 4.5 g (18.6 mmol) of 4,4-dimethyl-5-*tert*-butyldimethylsilyloxyvaleronitrile (**77a**) in 36 cm3  of dry CH2Cl2 was added dropwise, over 30 min, 20.4 cm3 (20.4 mmol; 1.1 eq) of a 1.0 M solution of diisobutylaluminum hydride in CH2Cl2. After stirring for 2 h at -78 oC, the cooling bath was removed and the solution allowed to warm to 0 oC. To the crude (0 oC) reaction mixture was added 50-60 cm3  of ethyl ether, followed by the *cautious* addition of 10% HCl, until the mixture became strongly acidic (pH =1-2). Separation of the layers and three extractions of the aqueous phase with 100 cm3  ether, drying over MgSO4 and concentrating the combined organic layers gave 3.6 g (79%) of the title compound as a faint yellow oil, sufficiently pure to be used in the next step. TLC: (silica) *Rf =* 0.28 (CH2Cl2/pentane 3:7), detection with Purpald.

**Methyl 3-Benzyl-1,2,3,3a,4,5-hexahydro-4[2,2-dimethyl-3(*tert*-butyldimethylsilyloxy)propyl]-7H-pyrrolo(2,3-d)carbozole-6-carboxylate (78a).** To a solution of 3.5 g (14.3 mmol) of methyl 1,2,3,4,5,6-hexahydroazepino(4,5-b)indole-5-carboxylate (**60**) in 175 cm3  of dry CH2Cl2 at 20 oC was added dropwise, over 2 min., 3.5 g (14.3 mmol, 1 eq.) of 4,4-dimethyl-5-*tert-*butyldimethylsilyloxyvaleraldehyde (**74a**) in 25 cm3  of dry CH2Cl2. Stirring was continued for16 h at 20 oC. The solvent was removed under vacuum and the residue taken up in CHCl3 (150 cm3  ). To this yellow solution was added 2.5 cm3  of benzyl bromide and the mixture was heated at reflux for 18 h. The solvent was removed under vacuum and the residue triturated with pentane to give a gummy solid. The pentane was removed by pipette and the gum triturated twice more with additional pentane. To this residue was added 100 cm3  of dry methanol and 6 cm3  (4 equiv., 0.043 mol) of dry triethylamine, and the whole heated at reflux for 3 h. After cooling, the solvent was removed under vacuum and the residue taken up in CH2Cl2 and washed with 10% Na2CO3. After drying over MgSO4 and concentration under vacuum (aspirator), the residue was absorbed on silica gel (20 g) and applied to the top of a silica gel column (200 g, as a slurry in ethyl ether/pentane 3:7). Elution with the latter solvent mixture afforded 5.6 g (70% overall based on the azepine) of the title compound. TLC: (silica) *Rf* = 0.60 (ethyl ether), detection, CAS, dark blue green with yellow center; MS (EI) *m/z* 561 (4%), 560 (M+, 11), 401 (5), 373 (24), 347 (28), 346 (100), 332 (10), 241 (7), 228 (4), 227 (3), 194 (2), 180 (2), 168 (5), 167 (3), 154 (2), 92 (4), 91 (64), 89 (5), 86 (2), 84 (4), 75 (17), 73 (22), 71 (2), 69 (4), 68 (4), 75 (17), 73 (22), 71 (2), 69 (4), 68 (4), 60 (3), 59 (5), 57 (10), 56 (3), 55 (7), 51 (3).

**3-Benzyl-1,2,3,3a,4,5-hexahydro-4-(2,2-dimethyl-3-hydroxypropyl)-7H-pyrrolo (2,3-d) carbazole-6-carboxylate (79a).** To a solution of 873 mg (1.56 mmol) of methyl-3-benzyl-1,2,3,3a,4,5-hexahydro-4-[2,2-dimethyl-3-(*tert-*butyldimethylsilyloxy)propyl]-7H-pyrrolo(2,3-d)carbazole-6-carboxylate (**78a**) in 30.5 cm3  of THF and 15 cm3  of water was added 5.24 g (20 equiv.) of *p*-toluenesulfonic acid. The reaction mixture was stirred for 90 min at 20 oC and saturated aqueous K2CO3 solution was added until a pH = 9-10 was obtained. Ethyl ether (100 cm3  ) was added and the two layers were separated. The aqueous layer was extracted once with 100 cm3  of ethyl ether and twice with 100 cm3 of CH2Cl2.The combined organic layers were dried over MgSO4 and the solvents evaporated in vacuo.The crude product was purified by column chromatography on silica gel (40 g). Elution with CH2Cl2 followed by ethyl ether gave 0.678 g (97.5%) of the title compound as a white foam. TLC (silica) *Rf* = 0.50 (ethyl ether), detection with CAS (blue with developing yellow center), and UV (long and short wave length); NMR (270 MHz, CDCl3) H0.65, 1.00 (ABX, *J* 13, 2, 2 H), 0.82 (s, 6 H), 1.10-1.68 (brd m, 1 H), 1.63 (d, *J* 3, 1 H), 1.68 (d, *J* 3, 1 H), 2.00 (dd, *J* 12, 3, 2 H), 2.62 (brd s, 2 H), 2.90 (dd, *J* 12, 3, 2 H), 3.00 (s, 1 H), 3.22 (dd, *J* 18, 5, 2 H), 3.70, 4.20 (ABq, *J* 12, 2 H), 3.80 (s, 3 H), 6.80 (d,  *J* 8, 1 H), 6.85 (d, *J* 8, 1 H), 7.00 (d, *J* 8, 1 H), 7.15 (t, *J* 7, 1 H), 7.20-7.45 (m, 5 H), 8.90 (s, 1 H); MS (EI) *m/z* 447 (5%), 446 (M+, 23), 415 (4), 374 (5), 373 (23), 332 (7), 313 (9), 287 (11), 241 (5), 238 (3), 233 (14), 232 (90), 228 (8), 226 (8), 215 (3), 214 (3), 209 (3), 206 (3), 195 (4), 194 (6), 193 (4), 182 (3), 181 (3), 180 (7), 169 (3), 168 (9), 167 (12), 153 (7), 125 (5), 120 (4), 92 (7), 91 (100), 75 (3), 69 (3), 68 (6), 65 (5), 57 (3), 55 (7).

**3-Benzyl-1,2,3,3a,4,5-hexahydro-4-[2,2-dimethyl-3-(*p*-toluenesulfonyloxy)propyl]-7H-pyrrolo(2,3-d)carbazole-6-carboxylate (80a).** To a solution of 669 mg (1.11 mmol) of methyl 3-benzyl-1,2,3,3a,4,5-hexahydro-4-(2,2-dimethyl-3-hydroxypropyl)-7H-pyrrolo(2,3-d)carbozole-6-carboxylate (**79a**) in 60 cm3  of dry CH2Cl2 containing 0.78 cm3  (3.3 equiv., 4.4 mmol) of diisopropyl ethylamine was added portionwise, over 1 h, 1.315 g (3 equiv., 4.03 mmol) of *p*-toluenesulfonic anhydride. When the addition was completed, 16.4 mg (0.1 equiv., 0.134 mmol) of 4-dimethylaminopyridine was added all at once and the reaction mixture stirred for 3 h at 20 oC. After this time, 0.78 cm3  of diethylamine was added, followed by 1.315 g of *p*-toluenesulfonic anhydride, added portionwise over 15-20 min. and the whole was stirred for 24 h. The solvent was removed under vacuum and the residue purified by column chromatography over silica gel (120 g). Elution with CH2Cl2, followed by CH2Cl2/ethyl ether 4:1, afforded 580 mg (72%) of the title compound. TLC (silica) *Rf* = 0.52 (CH2Cl2/ethyl ether, 9:1), detection: CAS (blue with yellow center, then orange); IR (film) max/cm-13386, 2966, 2948, 2915, 2874, 2856, 2795, 1676, 1610, 1495, 1478, 1466, 1437, 1359, 1304, 12921281, 1250, 1203, 1189, 1177, 1156, 1121, 1101, 1080, 1052, 1039, 1020, 964, 911, 844, 814, 777, 736, 700, 688, 667, 648; NMR (270 MHz, CDCl3) HABX, *J*  15, 2,  = 52 Hz, 2 H), 0. 81 (s, 6 H), 1.63 (dd, *J* 12, 2, 1 H), 1.89-2.05 (m, 3 H), 2.39 (s, 3 H), 2.55 (brd s, 3 H), 2.85 (t, *J* 10, 1 H), 2.92 (s, 1 H), 3.52-3.67 (m, 3 H), 3.73, 4.10 (ABq, *J* 12, 2 H), 3.78 (s, 3 H), 6.75-7.40 (m, 11 H), 7.70 (d, *J* 7, 2 H), 8.91 (s, 1 H); MS (EI) *m/z* 600 (M+, 0.7%), 387 (6), 386 (29), 373 (4), 338 (9), 334 (7), 332 (5), 338 (4), 228 (4), 215 (4), 214 (9), 194 (5), 193 (3), 182 (3), 181 (4), 180 (6), 168 (7), 167 (7), 156 (4), 155 (5), 154 (7), 133 (3), 132 (3), 124 (20), 107 (12), 92 (13), 91 (100), 86 (7), 84 (12), 77 (4), 69 (3), 68 (6), 65 (10), 56 (6), 55 (4), 51 (6).

**7*S* and 7*R* 5,7-PARF Methyl 3-Benzyl-1,2,3,4,5,6,7,8-octahydro-5-[2,2-dimethyl-3-(*p*-toluenesulfonyloxy)propyl]-azonino (6,7-b)indole-7-(15-vindolinyl)-7-carboxylate (81a and Diastereomer).** To a solution of 669 mg (1.11 mmol) of methyl 3-benzyl-1,2,3,3a,4,5-hexahydro-4-[2,2-dimethyl-3-(*p*-toluenesulfonyloxy)propyl]-7H-pyrrolo(2,3-d)carbazole-6-carboxylate (**80a**), dissolved in 60 cm3  of dry CH2Cl2 and cooled to 0 oC (ice, H2O), was added 0.195 cm3  (1.41 mmol; 1.3 eq) of triethylamine, followed after 5 min by 0.25 cm3  (1.3 eq; 1.4 mmol) of *tert*-butyl hypochlorite. The reaction mixture was stirred for 15 min at 0 oC and cold water (20 cm3  ) was added. The two layers were separated and the aqueous layer extracted with 20 cm3  of CH2Cl2. The combined organic layers were dried over MgSO4 and the solvent removed under aspirator vacuum to yield the chlorination product as a yellow foam. TLC (silica) *Rf* = 0.64 (ethyl ether), detection: CAS (rust brown). The chlorination product was dissolved in 60 cm3  of dry acetone and cooled at 0 oC (ice-water) and to the cold solution was added 457 mg (0.9 equiv., 1.00 mmol) of vindoline base, followed by 0.493 cm3  (3 equiv., 3.35 mmol) of fluoroboric acid etherate. After stirring for 5 min. 651 mg (3 equiv., 3.34 mmol) of AgBF4 was added, all at once, in the dark. The reaction mixture immediately became heterogeneous and stirring was continued at 0 oC for 30 min. Quenching was effected by adding a solution of 10% NH4OH saturated with NaCl (pH = 10-12). Addition of dichlormethane, separation of the layers and extraction of the aqueous layer three times with 60-70 cm3  of CH2Cl2, drying over MgSO4 and removal of the solvents under aspirator gave a crude product (orange foam), which was used as such in the next step. To the crude product, dissolved at 20 oC in 70 cm3  of dry acetic acid, was added portionwise, over 20-30 min, 615 mg (10 equiv., 11.1 mmol) of KBH4. After addition was completed, stirring was continued for a further 10 min, then the homogeneous reaction mixture was slowly added to 400 cm3  of a mixture of 37% NH4OH and crushed ice. The solution was made strongly basic (pH = 10-12) by adding more NH4OH. Extraction with CH2Cl2, drying over MgSO4 and concentration under aspirator vacuum gave a product, which was purified by flash column chromatography (4.5  11 cm, silica gel, elution with ethyl acetate). Three fractions were obtained: Fraction 1 contained the 7*S* isomer of the title compound. Fraction 2 contained a mixture of the 7*R* and 7*S* isomers. Fraction 3 contained about 200 mg of the 7*R* isomer and about 120 mg of vindoline as judged by NMR. Fraction 1 + fraction 2: 650 mg. Total eluate 970 mg. TLC (Silica gel, ethyl acetate) *Rf* 7*S* isomer = 0.35 (CAS grey-brown), *Rf* 7*R* isomer = 0.27 (CAS grey-brown), *Rf* vindoline = 0.21 (CAS purple).

**4'-Deoxy-4'-deethyl-4',4'-dimethylvinblastine (14'*S*,16'*S*), (12) and its 14'*R*, 16'*R* Diastereomer.** To the combined three fractions of 7*S* and 7*R* 5,7-PARF methyl 3-benzyl-1,2,3,4,5,6,7,8-octahydro-5-(2,2-dimethyl-3-(*p*-toluenesulfonyloxy)propy)-azonino(6,7-b)indole-7-(15-vindolinyl)-7-carboxylate (**81a** and its diastereomer) and vindoline (970 mg) was added 150 cm3  of dry toluene, and the clear solution was heated at reflux (bath temperature = 120 oC) for 5 days, under an argon atmosphere. The solution was cooled and the toluene was removed first under aspirator and finally at 0.01 Torr to give a yellow-orange solid. Ethyl ether was added and the solid scratched vigorously. The ether was removed by using a pipette, or by filtration, and the previous operation repeated three more times to give a faint yellow solid (500 mg, 57.5%). The solid was dissolved in 50 cm3  of dry methanol and 100 mg of 5% Pd on carbon added under argon. This mixture was submitted to hydrogenation under 1 atm of hydrogen at 20 oC. After 4 h, the catalyst was removed by filtration through a pad of Celite 545 and washed with additional methanol (50-60 cm3  ) and CH2Cl2 (100 cm3 ). The solvents were removed under aspirator vacuum and the glassy solid taken up in CH2Cl2 and treated with 10% Na2CO3 until basic (pH = 10-11). Separation of the two layers, extraction of the aqueous layer (three times with CH2Cl2), drying of the combined organic layers over MgSO4 and removal of the solvent under aspirator vacuum gave a product which was purified by column chromatography over silica gel (15 g) using as eluant ethyl acetate/ethanol 85:15, followed by ethyl acetate/ethanol, 7:3. Thus 90 mg of the 16’*R* isomer of the title compounds, followed by 96 mg of the 16’*S* isomer was obtained (49% yield). TLC (silica gel, ethyl acetate/ethanol, 85:15) *Rf* = 0.32 for 16'*R* isomer and *Rf* = 0.09 for 16'*S* isomer (CAS brown). For **12**: NMR (260 MHz, CDCl3) H0.83 (t, *J* 7, 3 H), ), 0.96 (s, 3 H), 1.26 (s, 3 H), 1.30-1.55 (m, 5 H), 1.56-2.10 (m, 3 H), 2.11 (s, 3 H), 2.11-2.68 (m, 5 H), 2.68 (s, 1 H), 2.72 (s, 3 H), 2.75-3.57 (m, 10 H), 3.61 (s, 3 H), 3.61-3.80 (m, 2 H), 3.76 (s, 1 H), 3.80 (s, 6 H), 5.31 (d, *J* 11, 1 H), 5.48 (s, 1 H), 5.87 (dd, *J* 12, 5, 1 H), 6.11 (s, 1 H), 6.59 (s, 1 H), 7.08-7.27 (m, 3 H), 7.53 (d, *J* 7, 1 H), 7.98 (s, 1 H), 9.86 (s, 1 H); MS (EI) *m/z*  794 (M+, 3%), 793 (2), 763 (8), 736 (2), 735 (2), 635 (2), 380 (2), 338 (13), 282 (4), 279 (5), 273 (3), 252 (2), 167 (7), 150 (2), 149 (23), 139 (5), 138 (36), 135 (16), 129 (3), 126 (3), 125 (9), 124 (22), 122 (5), 121 (5), 117 (2), 113 (4), 112 (6), 111 (7), 110 (7), 99 (4), 98 (5), 97 (14), 96 (6), 95 (7), 93 (7), 91 (5), 87 (2), 86 (5), 85 (17), 84 (29), 83 (31), 82 (16), 81 (12), 79 (3), 77 (3), 75 (3), 73 (11), 71 (41), 70 (29), 69 (50), 67 (12), 65 (3), 60 (8), 59 (23), 58 (9), 57 (100), 56 (34), 55 (81), 53 (6), 52 (3), 51 (10), 50 (6).

***Synthesis of 20’-Deoxy-20’-diethylvinblastine (13R)***

**Methyl 3-Benzyl-1,2,3,3a,4,5-hexahydro-4-[2,2-diethyl-3(*p*-toluenesulfonyloxy)propyl]-7-H-pyrrolo(2,3-d)carbazole-6-carboxylate (80b).** Condensation of 10.92 g (44.7 mmol) of the indoloazepine **60** with 4,4-diethyl-5-*tert-*butyldimethylsilyloxyvaleraldehyde (18.27 g, 67.2 mmol) in 120 cm3  of methanol, at room temperature for 48 h, concentration under vacuum at 40 oC and chromatography on 355 g of silica gel 60 (170-230 mesh), eluting with 1.5 L of 1:1 ethyl acetate: hexane and 3 L of ethyl acetate, gave 10.5 g of material in the first 1 L of eluate (impure 11 diastereomer), followed by 15.4 g of the 11  diastereomer (69% yield) of methyl 1,2,4,6-7-tetrahydro-11-[3,3-diethyl-4-(*tert-*butyldimethylsilyloxy)butyl]-3,10b-methanoazepino (4,5-b) indole-5-carboxylate. The latter diastereomer crystallized from 1:1 ether:hexane, m.p. 110-111oC. EI MS *m/z* (relative intensity) 498 (M+, 38), 441 (8), 244 (8), 228 (15), 215 (22), 202 (17), 154 (17); IR (CHCl3) max/cm-1 3440, 3400, 1678, 1648, 1610, 848, 838 cm-1; NMR (200 MHz, CDCl3) H 8.84 (s, 1 H), 7.15 (t, 1 H), 7.14 (d, 1 H), 6.90 (t, 1 H), 6.81 (d, 1 H), 3.82 (d, 1 H), 3.74 (s, 3 H), 3.35 (m, 1 H), 3.31 (d, 1 H), 3.15 (m, 1 H), 3.06 (s, 2 H), 2.90 (m, 1 H), 2.30 (m, 1 H), 2.20 (m, 1 H), 1.38 (m, 1 H), 1.25 (m, 1 H), 1.05 (m, 6 H), 0.80 (s, 9 H), 0.60 (2 t, 6 H), 0.0 (2 s, 6 H). Anal. calcd for C29H46N2O3Si: C, 69.77; H, 9.22; N, 5.61. Found: C, 69.56; H, 9.18; N, 5.75.

A mixture of 3.576 cm3  (29.99 mmol) of benzyl bromide and 12.47 g (24.99 mmol) of the bridged indoloazepine in 500 cm3  of ether was stirred for 21 h, resulting in formation of a quaternary salt. The ether was evaporated under vacuum and the residue dissolved in 170 cm3  of methanol and 4.53 cm3  (32.5 mmol) of triethylamine. After heating at reflux for 3 h, the solution was concentrated under vacuum. Chromatography on 80 g of silica gel 60, eluting with 1 L of hexane and then 4 L of 98:2 hexane: ethyl acetate provided, with the latter solvent, 12.94 g (88%) of the amorphous methyl 3-benzyl-1,2,3,3a,4,5-hexahydro-4-[2,2-diethyl-3(*tert-*butyl dimethylsilyloxy)propyl]-7-H-pyrrolo(2,3-d)carbazole-6-carboxylate (**78b**). NMR (200 MHz, CDCl3) H 8.95 (s, 1 H), 7.50-7.10 (m, 7 H), 6.95-6.80 (m, 2 H), 4.25 (d, 1 H), 3.80 (s, 3 H), 3.65 (d, 1 H), 3.20 (s, 2 H), 3.09 (s, 1 H), 2.90 (m, 1 H), 2.65 (d, 2 H), 2.55 (m, 1 H), 2.05 (m, 2 H), 1.65 (m, 2 H), 1.20 (m, 3 H), 0.80 (s, 9 H), 0.68 (t, 6 H), 0.00 (2 s, 6 H).

The silyl ether **78b** (6.17 g) was dissolved in 84.6 cm3  of acetonitrile with warming, the solution cooled to r.t., and 15.4 cm3  of 48% aqueous HF added. After stirring for 20 h the solution was diluted with 50 cm3  of water and basified with 32 g of sodium carbonate to pH 9.0-9.5. After addition of 125 cm3  of ethyl acetate and filtration, the phases were separared and the aqueous portion extracted with 3  100 cm3  of ethyl acetate. The organic extracts were washed with 1  50 cm3  of water and 3  100 cm3  of brine and dried (MgSO4). Concentration under vacuum gave 4.27 g (86%) of the 3-hydroxypropyl compound **79b**, mp 80-84 oC. IR (CHCl3) max 3625, 3445, 3395, 2795, 1725, 1675, 700 cm-1; NMR (200 MHz, CDCl3) H 8.88 (s, 1 H), 7.44-7.05 (m, 7 H), 6.85-6.80 (m, 2 H), 4.30 (d, 1 H), 3.81 (s, 3 H), 3.67 (d, 1 H), 3.30 (dd, 2 H), 3.02 (s, 1 H), 2.90 (m, 1 H), 2.60 (m, 3 H), 2.00 (m, 2 H), 1.65 (dd, 1 H), 1.58 (s, 1 H), 1.35 (s, 1 H), 1.15 (2 q, 4 H), 0.96 (m, 1 H), 0.68 (2 t, 6 H), 0.55, 0.52 (? 2 t, 6 H, due to ? 4 epi contaminant). EI MS *m/z* 474 (M+, 11%), 373 (22), 256 (6), 238 (9), 228 (13), 215 (15), 209 (6), 202 (6), 194 (8), 182 (10), 169 (12), 168 (16), 167 (13), 153 (20), 130 (10), 120 (13), 104 (14), 105 (24), 91 (88), 88 (23), 84 (14), 83 (13), 81 (11), 77 (25), 73 (30), 72 (15), 70 (51), 69 (25), 68 (11), 67 (13), 65 (10), 61 (65), 57 (28), 56 (18), 55 (37), 51 (15), 45 (15), 43 (100), 32 (28), 29 (17), 28 (90).

A solution of 4.27 g (9.00 mmol) of the 3-hydroxypropyl compound **79b** in 15 cm3  of pyridine was cooled in an ice bath. Addition of 20.5 mg of 4-dimethylaminopyridine and 1.90 g (9.90 mmol) of *p-* toluenesulfonyl chloride was followed by stirring at 0 oC for 1 h, storage at 4 oC for 20 h. Addition of two further portions of 0.38 g (1.99 mmol) of *p-* toluenesulfonyl chloride at 0 oC, and stirring for 24 h at r.t. in each case, resulted in complete conversion of the starting alcohol **79b** (TLC, silica gel 7:3 hexane: ethyl acetate, *Rf* = 0.6 vs 0.5). The reaction mixture was diluted with 20 cm3  of water/ice, followed by addition of 20 cm3  of ammonium hydroxide, and extracted with 150 cm3  and 275 cm3  of dichloromethane. The extracts were washed with 3  75 cm3  of brine, dried (sodium chloride, sodium and magnesium sulfate) and concentrated to provide 5.40 g (96%) of the crude title tosylate **80b**. Chromatography on 80 g of silica gel, eluting with 500 cm3  of hexane, followed by hexane: ethyl acetate (1  9:1, 2  8:2, 1  7:3, 1  6:4 in 500 cm3  portions) provided 3.13 g (55%) of amorphous product. IR (CHCl3) max/cm-1 3440, 3390, 1672, 1609, 1175, 698; NMR (200 MHz, CDCl3) H 8.92 (s, 1 H), 7.70 (d, 2 H), 7.40-7.10 (m, 3 H), 7.15 (t, 1 H), 7.10 (d, 1 H), 6.87 (t, 1 H), 6.81 (d, 1 H), 4.12 (d, 1 H), 3.76 (s, 3 H), 3.62-3.56 (2 d, 3 H), 2.95 (s, 1 H), 2.83 (m, 1 H), 2.65 (s, 2 H), 2.60-2.48 (m, 3 H), 2.39 (s, 3 H), 1.95 (m, 1 H), 1.89 (m, 1 H), 1.63 (dd, 1 H), 1.15 (m, 3 H), 0.89 (dd, 1 H), 0.44 (2 t, 6 H); EI MS *m/z* 628 (M+, 5%), 464 (4), 456 (8), 414 (8), 373 (10), 366 (9), 345 (6), 242 (30), 168 (9), 167 (10), 152 (55), 134 (6), 120 (7), 107 (17), 92 (15), 91 (100), 73 (6), 65 (10), 55 (12), 42 (9), 41 (10), 28 (9). Anal. Calcd for C37H44N2O5S: C, 70.67; H, 7.05; N, 4.45; S, 5.10. Found: C, 70.02; H, 7.47; N, 4.66; S, 5.26.

**20'-Deoxy-20’-diethylvinblastine (13R).** A solution of 3.00 g (4.78 mmol) of the preceding tosylate **80b** in 45 cm3  of dichloromethane and 0.732 cm3  (5.22 mmol) of triethylamine was stirred in an ice bath and 0.607 cm3  (5.22 mmol) of *tert-* butylhypochlorite added dropwise. After 90 min at 0 oC the mixture was partitioned between 50 cm3  of ice-water and 3  50 cm3  of dichloromethane. The organic extracts were washed with 75 cm3  of water, 3  75 cm3  of saturated brine and dried (sodium and magnesium sulfates). Concentration at 30 oC and drying under high vacuum gave 3.2 g (100%) of chloroimines, mp 65-75 oC. IR (CHCl3) max/cm-1 1741, 1360, 1178, 1662; NMR (200 Mhz, CDCl3) H 7.78 (d, 2 H), 7.65 (d, 1 H), 7.45 (d, 1 H), 7.60-7.42 (m, 9 H), 4.17 (s, 2 H), 3.97 (s, 3 H), 3.72 (s, 2 H), 3.52 (t, 1 H), 3.17 (m, 2 H), 3.02 (d, 1 H), 2.47 (s, 1 H), 2.42 (s, 3 H), 2.22-2.12 (m, 1 H), 2.06 (t, 1 H), 1.87 (q, 1 H), 1.56 (d, 1 H), 1.18 (q, 4 H), 0.92 (t, 1 H), 0.68 (t, 6 H);

Vindoline hydrochloride, prepared from 1.57 g (3.44 mmol) of vindoline with excess methanolic HCl, was suspended in 10 cm3  of acetone. The preceding chloro imine (3.10 g, 4.68 mmol) in 10 cm3  of acetone was added and the mixture stirred at r.t. for 15 min. In one portion 2.12 g (10.91 mmol) of silver tetrafluoroborate was added in 10 cm3  of acetone and the mixture stirred in the dark, at r.t., for 1 h. Partitioning between 100 cm3  of 10% ammonium hydroxide, satd. with sodium chloride and 100 cm3  of dichloromethane, and filtration and extraction of the aqueous phase with 2  50 cm3  of dichloromethane, washing of extracts with brine, drying (MgSO4 and Na2SO4) and concentration at 40 oC under vacuum provided 4.56 g of material. Chromatography on 80 g of Silica Gel 60 and elution with 500 cm3  portions of hexane:ethyl acetate 9:1, 8:2, 7:3, 6:4, 5:5, 4:6, 3:7, 2:8, 1:9, with ethyl acetate and with ethyl acetate:ethanol 9:1, 8:2, 7:3, 6:4, 1:1 provided 29 fractions (200-225 cm3 ) followed by two 500 cm3 fractions (#30, 31). On concentrations they yielded: Fractions 7-9, 0.36 g (discarded); 10-18, 0.21 g (discarded); 20-22, 2.00 g; 23-25 1.12 g; 26-29 0.55 g; 30-31, 0.04 g (discarded). Rechromatography of fractions 20-25 on 80 g of silica gel, eluting with 1 L of ethyl acetate, 1 L of 95:5 ethyl acetate: methanol and 500 cm3  of 9:1 ethyl acetate: methanol gave two fractions, 2.09 g and 0.73 g, of mixtures of diasteromeric imines. For first fraction: NMR (200 MHz, CDCl3) H 0.86 (t, 3 H) 0.46 (t, 6 H), 0.38 (t, 3 H); (+) FAB MS (thioglycerol) *m/z* 1083 (MH+, 50%), 905 (25), 904 (10), 903 (20), 628 (20), 414 (35), 261 (100).

To a solution of the first fraction of imines (2.09 g, 1.93 mmol) in 30 cm3  of acetic acid was added 0.774 g (20.5 mmol) of sodium borohydride over 15 min, with stirring in an ice bath. After 1 h the mixture was poured into 50 cm3  of ammonium hydroxide and 50 g of ice and extracted with 2  125 cm3  of dichloromethane. The extracts were washed with 2  75 cm3  of brine, dried (sodium and magnesium sulfates) and concentrated under vacuum to 1.83 g of a foam. Chromatography on 80 g of Silica Gel 60, eluting with 2 L of ethyl acetate, gave 0.84 g in the initial 600 cm3  of eluate, followed by 0.52 g in 350 cm3  and 0.40 g in 400 cm3  of eluate. The initial fraction contained the 16'*S* cleavamine diastereomer and the latter fractions the 16'*R* cleavamine diastereomer.

For the 16'*S* cleavamine **81b:** NMR (200 MHz, CDCl3) H  0.49 (2 t, 6 H), 0.85 (t, 3 H), 2.13 (s, 3 H), 2.42 (s, 3 H), 2.70 (s, 3 H), 3.10-3.45 (m, 6 H), 3.60 (s, 3 H), 3.70 (s, 1 H), 3.80 (2 s, 6 H), 5.30 (d, 1 H), 5.49 (s, 1 H), 5.83 (dd, 1 H), 6.13 (s, 1 H), 6.85-7.75 (m, 15 H), 7.95 (brd s, 1 H), 9.85 (s, 1 H).

A solution of 0.80 g of the above 16'*S* binary tosylate in 100 cm3  of dry xylene was heated at reflux 64 h. Concentration and trituration provided 0.78 g of quaternary salt. This was dissolved in 25 cm3  of methanol and subjected to hydrogenation with 0.08 g of 10% Pd/C at atmospheric pressure and r.t. Concentration and washing of a solution of the residue in 50 cm3  of dichloromethane with 2  25 cm3  of 10% sodium hydroxide, 25 cm3  of water and 2  50 cm3  of saturated brine, drying (Na2SO4, MgSO4) and concentration provided a mixture of atropisomers **82**, **13R**, which was dissolved in 25 cm3  of toluene and heated at reflux for 4 h. Concentration provided 0.66 g of crude product, which was adsorbed onto 5 g of Silica Gel 60 (70-230 mesh) and then poured onto a 1"  18" column of 60 g of silica gel. Elution with 50 cm3  of 8 : 2 and 250 cm3  of 9 : 1 ethyl acetate : hexane was followed by elution with 500 cm3  of ethyl acetate, to provide 0.25 g of product. Rechromatography under the same conditions gave a central cut of 0.195 g, TLC *Rf =* 0.40 (3 : 1 ethyl acetate : hexane or methanol). NMR (200 MHz, CDCl3) H  0.80 (3 t, 9 H), 1.10-1.90 (m, 12 H), 2.10 (s, 3 H), 2.75 (s, 3 H), 3.70-3.50 (m, 8 H), 3.60 (s, 3 H), 3.80 (2 s, 6 H), 5.32 (d, 1 H), 5.49 (s, 1 H), 5.88 (dd, 1 H), 6.10 (s, 1 H), 6.57 (s, 1 H), 7.10-7.40 (m, 3 H), 7.55 (d, 1 H), 7.95 (s, 1 H), 10.20 (s, 1 H).

A methane sulfonate salt was prepared by addition of 0.0455 g of methanesulfonic acid in 1.0 cm3  of ether to a solution of 0.195 g of the binary amine in 10 cm3  of dichloromethane, at r.t. After 1 h the solution was concentrated under vacuum and the residue stirred with 10 cm3  of ether and 1 cm3  of methanol for several hours and then stored at 0 oC. Filtration gave 0.214 g of product. MS (+)FAB - thioglycerol, *m/* 823 (M + 1+, 40%), 469 (12), 425 (10), 411 (10), 343 (15), 341 (15), 339 (15), 328 (15), 283 (17), 272 (24), 258 (24), 228 (22), 226 (23), 224 (25), 222 (25), 214 (30), 212 (25), 202 (227), 200 (35), 198 (32), 194 (35), 193 (20), 188 (70), 186 (30), 184 (30), 182 (30), 180 (40), 174 (40), 172 (40), 170 (40), 169 (30), 168 (55), 166 (75), 158 (35), 157 (33), 156 (45), 155 (22), 154 (40), 152 (100), 144 (90), 130 (75), 124 (70), 122 (100), 121 (60), 120 (35), 115 (45), 108 (100), 107 (55), 106 (40), 105 (75).

***Syntheses of 20’-Tetramethylenyl and 20’-Pentamethylenyl-20’-deethyl-20’-deoxyvinblastine (21, 22) and Their 14’,16’-epi-Diastereomers (Scheme 3).***

**1-(2-Cyanoethy)-1-hydroxymethylcyclopentane (76c).** To a solution of 7.535 g (0.0498 mol) of 1-(2-cyanoethyl)-1-formylcyclopentane in 20 cm3  of methanol, cooled to 0 oC, was added with vigorous stirring, over 30 min, 1.046 g (0.0276 mol) of sodium borohydride. The reaction mixture was stirred for an additional 30 min at 0 oC, and the MeOH was removed at reduced pressure at 42 oC. The resulting heterogeneous slurry was dissolved in 50 cm3  of water and 1 N HCl was added carefully with vigorous stirring until a pH of 1 was obtained. The reaction mixture was then extracted with 3  100 cm3  of dichloromethane. The combined extracts were washed with 2  100 cm3  of sat. NaCl, dried over anhydrous magnesium sulfate and concentrated under vacuum to give a clear, colorless oil. This was distilled at 109-110 oC (0.3 mm) to give 6.477 g (85%) of product. TLC *Rf*=0.35 (1:1 ether /pentane). NMR (270 MHz, CDCl3) H 1.31-1.38 (m, 2 H), 1.43-1.56 (m, 2 H), 1.57-1.64 (m, 4 H), 1.84 (t, *J* 8, 2 H), 2.38 (t, *J* 8, 2 H), 2.90 (s, 1 H), 3.34 (s, 2 H); NMR (67.9 MHz, CDCl3) C 12.9, 24.6, 33.0, 34.1, 46.6, 67.1, 120.4; IR (neat) max/cm-1 3490, 3458, 3444, 3437, 2950, 2870, 2248, 1452, 1424, 1395, 1357, 1332, 1275, 1263, 1234, 1194, 1112, 1056, 1021, 969, 904, 759; EI MS *m/z* 154 (M+, 0.6%), 136 (6), 124 (1), 123 (28), 122 (37), 121 (13), 120 (3), 108 (2), 107 (1), 106 (7), 105 (14), 104 (2), 99 (1), 96 (4), 95 (6), 94 (8), 93 (3), 91 (2), 84 (2), 83 (38), 82 (16), 81 (100), 80 (43), 79 (90), 78 (2), 77 (12), 71 (8), 69 (4), 68 (6), 67 (6), 66 (6), 65 (10), 63 (7), 57 (11), 56 (12), 55 (45), 54 (34), 53 (36), 52 (7), 51 (8).

**1-(2-Cyanoethyl)-1-hydroxymethylcyclohexane (76d)**. The same procedure was used for the generation of the title compound from the corresponding formylcyclohexane. Thus 8.064 g (0.0488 mol) of the aldehyde gave 8.011 g (98%) of product, b.p. 118 oC (0.3 mm); TLC *Rf* = 0.39 (1:1 ether:pentane); NMR (270 MHz, CDCl3) H 1.25-1.36 (m, 4 H), 1.38-1.43 (m, 6 H), 1.77 (t, *J* 3, 2 H), 2.36 (t, *J* 8, 2 H), 2.53 (s, 1 H), 3.40 (s, 2 H); NMR (67.9 MHz, CDCl3) C 11.6, 21.2, 26.0, 31.6, 32.1, 36.8, 76.5, 120.6; IR (neat) max/cm-1 3445, 2934, 2861, 2725, 2672, 2248, 1455, 1424, 1395, 1361, 1304, 1268, 1233, 1189, 1166, 1137, 1117, 1092, 1075, 1049, 1036, 1021, 979, 936, 927, 907, 895, 879, 849, 756; EI MS *m/z* 168 (M+, 5%), 151 (1), 150 (16), 138 (5), 137 (57), 136 (58), 135 (19), 134 (8), 133 (7), 122 (6), 121 (1), 120 (13), 119 (29), 118 (1), 117 (1), 110 (5), 109 (49), 108 (27), 107 (4), 106 (2), 99 (3), 98 (1), 97 (44), 96 (13), 95 (98), 94 (38), 93 (86), 92 (5), 91 (45), 86 (2), 84 (4), 83 (4), 82 (17), 81 (36), 80 (12), 79 (26), 78 (3), 77 (18), 71 (9), 70 (2), 69 (12), 68 (13), 67 (100), 66 (7), 65 (13), 58 (2), 57 (27), 56 (26), 55 (96), 54 (41), 53 (44), 52 (7), 51 (8).

**1-[(*tert*.-Butyl-(dimethyl)silyl)oxymethyl]-1-(2-cyanoethyl)-cyclopentane (77c).** To a solution of 6.17 g (0.0402 mol) of the preceding hydroxy nitrile **76c** in 75 cm3  of dry dichloromethane, cooled to 0 °C, was added 6.2 cm3  (4.483 g, 0.0443 mol) of dry triethylamine. The mixture was stirred at 0 oC for 15 min and then 7.892 g (0.0524 mol) t-butyldimethylsilyl chloride was added in one portion followed by the addition of 0.492 g (4.03 mmol) of 4-(dimethylamino)pyridine in one portion. The reaction mixture was then stirred at r.t. for 16 h. The solvent was evaporated under reduced pressure at 42 oC. The residue was taken up into 100 cm3  of water and extracted with 3  200 cm3  of ether. The ether portions were combined and washed with 100 cm3  of 1 N HCl, 100 cm3  of water and 2  100 cm3  of 5% KHCO3. Drying (MgSO4), concentration, and distillation at 113-114 oC (0.3 mm) gave 9.90 g (92%) of product. TLC *Rf* = 0.72 (CH2Cl2). NMR (270 MHz, CDCl3)H 0.08 (s, 6 H), 0.93 (s, 9 H), 1.31-1.39 (m, 2 H), 1.48-1.58 (m, 2 H), 1.60-1.65 (m, 4 H), 1.84 (t, *J* 8, 2 H), 2.39 (t, *J* 8, 2 H), 3.34 (s, 2 H); NMR (67.9 MHz, CDCl3) C -5.7, 13.2, 18.2, 24.9, 25.8, 34.0, 34.3, 47.0, 68.1, 120.3; IR (neat) max/cm-1 3050, 2953, 2931, 2884, 2859, 2804, 2773, 2247, 1472, 1452, 1426, 1407, 1388, 1362, 1334, 1257, 1218, 1188, 1094, 1040, 1007, 970, 955, 939, 915, 839, 815, 776, 669; EI MS *m/z* 214 (3%), 213 (26), 211 (10), 210 (7), 185 (2), 171 (1), 145 (2), 137 (12), 131 (7), 129 (1), 121 (2), 119 (8), 109 (7), 105 (1), 101 (1), 95 (17), 93 (13), 91 (5), 89 (5), 88 (5), 81 (10), 79 (18), 77 (6), 76 (4), 75 (100), 74 (3), 73 (39), 67 (20), 61 (3), 59 (14), 58 (8), 57 (31), 56 (4), 55 (16), 53 (4).

**1-[(*tert-*Butyl-(dimethyl)silyl)oxymethyl]-1-(2-cyanoethyl)-cyclohexane (77d).** The same procedure was used for the corresponding cyclohexyl homologue. Starting with 7.612 g (0.0455 mol) of the preceding alcohol **76d** gave 8.62 g (75%), b.p. 117-118 oC (0.01mm) of product. TLC *Rf* = 0.81 (CH2Cl2); NMR (270 MHz, CDCl3) H -0.02 (s, 6 H), 0.83 (s, 9 H), 1.23 (m, 4 H), 1.37 (m, 6 H), 1.68 (t, *J =* 8 Hz, 2 H), 2.28 (t, *J* 8, 2 H), 3.30 (s, 2 H); NMR (67.9 MHz, CDCl3) C -5.7, 11.7, 18.1, 21.5, 25.8, 26.2, 32.3, 32.4, 37.0, 68.2, 120.5; IR (neat) max/cm-1 2929, 2857, 2804, 2772, 2739, 2710, 2247, 1472, 1463, 1426, 1407, 1388, 1361, 1255, 1217, 1189, 1139, 1123, 1091, 1024, 1007, 982, 939, 925, 914, 886, 840, 815, 777, 734, 668; EI MS *m/z* 243 (0.8%), 229 (2), 228 (11), 227 (59), 225 (4), 224 (20), 153 (2), 151 (5), 146 (3), 145 (36), 135 (6), 133 (4), 131 (5), 129 ((2), 121 (2), 115 (0.8), 109 (5), 107 (5), 105 (2), 101 (3), 99 (1), 96 (6), 95 (16), 94 (2), 93 (23), 91 (7), 89 (8), 88 (16), 85 (2), 81 (17), 79 (15), 77 (5), 76 (4), 75 (100), 74 (4), 73 (44), 69 (4), 68 (2), 67 (38), 65 (0.8), 61 (3), 60 (1), 59 (19), 58 (18), 57 (85), 56 (10), 55 (29), 54 (3), 53 (5).

**1-[(*tert-*Butyl(dimethyl)silyl)oxymethyl]-1-(3-propanalyl)-cyclopentane (74c).** To a solution of 9.615 g (0.035 mol) of the preceding TBDMS nitrile **77c** in 100 cm3  of dry dichloromethane, cooled to -78oC, was added dropwise over 30 min, 39.5 cm3  (5.62 g, 0.0395 mol) of a 1.0 M solution of diisobutyl aluminum hydride in dichloromethane. The mixture was allowed to stir at -78 oC for 6 h and warmed to 0 oC. Then 200 cm3  of ether was added, maintaining the mixture at 0 oC. Dropwise addition of 70 cm3  of 1 N HCl gave a pH 1-2. The layers were separated, and the aqueous layer was extracted with 3  100 cm3  of ether. The ether extracts were combined, dried (MgSO4) and concentrated under reduced pressure at 42 oC to give a clear, colorless oil, which was distilled at 90 oC (0.3 mm), to provide 7.021 g (72%) of aldehyde. TLC *Rf* = 0.39 (3:7 CH2Cl2; pentane); NMR (270 MHz, CDCl3) C  0.05 (s, 6 H), 0.91 (s, 9 H), 1.27-1.43 (m, 2 H), 1.45-1.52 (m, 2 H), 1.55-1.63 (m, 4 H), 1.73 (t, *J* 8, 2 H ), 2.43 (dt, *J* 8, 2, 2 H), 3.32 (s, 2 H), 9.78 (t, *J* 2, 1 H); NMR (67.9 MHz, CDCl3) C -5.6, 18.2, 25.1, 25.9, 29.8, 34.6, 40.3, 47.0, 68.4, 202.5; IR (neat) max/cm-1 3072, 3056, 2953, 2936, 2885, 2859, 2711, 1728, 1472, 1453, 1411, 1388, 1361, 1256, 1095, 1007, 939, 853, 838, 815, 775, 669; EI MS *m/z* 212 (4%), 211 (16), 210 (100), 167 (2), 155 (7), 136 (5), 128 (1), 115 (1), 105 (1), 100 (3), 99 (1), 98 (2), 95 (1), 93 (1), 91 (1), 89 (6), 88 (6), 85 (1), 81 (6), 80 (1), 79 (7), 77 (4), 76 (4), 75 (82), 74 (2), 73 (26), 68 (1), 67 (9), 61 (2), 60 (1), 59 (9), 58 (7), 57 (13), 56 (1), 55 (5), 54 (2), 53 (2).

**1-[*tert-*Butyl-(dimethyl)silyl)oxymethyl]-1-(3-propanalyl)-cyclohexane (74d).** The same procedure was used for the cyclohexyl homologue. Thus reduction of 8.824 g (0.0328 mol) of nitrile **77d** gave 6.541 g (70%) of aldehyde **74d**; b.p. 98-99 oC (0.3 mm); TLC *Rf* = 0.38 (3:7 CH2Cl2:pentane); NMR (270 MHz, CDCl3) H 0.048 (s, 6 H), 0.91 (s, 9 H), 1.29-1.35 (m, 4 H), 1.36-1.44 (m, 6 H), 1.68 (t, *J* 8, 2 H), 2.39 (td, *J* 2, 9, 2 H), 3.36 (s, 2 H), 9.78 (t, *J*  2, 1 H); NMR (67.9 MHz, CDCl3) C -5.6, 18.2, 21.6, 25.9, 26.4, 27.9, 32.7, 36.8, 38.6, 68.2, 202.7; IR (neat) max/cm-1 2929, 2857, 2710, 2678, 1728, 1472, 1464, 1410, 1389, 1361, 1325, 1308, 1255, 1217, 1189, 1093, 1006, 981, 957, 909, 887, 855. 839. 814, 776, 667 cm-1; EI MS *m/z* (relative intensity) 266 (M+, 0.4), 226 (4), 225 (17), 224 (100), 150 (4), 142 (3), 137 (2), 136 (2), 119 (1), 115 (1), 109 (2), 108 (1), 107 (1), 100 (1), 99 (1), 98 (1), 97 (1), 95 (7), 94 (2), 93 (7), 91 (4), 89 (5), 88 (10), 85 (1), 83 (1), 82 (1), 81 (5), 80 (1), 79 (3), 77 (4), 76 (4), 75 (75), 74 (2), 73 (25), 69 (1), 68 (2), 67 (12), 65 (1), 61 (1), 60 (1), 59 (9), 58 (8), 57 (16), 56 (4), 55 (12), 54 (3), 53 (4).

**Methyl 3-Benzyl-2,3,3a,4,5,7-hexahydro-4-[3-(t.butyl-(dimethyl)silyloxy-2,2-(pentamethlylenyl)-1-propyl]-1H-pyrrolo[2,3d]carbazole-6-carboxylate (78d).** To a solution of 3.217 g (0.01317 mol) of the indoloazepine **60** in 100 cm3  of dry, freshly distilled tetrahydrofuran was added 3.534 g (0.01317 mol) of the above cyclohexylpropionaldehyde **74d**. The solution was allowed to stir for 24 h, at which time the reaction was complete, showing conversion to the bridged azepines with TLC *Rf* = 0.84, 0.35 (1:1 ethyl acetate/pentane). The THF was removed under reduced pressure at 42 oC and the residual oil taken up into 100 cm3  of dichloromethane, and dried (MgSO4). The solvent was evaporated under reduced pressure and the residue taken up into 100 cm3  of dry THF. After addition of 1.57 cm3  (2.25 g, 0.0132 mol) of benzyl bromide the mixture was heated at reflux for 24 h. The THF was evaporated at 42 oC and the residual salt was then disolved in 100 cm3  of dry methanol. After addition of 3.67 cm3  (2.66 g, 0.0263 mol) of triethylamine, the mixture was heated at reflux for 6 days. The solvent was removed under reduced pressure at 42 oC. The residual oil was partitioned between 100 cm3  of dichloromethane and 100 cm3  of 10% NH4OH in saturated brine and the aqueous layer was extracted with 3  100 cm3  of dichloromethane. The combined extracts were dried (MgSO4), concentrated and chromatographed on a 4.0 cm  30.0 cm dry column of SiO2. Elution with ethyl acetate/hexane (1:4), concentration, and drying at 0.005 mm gave 7.619 g (99%) of product, TLC *Rf* = 0.78 (1% MeOH/CH2Cl2), blue green, CAS, fades to orange, yellow center; UV (EtOH) max/nm 199.0, 221, (sh), 296, 325; IR (KBr) max/cm-13383, 3084, 3059, 3028, 2927, 2856, 2790, 1678, 1611, 1541, 1495, 1465, 1436, 1388, 1361, 1344, 1294, 1280, 1249, 1202, 1104, 1092, 1049, 1027, 1006, 981, 956, 937, 919, 899, 836, 813, 773, 743, 698, 667, 635, 661, 583, 558; NMR (62.9 MHz, CDCl3) C -2.7, -2.6, 18.2, 21.7, 21.8, 25.1, 26.0, 26.4, 32.4, 33.2, 33.7, 37.2, 38.4, 43.3, 50.7, 51.0, 55.2, 58.7, 67.8, 75.3, 91.8, 109.1, 120.4, 122.1, 126.9, 127.6, 128.3, 128.5, 138.1, 139.9, 143.1, 166.2, 169.3; NMR (250 MHz, CDCl3) H 0.012 (s, 3 H), 0.029 (s, 3 H), 0.73 (dd, *J* 14, 4, 1 H), 0.88 (s, 9 H), 1.07 (dd, *J* 14, 5, 1 H), 1.10-1.44 (m, 1 H), 1.69 (dd, *J* 12, 4, 1 H), 2.03 (ddd, *J* 6, 12, 1 H), 2.00-2.15 (m, 1 H), 2.58 (ddd, *J* 9, 8, 1 H), 2.64 (d, *J* 3, 2 H), 2.91 (dd, *J* 9, 6, 1 H), 3.11 (s, 1 H), 3.35 (d, *J* 10, 1 H), 3.43 (d, *J* 10, 1 H), 3.81 (s, 3 H), 3.67 (d, *J* 13, 1 H), 4.29 (d, *J* 13, 1 H), 6.86 (d, *J* 7, 1 H), 6.89 (t, *J* 7, 1 H), 7.14 (d, *J* 7, 1 H), 7.18 (t, *J* 8, 1 H), 7.27-7.47 (m, 5 H), 9.01 (brd s, 1 H).

**Methyl 3-Benzyl-2,3,3a,4,5,7-hexahydro-4-[3-(*tert-* butyldimethylsilyloxy)-2,2-(tetramethylenyl)-1-propyl]-1H-pyrrolo[2,3d]carbazole-6-carboxylate (78c)**. Using the same procedure, 3.892 g (0.0144 mol) of the above cyclopentyl propionaldehyde **74c** was condensed with 3.515 g (0.0144 mol) of the indoloazepine **60** and the product benzylated and rearranged to give 8.252 g (98%) of the title product. TLC *Rf* = 0.77 (1% MeOH/CH2Cl2); UV (EtOH) max/nm 200, 225 (sh), 300, 328; IR (KBr) max/cm-1 3385, 3085, 3029, 2950, 2857, 2792, 2738, 2711, 1679, 1613, 1495, 1466, 1437, 1388, 1360, 1344, 1294, 1280, 1249, 1204, 1134, 1104, 1051, 1028, 1019, 1006, 955, 938, 910, 853, 837, 814, 774, 738, 700; NMR (62.9 MHz, CDCl3) C -5.5, -5.5, 18.2, 24.7, 24.9, 25.1, 26.0, 34.2, 35.1, 35.3, 38.8, 43.3, 48.3, 48.3, 50.6, 50.9, 55.3, 58.6, 68.2, 75.1, 91.8, 109.1, 120.4, 122.1, 126.9, 127.6, 128.2, 128.6, 138.2, 139.8, 143.2, 166.0, 169.2; NMR (250 MHz, CDCl3) H 0.047 (s, 3 H), 0.063 (s, 3 H), 1.07 (dd, *J* 14, 4, 1 H), 0.91 (s, 9 H), 1.12 (dd, *J*14, 5, 1 H), 1.22-1.34 (m, 2 H), 1.39-1.54 (m, 6 H), 1.71 (dd, *J* 4, 12, 1 H), 2.08 (ddd, *J* 6, 12, 1 H), 2.13-2.20 (m, 1 H), 2.62 (dt, *J* 9, 4, 1 H), 2.71 (d, *J* 3, 1 H), ), 2.94 (dd, *J* 9, 6, 1 H), 3.14 (s, 1 H), 3.32 (d, *J* 10 , 1 H), 3.42 (d, *J* 10, 1 H, 3.71 (d, *J* 13, 1 H), 3.84 (s, 3 H) 4.32 (d, *J* 13, 1 H), 6.87 (d, *J* 8, 1 H), 6.92 (td, *J* 7,1, 1 H), 7.16 (d, *J* 8, 1 H), 7.20 (td, J 7, 1, 1 H), 7.29-7.50 (m, 5 H), 9.05 (brd s, 1 H).

**Methyl 3-Benzyl-2,3,3a,4,5,7-hexahydro-4-[3-hydroxy-2,2-(pentamethylenyl)-1-propyl]-1H-pyrrolo[2,3d]carbazole-6-carboxylate (79d).** To a solution of 2.011 g (3.346 mmol) of the above tetracyclic cyclohexane propionaldehyde derived condensation product **78d**, in 200 cm3  of anhydrous tetrahydrofuran, was added 7.36 cm3  of a 1 M solution of tetrabutyl ammonium fluoride (2.2 equiv), in one portion. The resulting yellow-orange solution was stirred for 1 h and then a second portion of 7.36 cm3  of the fluoride solution was added. After 1 h TLC indicated complete reaction of the initial silyl ether. Concentration under vacuum at 42 oC gave an orange oil, which was dissolved in 200 cm3  of ethyl acetate and washed with 3  100 cm3  of satd. sodium bicarbonate solution. The aqueous washes were extracted with 100 cm3  of ethyl acetate and the combined organic extracts were dried (MgSO4) and concentrated. Chromatography on silica gel (4  30 cm dry column, eluted with 1:1 ethyl acetate:pentane) gave 1.668 g (92%) of the title alcohol. TLC *Rf* = 0.29 (SiO2, 2% methanol in dichloromethane, CAS purple-blue); UV (ethanol) max/nm 196, 220 (sh), 298, 327; NMR (250 MHz, CDCl3) H0.69 (dd, *J* 15, 4, 1 H), 1.09 (dd, *J* 15, 6, 1 H), 1.22-1.41 (m, 11 H), 1.65 (dd, *J* 12, 5, 1 H), 1.95-2.06 (m, 2 H), 2.56-2.61 (m, 2 H), 2.88 (dd, *J* 9, 6, 1 H), 3.02 (s, 1 H), 3.34-3.48 (m, 2 H), 3.72 (d, *J* 14, 1 H), 3.79 (s, 3 H), 4.18 (d, *J* 14, 1 H), 6.83 (d, *J* 8, 1 H), 6.84 (t, d, *J* 7, 1, 1 H), 6.99 (d, *J* 8, 1 H), 7.15 (t, d, *J* 7, 1, 1 H), 7.23-7.44 (m, 5 H), 8.94 (s, 1 H); NMR (62.9 MHz, CDCl3) C 21.6, 21.7, 25.0, 26.4, 32.1, 33.2, 34.0, 36.7, 38.3, 43.0, 50.8, 51.0, 55.4, 58.6, 68.0, 75.7, 91.7, 109.3, 120.6, 122.1, 127.1, 127.8, 128.3, 128.8, 138.1, 143.2, 139.5, 165.7, 169.2; IR(KBr) max/cm-1 3387, 3085, 3079, 3058, 3028, 2922, 2851, 2792, 1675, 1610, 1495, 1478, 1465, 1453, 1437, 1382, 1344, 1294, 1280, 1249, 1262, 1124, 1104, 1077, 1047, 1028, 978, 956, 917, 878, 854, 797, 772, 745, 699, 668, 655, 634, 584, 558, 529, 518.

**Methyl 3-Benzyl-2,3,3a,4,5,7-hexahydro-4-[3-hydroxy-2,2-(tetramethylenyl)-1-propyl]-1H-pyrrolo[2,3d]carbazole-6-carboxylate (79c).** In analogy to the procedure for the preceding cyclohexenyl analogue, 2.553 g (4.35 mmol) of the cyclopentyl silyl ether derivative **78c** was converted to 1.912 g of the title alcohol (91% yield). TLC *Rf* = 0.29 (SiO2, 2% methanol in dichloromethane, CAS purple-blue); UV (ethanol) max/nm 199, 223, 299, 329; NMR (250 MHz, CDCl3) H 0.78 (dd, *J* 15, 4, 1 H), 1.15 (dd, *J* 15, 6, 1 H), 1.19-1.26 (m, 2 H), 1.32-1.51 (m, 7 H), 1.65 (dd, *J* 12, 5, 1 H), 1.95-2.07 (m, 2 H), 2.54-2.65 (m, 3 H), 2.89 (dd, *J* 9, 6, 1 H), 3.04 (s, 1 H), 3.32 (d, *J* 11, 1 H), 3.43 (d, *J* 11, 1 H), 3.79 (s, 3 H), 4.20 (d, *J* 13, 1 H), 6.81 (d, *J* 7, 1 H), 6.85 (t, *J* 7, 1 H), 7.04 (d, *J* 7, 1 H), 7.14 (t, *J* 8, 1 H), 7.25-7.49 (m, 5 H), 8.87 (s, 1 H); NMR (62.9 MHz, CDCl3) C 24.8, 24.6, 24.9, 33.1, 34.8, 34.9, 35.6, 37.9, 42.7, 48.1, 50.7, 51.0, 55.1, 58.3, 67.6, 75.0, 91.3, 109.2, 120.5, 122.1, 127.0, 127.7, 128.3, 128.7, 137.8, 139.2, 142.9, 165.6, 169.1; IR(KBr) max/cm-1 3387, 3055, 3028, 2948, 2863, 2794, 1673, 1609, 1494, 1478, 1465, 1438, 1382, 1344, 1280, 1249, 1202, 1134, 1104, 1076, 1049, 1027, 956, 923, 851, 797, 772, 738, 701, 668.

**Methyl 3-Benzyl-2,3,3a,4,5,7-hexahydro-4-[3-(*p*-toluenesulfonyloxy)-2,2-(pentamethylenyl)-1-propyl]-1H-pyrrolo[2,3d]carbazole-6-carboxylate (80d).** To a solution of 1.154 g (2.314 mmol) of the preceding cyclohexanyl alcohol **79d** in 100 cm3  of dichloromethane, at 0 oC, was added 0.806 cm3  (5.78 mmol) of triethylamine, followed by dropwise addition of a solution of 1.510 g (4.62 mmol) of *p-*toluenesulfonic anhydride in dichloromethane. After stirring at 0 oC for 30 min and at room temperature for 2 h the reaction mixture was washed with 3  100 cm3  of saturated sodium bicarbonate. Extraction of the aqueous solutions with 3  100 cm3  of dichloromethane, combination of the organic solutions, drying (MgSO4) and concentration under vacuum at 42 oC gave a crude product, which was chromatographed on a 4  30 cm dry column of silica gel. Elution with 1:6 ethyl acetate:pentane gave 1.427 g of the title tosylate (95% yield). TLC *Rf*  =0.48 (silica gel, ethyl acetate; pentane 1:4).

**Methyl 3-Benzyl-2,3,3a,4,5,7-hexahydro-4-[3-(*p*-toluenesulfonyloxy)-2,2-(tetramethylenyl)-1-propyl]-1H-pyrrolo[2,3d]carbazole-6-carboxylate (80c).** Following the preceding procedure with 1.633 g (3.37 mmol) of the cyclopentanyl analogue **79c**, 2.199 g (7.41 mmol) of tosyl anhydride and 0.75 g of triethylamine, 2.017 g of the title tosylate (94% yield) was obtained. NMR (250 MHz, CDCl3) H  0.85 (dd, *J* 15, 4, 1 H), 1.07 (dd, *J* 15, 6, 1 H), 1.20-1.43 (m), 1.66 (dd, *J* 12, 4, 1 H), 1.90-2.03 (m), 2.36 (s, ), 2.50-2.61 (m), 2.85 (dd, *J* 9, 6, 1 H), 2.97 (s, 1 H), 3.62 (d, *J* 13, 1 H), 3.72 (d, *J* 9, 1 H), 3.77 (s, 3 H), 3.82 (d, *J* 9, 1 H), 4.09 (d, *J* 13, 1 H), 6.81 (d, *J* 8, 1 H), 6.86 (t, *J* 8, 1 H), 7.06 (d, *J* 7, 1 H), 7.15 (t, *J* 8, 1 H), 7.22-7.37 (m, 7 H), 7.71 (d, *J* 8, 2 H), 8.92 (s, 1 H); NMR (62.9 MHz, CDCl3) C 21.5, 24.1, 24.3, 24.5, 34.2, 35.2, 35.4, 38.7, 43.0, 46.3, 50.6, 50.9, 55.0, 58.3, 74.4, 74.1, 91.0, 109.2, 120.5, 122.1, 127.0, 127.8, 128.2, 128.7, 129.7, 132.9, 137.7, 139.3, 142.9, 144.5, 165.7, 169.1; IR (KBr) max/cm-1 3382, 3058, 3029, 2949, 2862, 2796, 1674, 1613, 1494, 1478, 1465, 1454, 1437, 1430, 1280, 1249, 1203, 1189, 1176, 1136, 1099, 1050, 1028, 1019, 953, 845, 815, 795, 772, 738, 701, 668.

**20'-Deethyl-20'-deoxy-20'-pentamethylenyl vinblastine (22) and its 14'*R*, 16'*R* Diastereomer.** To a cooled solution of 0.509 g (0.795 mmol) of the racemic spiro 6 tosylate **80d** in 50 cm3  of dichloromethane, at 0 oC, was added 166 µL (1.19 mmol) of triethylamine. After stirring for 5 min, 139 µL (1.19 mmol) of *tert-*butyl hypochlorite was added dropwise. After stirring for 10 min, TLC (1:4 ethyl acetate: pentane, *Rf* = 0.6, rust brown) indicated that the reaction had gone to completion. The reaction mixture (brilliant yellow) was shaken with 50 cm3  of H2O, and the aqueous portion was then extracted with 3  25 cm3  of dichloromethane. The dichloromethane portions were combined, dried (MgSO4) and concentrated under vacuum at 24 oC to give a yellow oil, which became a foam when placed under vacuum (0.05 mm). The foam was dissolved in 40 cm3  of dry acetone, to which vindoline (0.281 g, 0.616 mmol, 0.775 equiv.) was added in one portion. To this yellow colored solution was added 175 µL (1.19 mmol, 1.5 equiv.) of tetrafluoroboric acid diethyl ether complex, to give a purple colored solution. Then, immediately, was added 0.154 g (0.795 mmol) of silver tetrafluoroborate in 2 cm3  of dry acetone. The mixture was stirred under N2, in the dark, for 30 min and then poured into 100 cm3  of 10% NH4OH in satd. brine and extracted with 3  75 cm3  of dichloromethane. The organic layers were combined, dried (MgSO4) and concentreated under vacuum to a deep brown oil, which became a foam under vacuum (0.05 mm). This foam was dissolved in 25 cm3  of glacial acetic acid and 0.428 g (7.95 mmol, 10 equiv.) of potassium borohydride was added with vigorous stirring over 15 min. The reaction mixture was stirred for an additional 5 min. and was then poured onto 50 cm3  of crushed ice, followed by the addition of 50 cm3  of concentrated ammonium hydroxide. The resulting solution was then extracted with 3  100 cm3  of dichloromethane. The extracts were dried (MgSO4) and concentrated under vacuum to give a tan colored oil, which became a foam when placed under vacuum. TLC (EtOAc, *Rf* = 0.62 and *Rf* = 0.43) demonstrated the presence of two binary products. These were separated by low pressure chromotography on silica gel. Elution with ethyl acetate gave, in fraction 20-32 the less polar binary tosylate and in fractions 48-68 the more polar binary tosylate. Concentration of the solvents under vacuum gave, in both cases, clear, colorless oils, which became foams when placed under vacuum (0.05 mm), to provide 0.231 g of the less polar tosylate and 0.362 g of the more polar tosylate. (Overall yield of 87% of **81d** and its 14’*R*, 16’*R* diastereomer, based on the vindoline used).

The less polar 14’ *R,* 16’ *R,* binary tosylate 0.271 g (0.209 mmol) was dissolved in 50 cm3  of dry toluene and heated at reflux. The reaction was monitored by TLC and stopped when all of the starting material had been converted into the corresponding N-benzyl quaternary salt (13 h). At this point all toluene was removed under vacuum and the residue was triturated with dry ether to give 0.203 g of a white solid. This was taken up into 15 cm3  of dry methanol to which was added 0.100 g of 10% Pd-C. The resulting mixture was stirred under an atmosphere of hydrogen until no additional hydrogen uptake was observed (3 h). The reaction mixture was filtered, the residue rinsed with methanol and the combined solutions concentrated under vacuum to give a white foam. This was taken up in 40 cm3  of dichloromethane and extracted with 20 cm3  of 10% ammonium hydroxide in satd. brine. The aqueous portion was extracted with 3  20 cm3  of dichloromethane. The organic portions were combined, dried (MgSO4) and concentrated under vacuum to give a white solid (14', 16'*R* diastereomer of compound **82**). This was taken up in 25 cm3  of dry toluene and heated at reflux for 6 h. The mixture was cooled to room temperature and the toluene removed under vacuum to give a tan residue, which was subjected to centrifugal chromatography on a 4 mm silical gel plate, eluted with 5% methanol in dichloromethane, give 0.131 g (85%) of the 16'*R*, 20' spirocyclohexanyl product (14'*R*, 16'*R* diastereomer of compound **22** as a white solid, after evaporation of the solvent under vacuum. UV(EtOH) max/nm214, 224 (sh), 256, 284 (sh), 290, 298, 308 (sh); NMR (250 MHz, CDCl3) H 0.39 (t, *J* 7, 3 H), 1.06 (d, *J* 14, 1 H), 1.02-1.10 (m, 1 H), 1.27-1.51 (m, 1 H), 1.59 (sept, *J* 8, 1 H), 2.07 (s, 3 H), 2.17-2.21 (m, 2 H), 2.36-2.52 (m, 3 H), 2.57 (d, *J* 13, 1 H), 2.73 (s, 3 H), 2.82 (d, *J* 14, 1 H), 2.87 (d,d *J* 15, 5, 1 H), 3.04-3.11 (m, 2 H), 3.28-3.41 (m, 4 H), 3.43 (s, 1 H), 3.54 (s, 3 H), 3.63 (td, *J* 15, 3, 1 H), 3.79 (s, 1 H), 3.80 (s, 3 H), 3.81 (s, 3 H), 5.24 (d, *J* 10, 1 H), 5.47 (s, 1 H), 5.81 (dd, *J* 4, 10, 1 H), 6.15 (s, 1 H), 6.71 (s, 1 H), 7.11 (td, *J*  1, 7 Hz, 1 H), 7.15-7.21 (m, 3 H), 7.54 (d, 8, 1 H), 8.02 (brd. s, 1 H), 9.72 (brd. s, 1 H); NMR (62.9 MHz, CDCl3) CIR (KBr) max/cm-1 3459, 3031, 2923, 2883, 2847, 2807, 2743, 1740, 1616, 1593, 1500, 1458, 1431, 1370, 1333, 1299, 1246, 1224, 1192, 1173, 1146, 1130, 1107, 1092, 1039, 1022, 1003, 961, 948, 930, 908, 871, 851, 835, 818, 784, 773, 761, 730, 644, 620.

Analogous cyclization of the more polar binary tosylate **81d** (0.362 g, 0.328 mmol) in 50 cm3  of toluene for 4 h at reflux gave 0.35 g of the quaternary salt. For its hydrogenation 120 mg of 10% Pd/C was used. Islolation of the debenzylation product **82** and its conformational inversion by heating in toluene at reflux resulted in 0.21 g (82%) of the 16'*S*, 20'-spirocyclohexanyl product **22**. UV (EtOH) max/nm214, 224 (sh), 260, 289, 297, 304 (sh); NMR (250 MHz, CDCl3) Ht, *J*  7, 3 H), 1.02 (d,m, *J* 14, 2 H), 1.26-1.42 (m, 10 H), 1.57-1.62 (m, 1 H), 1.79-1.83 (m, 2 H), 2.11 (s, 3 H), 2.16-2.22 (m, 2 H), 2.42-2.49 (m, 1 H), 2.61 (d, *J*  11, 1 H), 2.67 (s, 1 H), 2.72 (s, 3 H), 2.83 (d, *J* 16, 1 H), 2.95-2.99 (m, 1 H), 3.08 (d, *J* 11, 1 H), 3.11-3.16 (m, 1 H), 3.29-3.40 (m, 5 H), 3.60 (s, 3 H), 3.66 (brd.t, 1 H), 3.75 (s, 1 H), 3.80 (s, 3 H), 3.81 (s, 3 H), 5.31 (d, *J* 10, 1 H), 5.48 (s, 1 H), 5.86 (dd, *J*  5, 10, 1 H), 6.11 (s, 1 H), 6.57 (s, 1 H), 7.10-7.19 (m, 3 H), 7.53 (d, *J* 8, 1 H), 7.96 (brd.s, 1 H), 9.84 (brd.s, 1 H); NMR (62.9 MHz, CDCl3) CIR (KBr) max/cm-1 3468, 3029, 2924, 2885, 2850, 2809, 2742, 1740, 1616, 1596, 1501, 1458, 1428, 1370, 1333, 1295, 1248, 1225, 1194, 1174, 1143, 1130, 1107, 1091, 1037, 1009, 957, 948, 928, 912, 894, 874, 850, 834, 876, 616, 785, 758, 736, 669, 644.

**20'-Deethyl-20'-deoxy-20'-tetramethylenyl vinblastine (21) and its 14'*R*, 16'*R* Diastereomer**. Starting from the tetracyclic cyclopentenyl tosylate **80c**, and using the preceding procedure for the cyclohexanyl congener, the title compounds were prepared in equivalent yields.

For the 14'*R*, 16'*R* diastereomer of **21** **:** UV(EtOH) max/nm 214, 224 (sh), 256, 284 (sh), 291, 298, 307 (sh); NMR (250 MHz, CDCl3) H  0.40 (t, *J* 7, 3 H), 1.06 (sept, *J* 7, 1 H), 1.16-1.23 (m, 2 H), 1,31-1.40 (m, 2 H), 1.48-1.68 (m, 5 H), 1.85-1.90 (m, 1 H), 2.06 (s, 3 H), 2.16-2.21 (m, 2 H), 2.38-2.48 (m, 4 H), 2.52 (d, *J* 12, 1 H), 2.73 (s, 3 H), 2.77 (d, *J* 17, 1 H), 2.87 (d, *J* 11, 1 H), 3.00-3.06 (m, 2 H), 3.27-3.41 (m, 4 H), 3.48 (d, *J* 17, 1 H), 3.55 (s, 3 H), 3.64 (t, 1 H), 3.78 (s, 1 H), 3.79 (s, 3 H), 3.80 (s, 3 H), 5.2 (d, *J* 10, 1 H), 5.47 (s, 1 H), 5.81 (dd, *J* 5, 10, 1 H), 7.09 (td, *J* 8, 1 H), 7.16 (t, d, *J* 1, 8, 1 H), 7.28 (d, *J* 7, 1 H), 7.52 (d, *J* 8, 1 H), 8.07 (s, 1 H), 9.67 (s, 1 H); NMR (62.9 MHz, CDCl3) C  8.2, 21.0, 24.2, 25.0, 30.7, 31.3, 36.5, 38.5, 39.9, 39.9, 42.5, 42.7, 43.9, 44.7, 48.3, 50.4, 56.8, 52.1, 53.3, 54.6, 55.6, 55.7, 62.1, 66.6, 76.0, 77.2, 79.5, 83.5, 94.2, 110.1, 116.5, 118.3, 118.8, 120.8, 122.0, 123.5, 123.7, 123.9, 129.1, 129.9, 131.7, 134.7, 153.0, 158.0, 170.7, 171.2, 174.4; IR (KBr) max/cm-1 3453, 3044, 2946, 2883, 2863, 2848, 2806, 1738, 1666, 1614, 1595, 1501, 1455, 1433, 1399, 1371, 1333, 1242, 1226, 1197, 1146, 1134, 1123, 1093, 1083, 1046, 1004, 961, 945, 930, 909, 821, 733, 701, 645.

For the C-14'*S* C-16'*S* diastereomer **21:** UV(EtOH) max/nm 215, 229 (sh), 261, 290, 297, 307 (sh); NMR (250 MHz, CDCl3) H 0.75 (t, *J* 7, 3 H), 0.82 (t, 1 H), 1.10-1.18 (m, 2 H), 1.30 (sept. *J* 7, 1 H), 1.37 (q, *J* 6, 1 H), 1.41-1.61 (m, 7 H), 1.68-1.79 (m, 3 H), 2.03 (s, 3 H), 2.10 (d, *J* 14, 1 H), 2.33-2.35 (m, 1 H), 2.42 (d, *J* 12, 1 H), 2.48 (d, *J* 11, 1 H), 2.59 (s, 1 H), 2.64 (s, 3 H), 2.74 (d, *J* 16, 1 H), 2.79 (d, *J* 12, 1 H), 2.94-3.03 (m, 2 H), 3.18-3.24 (m, 2 H), 3.30 (ddd, *J* 16, 5, 1, 1 H), 3.38-3.46 (m, 2 H), 3.52 (s, 3 H), 3.66 (s, 1 H), 3.72 (s, 3 H), 3.73 (s, 3 H), 5.23 (d, *J* 10, 1 H), 5.40 (s, 1 H), 5.78 (dd, *J* 10, 5, 1 H), 6.04 (s, 1 H), 6.54 (s, 1 H), 6.99-7.08 (m, 3 H), 7.44 (d, *J* 8, 1 H), 7.93 (s, 1 H), 9.73 (s, 1 H); NMR (62.9 MHz, CDCl3) C 8.3, 21.0, 24.3, 24.9, 30.7, 31.3, 38.2, 39.8, 39.9, 42.2, 42.6, 42.6, 42.6, 43.5, 44.5, 47.2, 50.2, 50.3, 52.0, 52.2, 53.2 , 54.8, 55.6, 55.7, 65.6, 76.4, 79.6, 83.3, 94.1, 110.4, 116,5, 118.2, 118.8, 121.0, 122.1, 122.8, 123.6, 124.4, 129.3, 129.8, 131.4, 134.7, 152.6, 157.9, 170.8, 171.6, 174.5; IR (KBr) max/cm-1 3467, 3054, 2949, 2877, 1732, 1657, 1614, 1594, 1503, 1455, 1433, 1396, 1371, 1333, 1294, 1226, 1145, 1131, 1168, 1092, 1078, 1040, 1009, 946, 932, 909, 820, 737, 702, 646.

***For Scheme 4:*** *(****5S,7S) Methyl 1,2,3,4,5,6,7,8-Octahydro-(3,5-tetramethylene)-azonino (6,7-b) indole 7-(15-vindolinyl)-7-carboxylate (23) and Peptide Derivative 176.***

**6-(*tert*-Butyldimethylsilyloxy)hexanol (83, n = 4)**.To a solution of 1,6-hexanediol (11.80 g, 100 mmol), triethylamine (20.20 g, 200 mmol), and DMAP (1.20 g, 10 mmol) in 200 cm3  of CH2Cl2 was added a solution of *tert*-butyldimethylsilylchloride (16.50 g, 110 mmol) in 50 cm3  of CH2Cl2 at 0 °C. After addition, the mixture was allowed to warm to room temperature, stirred overnight, and washed with brine (2 ´ 50 cm3  ). Concentration and chromatography (EtOAc/hex 4:1) gave 12.52 g (54.0%) of the title compound: IR (neat) *n*max/cm-1 3345, 2931, 2858, 1472, 1463, 1388, 1361, 1255, 1098, 1006, 939; NMR (500 MHz, CDCl3) dH 3.62 (m, 4 H), 1.52 (m, 4 H), 1.37 (m, 3 H), 0.89 (s, 9 H), 0.04 (s, 6 H); NMR (125 MHz, CDCl3) dC 63.1, 63.0, 32.8, 26.0, 25.6, 25.5, 18.3, -5.3; MS m/z 233 (M+1+, 100%), 175 (14), 141 (4), 105 (5), 101 (13); high resolution mass spectrum (FAB), calcd for (M+1)+ C12H29O2Si: 233.1938, found 233.1944.

**6-(*tert*-Butyldimethylsilyloxy)hexanal (84).** To a solution of oxalyl chloride (20.5 cm3  , 2 M solution in CH2Cl2) was added dropwise DMSO (7.20 g, 100 mmol) at -78 °C. After being stirred for 10 min, the mixture was added dropwise to a solution of 6-(*tert*-butyldimethylsilyloxy)hexanol (9.52 g, 41 mmol) in 50 cm3  of CH2Cl2, which was then was stirred for 1 h at -78 °C. After addition of triethylamine (21.21 g, 210 mmol), the mixture was warmed to room temperature over 2 h and was poured into 200 cm3  of water. The organic phase was separated, and the aqueous phase was extracted with CH2Cl2 (2 ´ 50 cm3  ). The extracts were dried and concentrated, the residue was purified by chromatography (EtOAc/Hex 4:1) to yield 8.97 g (94.2%) of title compound: IR (neat) *n*max/cm-1 2931, 2858, 2713, 1728, 1472, 1463, 1409, 1388, 1255, 1101, 1006, 939; NMR (500 MHz, CDCl3) dH 9.75 (s, 1 H), 3.59 (t, *J*  5, 2 H), 2.41 (m, 2 H), 1.64 (m, 2 H), 1.52 (m, 2 H), 1.37 (m, 2 H), 0.87 (s, 9 H), 0.03 (s, 6 H); NMR (125 MHz, CDCI3) dC 202.0, 62.6, 43.6, 32.3, 25.7, 25.3, 21.7, 18.1, -5.6; MS m/z 231 (M+1+, 26%), 189 (10), 173 (10), 133 (100), 115 (14); high resolution mass spectrum (FAB), calcd for (M+1)+ C12H27O2Si: 231.1780, found 231.1789.

**3-Benzyl-1,2,3,3a,4,5-hexahydro-4-(4-hydroxybutyl]-7H-pyrrolo (2,3-d) carbazole-6-carboxylate**. Under Ar, a mixture of N-benzylazepine **61** (0.450 g, 2.0 mmol) and 6-(*tert*-butyldimethylsilyloxy)hexanal (**84**, 0.544 g, 2.4 mmol) was brought to 130 °C for 0.5 h. The resulting tetracyclic product was dissolved in 10 cm3  of aqueous CH3CN (95:5) and 1 cm3  of 48% hydrofloric acid was added. After being stirred for 2 h, the mixture was basified with concentrated NH4OH to pH 9 and extracted with CH2Cl2 (3 ´ 15 cm3  ). Chromatography (EtOAc/hex 2:1) gave 0.809 g (97%) of the title compound: TLC *Rf* = 0.45 (SiO2, EtOAc/Hex 2:1, CAS blue); UV (ethanol) lmax/nm 205, 298, 324; IR (neat) *n*max/cm-1 3384, 3058, 3028, 2931, 2856, 2795, 1674, 1609, 1478, 1465, 1437, 1344, 1293, 1279, 1249, 1203, 1128, 1103, 1048, 1077, 909; NMR (500 MHz, CDCl3) dH 8.93 (s, 1 H), 7.40 (d, *J* 7, 2 H), 7.35 (t, *J*  8, 2 H), 7.29 (d, *J*  7, 1 H), 7.15 (t, *J*  8, 1 H), 7.01 (d, *J*  7, 1 H), 6.86 (t, *J*  7, 1 H), 6.82 (d, *J*  8, 1 H), 4.12 (d, *J*  13, 1 H), 3.78 (s, 3 H), 3.75 (d, *J*  13, 1 H), 3.52 (t, *J*  7, 2 H), 2.92 (m, 2 H), 2.65 (m, 2 H), 2.53 (dd, *J* 4, 15, 1 H), 2.04 (m, 1 H), 1.85 (m, 1 H), 1.69 (dd, *J*  5, 12, 1 H), 1.38 (m, 2 H), 1.22 (m, 2 H), 0.91 (m, 1 H), 0.83 (m, 1 H); NMR (125 MHz, CDCl3) dC 168.4, 164.5, 142.5, 138.4, 137.4, 128.4, 127.7, 127.2, 126.5, 121.6, 119.9, 108.7, 89.9, 71.4, 61.7, 57.6, 54.7, 53.1, 50.3, 49.9, 41.6, 38.4, 32.0, 30.2, 22.9, 21.9; MS m/z 433 (M+1+, 55%), 299 (27), 218 (36), 179 (30), 134 (33), 131 (100); high resolution mass spectrum (FAB), calcd for (M+1)+ C27H33N2O3:433.2493, found 433.2497.

**3-Benzyl-1,2,3,3a,4,5-hexahydro-4-[(4-*tosyloxy*)-butyl]-7H-pyrrolo (2,3-d) carbazole-6-carboxylate**. To a mixture of the preceding alcohol (0.432 g, 1.0 mmol), triethylamine (0.202 g, 2.0 mmol), and DMAP (6 mg) was added *p-*toluenesulfonic anhydride (0.489 g, 1.5 mmol). After being stirred for 3 h, the mixture was concentrated, and the residue was subjected to chromatography (EtOAc/Hex 1:5) to afford 0.571 g (97.5%) of the title compound: TLC *Rf* = 0.55 (SiO2, EtOAc/hex 1:5, CAS blue); UV (ethanol) lmax/nm 210, 298, 326; IR (CH2Cl2) *n*max/cm-1 3380, 3058, 3028, 2944, 2918, 2855, 2797, 1675, 1636, 1609, 1477, 1465, 1437, 1358, 1293, 1279, 1249, 1203, 1188, 1176, 1131, 1103; NMR (500 MHz, CDCl3) dH 8.93 (s, 1 H), 7.76 (d, *J* 8, 2 H), 7.35 (m, 4 H), 7.28 (m, 3 H), 7.15 (t, *J*  8, 1 H), 6.99 (d, *J*  8, 1 H), 6.85 (t, *J*  7, 1 H), 6.82 (d, *J*  8, 1 H), 4.06 (d, *J*  13, 1 H), 3.92 (t, *J* 6, 2 H), 3.77 (s, 3 H), 3.75 (d, *J* 13, 1 H), 2.92 (m, 1 H), 2.87 (s, 1 H), 2.62 (m, 2 H), 2.50 (dd, *J*  3, 15, 1 H), 2.42 (s, 3 H), 2.03 (m, 1 H), 1.77 (m, 1 H), 1.67 (dd, *J*  5, 12, 1 H), 1.46 (m, 2 H), 1.18 (m, 2 H), 0.84 (m, 1 H), 0.63 (m, 1 H); NMR (125 MHz, CDCl3) dC 168.0, 164.1, 143.9, 142.5, 138.5, 137.3, 132.7, 129.2, 128.3, 127.7, 127.1, 126.4, 121.6, 119.9, 108.7, 89.8, 71.3, 69.9, 57.5, 54.6, 53.1, 50.2, 49.9, 41.6, 38.2, 29.5, 28.0, 22.4, 21.6, 20.8; MS m/z 587 (M+1+, 4%), 509 (11), 415 (2), 325 (3), 263 (4), 229 (11), 200 (18), 194 (35), 187 (41), 157 (91); high resolution mass spectrum (FAB), calcd for (M+1)+ C34H39N2O5S: 587.2562, found 587.2580.

**5*S*,7*S* and 5*R*,7*R* Methyl 3-Benzyl-1,2,3,4,5,6,7,8-octahydro-5-[(4-tosyloxy)-butyl]-azonino (6,7-b)indole-7-(15-vindolinyl)-7-carboxylate (86 and 87)**. A solution of the preceding tetracyclic tosylate (0.365 g, 0.62 mmol) and Et3N (0.094 g, 0.93 mmol) in 10 cm3  of dry CH2Cl2 was cooled to 0 °C under Ar, and *tert-*butylhypochlorite (78 mL, 0.74 mmol) was added. After being stirred at 0 °C for 5 min, the mixture was partitioned between 10 cm3  of water and 2 ´ 20 cm3  of CH2Cl2. The combined extracts were dried over MgSO4 and concentrated to give crude chloroindolenine. The chloroindolenine and vindoline free base (0.256 g, 0.56 mmol) were dissolved in 10 cm3  of dry acetone, HBF4.Me2O (0.249 g, 1.86 mmol) was added dropwise into the solution at 0 °C, followed by addition of a solution of AgBF4 (0.361 g, 1.80 mmol) in 2 cm3  of dry acetone. After being stirred at 0 °C for 40 min in the dark, the suspension was poured into 10% NH4OH in brine (20 cm3  ), and the mixture was extracted with CH2Cl2 (3 ´ 30 cm3  ). The combined dried (MgSO4) extracts were concentrated under reduced pressure at room temperature. The residue was subjected to reduction in 5 cm3  of AcOH by addition of KBH4 (0.335 g, 6.20 mmol) in portions over 20 min. The mixture was quenched with cold excess 30% NH4OH and extracted with CH2Cl2 (3 ´ 20 cm3  ). The combined extracts were dried over MgSO4. Concentration and chromatography (EtOAc) afforded 0.231 g (39.8% based on vindoline) of coupling product **87** and 0.226 g (38.8% based on vindoline) of coupling product **86**.

For compound **87**: TLC *Rf* = 0.62 (SiO2, EtOAc, CAS brown); [a]D25 = -197.6 (0.16, CH2Cl2); IR (CH2Cl2) *n*max/cm-1 3431, 3032, 2946, 2876, 2847, 2797, 1738, 1614, 1597, 1498, 1459, 1432, 1360, 1337, 1243, 1225, 1188, 1176, 1041; NMR (500 MHz, CDCl3) dH 9.54 (s, 1 H), 8.09 (s, 1 H), 7.79 (d, *J*  8, 2 H), 7.41 (d, *J* 8, 1 H), 7.36 (d, *J*  8, 2 H), 7.26 (m, 1 H), 7.17 (t, *J*  7, 1 H), 7.15-7.04 (m, 6 H), 6.91 (s, 1 H), 6.19 (s, 1 H), 5.76 (m, 1 H), 5.45 (s, 1 H), 5.20 (d, *J*  10, 1 H), 3.93 (t, *J*  6, 2 H), 3.82 (s, 3 H), 3.80 (s, 3 H), 3.77 (s, 2 H), 3.65-3.52 (m, 3 H), 3.58 (s, 3 H), 3.40-3.18 (m, 3 H), 3.03 (m, 1 H), 2.85 ( m, 1 H), 2.75-2.70 (m, 1 H), 2.74 (s, 3 H), 2.53 (m, 1 H), 2.49-2.31 (m, 5 H), 2.44 (s, 3 H), 2.15 (m, 2 H), 2.05 (s, 3 H), 1.60 (m, 1 H), 1.39-1.19 (m, 4 H), 1.15-1.00 (m, 3 H), 0.85 (m, 1 H), 0.38 (t, *J*  7, 3 H); NMR (125 MHz, CDCl3) dC 174.0, 171.1, 169.7, 157.4, 152.4, 143.8, 139.6, 134.3, 132.5, 131.5, 129.2, 128.5, 127.3, 127.1, 125.7, 123.9, 123.4, 123.0, 121.3, 120.9, 118.1, 117.4, 114.2, 109.6, 93.4, 82.9, 78.7, 75.4, 69.9, 65.9, 63.4, 59.5, 55.3, 54.9, 53.0, 52.6, 51.4, 51.3, 50.0, 49.6, 44.0, 42.1, 37.7, 36.1, 34.1, 33.5, 29.9, 28.9, 28.2, 25.29, 22.0, 20.8, 20.2, 13.5, 7.5; MS m/z 872 ((M+-TsOH); high resolution mass spectrum (FAB), calcd for (M+1)+ C59H71N4O11S: 1043.4762, found 1043.4850.

For compound **86**: TLC *Rf* = 0.66 (SiO2, EtOAc, CAS brown); [a]D25 = 18.4 (0.25, CH2Cl2); IR (CH2Cl2) *n*max /cm-1 3470, 3065, 3032, 2967, 2933, 2883, 2796, 1740, 1613, 1597, 1501, 1460, 1432, 1362, 1233, 1188, 1176, 1041; NMR (500 MHz, CDCl3) dH 9.75 (s, 1 H), 8.04 (s, 1 H), 7.74 (d, *J*  8, 2 H), 7.37 (d, *J*  8, 1 H), 7.34 (d, *J*  8, 1 H), 7.18-7.10 (m, 2 H), 7.01 (m, 2 H), 6.89-6.77 (m, 5 H), 6.11 (s, 1 H), 5.80 (dd, *J*  4, 10, 1 H), 5.44 (s, 1 H), 5.29 (m, 1 H), 4.20 (m, 1 H), 3.83 (t, *J*  6, 2 H), 3.78 (s, 3 H), 3.80 (m, 3 H), 3.66 (s, 1 H), 3.62 (s, 3 H), 3.58 (s, 1 H), 3.63 (m, 1 H), 3.31 (m, 1 H), 3.18 (m, 2 H), 3.01 (m, 2 H), 2.70-2.38 (m, 6 H), 2.69 (s, 3 H), 2.45 (s, 3 H), 2.33 (m, 1 H), 2.09 (s, 3 H), 2.02 (m, 1 H), 1.77 (m, 1 H), 1.65 (m, 2 H), 1.59 (m, 1 H), 1.50 (dd, *J* 2, 15, 1 H), 1.40-1.18 (m, 5 H), 1.15 (m, 2 H), 1.05 (m, 1 H), 0.95 (m, 1 H), 0.90 (m, 1 H), 0.82 (t, *J*  6, 3 H); NMR (125 MHz, CDCl3) dC 174.3, 170.8, 169.8, 157.1, 151.9, 143.9, 139.1, 134.0, 132.3, 131.7, 129.1, 128.5, 127.1, 126.9, 125.5, 124.7, 123.6, 122.0, 121.1, 118.0, 117.2, 113.5, 109.5, 93.1, 82.5, 78.8, 75.6, 70.3, 69.7, 64.6, 62.0, 55.7, 54.8, 52.9, 52.3, 52.0, 51.3, 51.2, 49.1, 48.6, 43.8, 41.8, 37.6, 34.7, 34.2, 30.0, 27.5, 24.4, 21.7, 20.7, 20.2, 7.7; MS m/z 872 ((M+1+-TsOH); high resolution mass spectrum (FAB), calcd for (M+1)+ C59H71N4O11S 1043.4762, found 1043.4796.

(**5*S*,7*S*) Methyl 1,2,3,4,5,6,7,8-Octahydro-(3,5-tetramethylene)-azonino (6,7-b) indole 7-(15-vindolinyl)-7-carboxylate (23) and its Atropisomer 90**. The coupling product **86** (300 mg, 0.29 mmol) in 2 cm3  of dry acetonitrile was sealed in a glass tube under Ar and heated to 110 °C for 3 days, after evaporation of the solvent, the residual quaternary salt was then subjected to hydrogenation with 145 mg of 10% Pd(OH)2/C in 5 cm3  of methanol, under 1 atm of hydrogen, for 2 h. Concentration and chromatography (eluting first with EtOAc/MeOH 5:1, then with EtOAc/MeOH/Et3N 10:1:1) afforded the higher energy more polar atropisomer **90** (152 mg, 67.4%) and its lower energy less polar atropisomer **23** (28 mg, 12.3 %). The higher energy atropisomer **90** was completely converted to its lower energy atropisomer **23** by heating in toluene at reflux for 5 h.

For the higher energy atropisomer **90**: TLC *Rf* = 0.35 (SiO2, EtOAc/MeOH/Et3N, 10:1:1, CAS purple); IR (CH2Cl2) *n*max/cm-1 3413, 3027, 2927, 2877, 2850, 2809, 1740, 1616, 1595, 1497, 1458, 1431, 1370, 1334, 1299, 1234, 1144, 1108, 1080, 1041; NMR (500 MHz, CDCl3) (signals in this spectrum were very broad and complex due to the presence of three or more conformers) dH 9.66 (s, br, 1 H), 8.08 (s, br, 1 H), 7.46 (s, br, 1 H), 7.32 (d, *J* 7, 1 H), 7.24-7.02 (m, 3 H), 6.06 (s, br, 1 H), 5.78 (s, br, 1 H), 5.48 (s, br, 1 H), 5.16 (s, br, 1 H), 3.80 (s, 6 H), 3.63 (s, 3 H), 3.50-3.35 (m, 3 H), 3.10-2.50 (m, 13 H), 2.50-2.20 (m, 5 H), 2.07 (s, 3 H), 1.94 (m, 1 H), 1.90-1.35 (m, 6 H), 1.35-1.10 (m, 3 H), 0.29 (m, 3 H); NMR (125 MHz, CDCl3) dC174.6, 171.2, 169.8, 158.8, 152.3, 134.2, 131.6, 129.3, 128.2, 125.4, 123.5, 122.8, 120.6, 118.0, 116.5, 113.1, 110.3, 92.9, 82.6, 78.5, 75.5, 65.5, 56.8, 54.5, 53.4, 52.9, 52.0, 51.8, 51.3, 50.8, 49.7, 42.6, 42.1, 40.1, 38.8, 37.4, 33.4, 29.9, 29.3, 28.7, 24.1, 22.1, 21.0, 20.1, 14.0, 6.9; high resolution mass spectrum (FAB), calcd for (M+1)+ C45H57N4O8: 781.4179, found 781.4147.

For the lower energy atropisomer **23**: TLC *Rf* = 0.56 (SiO2, EtOAc/MeOH, 5:1, CAS brown); [a]D25 = 15.9 (0.18, CH2Cl2); IR (CH2Cl2) *n*max/cm-1 3462, 3050, 2923, 2854, 2804, 1739, 1665, 1614, 1500, 1458, 1433, 1368, 1332, 1234, 1108, 1041; NMR (500 MHz, CDCl3) dH 9.62 (s, 1 H), 7.87 (d, *J*  8, 1 H), 7.10 (m, 3 H), 6.70 (s, 1 H), 6.12 (s, 1 H), 5.85 (dd, *J* 4, 10, 1 H), 5.51 (s, 1 H), 5.29 (m, 1 H), 3.85 (s, 3 H), 3.80 (s, 3 H), 3.60 (s, 3 H), 3.42 (m, 3 H), 3.37 (m, 1 H), 3.21 (dd, *J* 6, 15, 1 H), 3.05 (d, *J*  14, 1 H), 2.90-2.80 (m, 3 H), 2.79-2.74 (m, 2 H), 2.75 (s, 3 H), 2.63 (s, 1 H), 2.45 (m, 2 H), 2.24 (m, 1 H), 2.13 (m, 1 H), 2.10 (s, 3 H), 1.96 (m, 2 H), 1.82 (m, 1 H), 1.63 (m, 3 H), 1.47 (m, 3 H), 1.12 (m, 4 H), 0.95 (m, 1 H), 0.78 (t, *J*  7, 3 H); NMR (125 MHz, CDCl3) dC 173.7, 171.0, 170.0, 157.5, 152.0, 133.9, 131.7, 129.31, 128.6, 123.7, 123.1, 122.6, 121.3, 118.2, 117.6, 115.0, 109.6, 93.6, 82.8, 78.8, 75.7, 65.7, 58.2, 55.9, 55.2, 54.6, 53.0, 52.5, 51.4, 50.27, 49.9, 43.7, 42.1, 37.5, 36.3, 35.7, 33.8, 30.9, 30.1, 28.9, 27.2, 22.5, 20.29, 14.1, 7.7; high resolution mass spectrum (FAB), calcd for (M+1)+ C45H57N4O8: 781.4179, found 781.4181.

(**5*R*,7*R*) Methyl 1,2,3,4,5,6,7,8-Octahydro-(3,5-tetramethylene)-azonino (6,7-b) indole 7-(15-vindolinyl)-7-carboxylate (94)**. A solution of 0.623 g (5.97 mmol) of the 5*R*, 7*R* azonine **87** in 50 cm3  of toluene was heated at reflux for 15 h. The resulting quaternary salt cyclization product (0.590 g, 0.489 mmol) was subjected to hydrogenolysis in methanol with 260 mg of 10% Pd/C, followed by heating in toluene at reflux for 8 h for atropisomeric inversion of any intermediate **95**, to provide 0.297 g (78% yield) of the title product **98**. UV (EtOH) max/nm306, 298, 292, 283, 255, 225 shld., 214; IR (KBr) max/cm-13463, 3032, 2945, 2919, 2878, 2842, 2811, 2764, 1740, 1616, 1595, 1501, 1459, 1431, 1412, 1371, 1336, 1321, 1299, 1244, 1225, 1172, 1152, 1146, 1120, 1107, 1091, 1080, 1039, 1007, 980, 957, 948, 928, 908, 892, 875, 858, 830, 822, 798, 783, 761, 737, 676, 666, 643; NMR (250 MHz, CDCl3) H 0.43 (t, *J* 7, 3 H), 1.08 (sext., *J* 7, 1 H), 1.22-1.30 (m, 3 H), 1.42-1.49 (m, 2 H), 1.59-1.64 (m, 2 H), 1.96 (d, *J* 14, 1 H), 2.07 (s, 3 H), 2.13-2.22 (m, 3 H), 2.35-2.49 (m, 3 H), 2.51 (s, 1 H), 2.74 (s, 3 H), 2.77-2.93 (m, 4 H), 3.12-3.19 (m, 2 H), 3.33-3.49 (m, 3 H), 3.55 (s, 3 H), 3.59 (dd, *J* 5, 11, 1 H), 3.80 (s, 6 H), 5.25 (d, *J* 10, 1 H), 5.46 (s, 1 H), 5.83 (dd, *J* 5, 10, 1 H), 6.16 (s, 1 H), 6.79 (s, 1 H), 7.09 (t, *J* 7, 1 H), 7.15 (t, *J* 7, 1 H), 7.20 (d, *J* 8, 1 H), 7.51 (d, 1 H), 8.05 (s, 1 H), 9.74 (s, 1 H); NMR (62.9 MHz, CDCl3) C .9, 21.0, 23.0, 27.4, 30.4, 31.3, 33.5, 36.6, 36.7, 38.5, 42.6, 44.9, 50.4, 50.6, 52.1, 52.1, 53.3, 53.9, 55.4, 55.6, 56.5, 58.6, 66.1, 76.1, 79.5, 83.5, 94.3, 110.1, 115.0, 118.2, 118.8, 121.4, 121.9, 123.7, 123.9, 124.0, 129.1, 129.9, 130.0, 132,2, 134.6, 152.7, 158.6, 170.6, 171.6, 174.2.

**Hydrazide** **25**. Under Ar, a solution of the vindolinyl binary indole indoline **23** (50 mg, 0.064 mmol) and 0.5 cm3  of anhydrous hydrazine in 40 cm3  of methanol was heated at reflux for 48 h. The solution was added to 30 cm3  of water and the mixture extracted with CH2Cl2 (5 ´ 20 cm3  ). The combined extracts were washed with brine (2 ´ 10 cm3  ), dried and concentrated. The residue was purified by chromatography (EtOAc/MeOH/Et3N 10:1:1) to afford 44 mg (94.1%) of hydrazide **25**: TLC *Rf* = 0.2 (SiO2, EtOAc/MeOH/Et3N 10:1:1, CAS brown); [a]D25 = 47.0 (0.10, CH2Cl2); UV (EtOH): lmax/nm 222, 268; IR (CH2Cl2) *n*max/cm‑1 3459, 3323, 3047, 2920, 2850, 2802, 1734, 1666, 1615, 1503, 1458, 1430, 1370, 1334, 1298, 1228, 1138, 1104, 1081, 1039; NMR (500 MHz, CDCl3) dH 8.18 (s, 1 H), 7.85 (s, 1 H), 7.50 (d, *J*  8, 2 H), 7.10 (m, 3 H), 6.66 (s, 1 H), 6.10 (s, 1 H), 5.83 (s, 2 H), 4.20 (s, 1 H), 3.75 (s, 3 H), 3.80-3.70 (m, 1 H), 3.59 (s, 3 H), 3.51-3.16 (m, 9 H), 3.05 (d, *J* = 13 Hz, 1 H), 2.95-2.70 (m, 6 H), 2.81 (s, 3 H), 2.74 (s, 1 H), 2.52-2.41 (m, 3 H), 2.17-2.04 (m, 3 H), 1.99-1.92 (d, *J* 14 Hz, 1 H), 1.87-1.79 (m, 1 H), 1.78-1.57 (m, 3 H), 1.52-1.47 (m, 3 H), 1.48-1.20 (m, 5 H), 1.21-1.10 (m, 1 H), 1.00-0.89 (m, 2 H), 0.93 (t, *J* 7, 3 H); NMR (125 MHz, CDCl3) dH 174.3, 173.1, 169.7, 157.7, 152.2, 134.3, 132.3, 130.2, 129.0, 123.7, 123.2, 122.5, 121.6, 120.5, 118.5, 118.0, 115.5, 110.1, 93.1, 83.9, 80.3, 77.3, 73.2, 67.1, 58.6, 56.3, 55.5, 55.1, 53.4, 53.2, 52.9, 51.9, 50.3, 49.8, 45.3, 44.7, 41.9, 37.9, 36.7, 36.1, 34.1, 32.9, 31.3, 27.5, 22.9, 14.5, 8.3; high resolution mass spectrum (FAB), calcd for (M+1)+ C42H55N6O6: 739.4186, found 739.4189.

**Peptide Derivative 176 of Vinblastine Congener Deacetyl-23**.To a solution of hydrazide **25** (36 mg, 0.049 mmol) in 2 cm3  of methanol and 3 cm3  of 1 N HCl at -10 °C was added 60 mg (0.87 mmol) of sodium nitrite. After being stirred for 10 min, the solution was poured into 10 cm3  of water, and extracted with CH2Cl2 (3 ´ 10 cm3  ). The combined organic phase was washed with brine ( 5 cm3  ), dried and concentrated to give the vindolinyl acid azide (56 mg, 100%), which was pure enough for 1H NMR analysis: IR (CH2Cl2) *n*max 2132 (CON3) and 1717 (COOMe) cm-1; NMR (500 MHz, CDCl3) dH 7.84 (s, 1 H), 7.51 (d, *J* 8, 1 H), 7.10 (m, 3 H), 6.66 (s, 1 H), 6.14 (s, 1 H), 5.85 (dd, *J* 4, 10, 1 H), 5.76 (d, *J* 10, 1 H), 4.14 (s, 1 H), 3.78 (s, 3 H), 3.68 (s, 1 H), 3.59 (s, 3 H), 3.45-3.25 ( m, 5 H), 3.21 (dd, *J* 5, 11 Hz, 1 H), 3.08 (d, *J*  14 Hz, 1 H), 2.86 (s, 3 H), 2.93-2.70 (m, 4 H), 2.59 (s, 1 H), 2.52-2.41 (m, 2 H), 2.28 (m, 1 H), 2.19-2.11 (m, 2 H), 1.98-1.92 (d, *J* 15, 1 H), 1.92-1.82 (m, 1 H), 1.70-1.55 (m, 4 H), 1.56-1.40 (m, 3 H), 1.40-1.20 (m, 5 H), 0.94 (t, *J* 7, 3 H).

The above acid azide was added to a turbid solution of bridged peptide (CRGNC,11 30 mg, 0.055 mmol) in 4 cm3  of aqueous THF (1:1). The mixture was stirred at 0 °C for 4 days to form a clear solution, and was then concentrated under reduce pressure at room temperature. The residue was triturated with ethyl acetate and filtered, washed with ethyl acetate several times to give crude peptidevindolinylderivative **176**, which was purified by reverse-phase HPLC (semi-preparative C18 column, eluted with successive linear gradients of 5% of acetonitrile to 95% of acetonitrile in water containing 0.1% of trifluoroacetic acid, in 15 min with a flow rate of 20 cm3  /min, detected at 254 nm) to give 30 mg (65.2%) of the vindolinyl peptide **191**: reverse-phase HPLC analysis using above condition (1 cm3  /min flow rate) showed one peak at 3.45 min; high resolution mass spectrum (FAB), calcd for (M+1)+ C60H82N13O13S2: 1256.5596, found 1256.5610.

**Peptide Linked Deactylvinblastine** **177**.Compound **177** was prepared in 66% yield from vinblastine, via deacetylvinblastine acid azide and the bridged peptide CRGNC, using the procedure described above for preparation of the congener **176**: reverse phase HPLC analysis using same condition as for compound **176** showed one peak at 3.36 min; high resolution mass spectrum (FAB), calcd for (M+1)+ C61H84N13O14S2: 1286.5702, found 1286.5698.

***For Scheme 5: Cyclopentyl, Cyclohexyl and Phenyl Carboxaldehyde Intermediates.***

**7,7 - Dichlorobicyclo [3.2.0] hept-2-ene-6-one**.17 A solution of 23.7 cm3  (0.17 mol) of triethylamine in 100 cm3  of pentane was added over 4 h to a refluxing solution of 14.4 cm3  (0.15 mol) of dichloroacetyl chloride and 40 cm3  (0.45 mol) of cyclopentadiene in 200 cm3  of pentane. After addition, the mixture was heated at reflux for 2 h and then allowed to stand overnight at 20 oC. The reaction mixture was then poured into cold water and the organic phase was extracted successively with 5% HCl, 5% NaHCO3, brine and dried over MgSO4. After removal of the pentane in vacuo, the crude product was distilled through a Vigreux column, (b.p. 59-60 oC/0.5 Torr) to give 24.0 g of product (90%). NMR (270 MHz, CDCl3) H6.05 (m, 1 H) 5.81 (m, 1 H) 4.27 (m, 1 H) 4.06 (m, 1 H) 2.77 (m, 1 H), 2.56 (m, 1 H); IR (neat) max/cm-1 3050, 2955, 2920, 2855, 1805, 1608, 752, 730.

**cis-Bicyclo[3.3.0]-oct-6-ene-3-one (97)**. The above dichlorocyclobutanone (15.4 g, 0.088 mol) was treated with 6.0 g (0.14 mol) of ethereal diazomethane, followed by 32 cm3  of methanol. A brisk evolution of N2 occurred. After 1 h the remaining diazomethane was destroyed with acetic acid and the solvent was evaporated. The crude compound was then taken up in 120 cm3  of glacial acetic acid and 35 g (0.54 mol) of zinc dust was added. The reaction mixture was heated to 70 oC for 1.5 h. After allowing the mixture to cool, the zinc was filtered off and the mixture was neutralized by pouring it into NH4OH and ice. The mixture was extracted three times with ether and the organic layer was washed with water, brine, and dried over MgSO4. The solvent was evaporated and the product fractionally distilled (b.p. 85-92 oC/15 Torr) to give 5.64 g of product (53%). TLC (SiO2, CH2Cl2) *Rf* = 0.33 (I2, brown). NMR (270 MHz, CDCl3) H5.74 (m, 1 H) 5.63 (m 1 H), 3.42 (m, 1 H), 2.99 (m, 1 H), 2.74 (m, 1 H), 2.52 (m, 2 H) 2.25 (m, 2 H), 2.04 (m, 1 H); IR (neat) max/cm-1 3050, 2925, 2905, 2850, 1742, 1402, 1158, 722. MS *m/z* 122 (M+ 52%), 107 (8), 93 (8), 80 (72), 79 (100), 78 (12), 77 (32), 66 (20), 53 (11), 51 (13).

**cis-Bicyclo [3.3.0]-octane-3-one**. A solution of the cis-bicyclo [3.3.0] oct-6-ene-3-one (**97**, 6.2 g 0.05 mol) in 150 cm3  of ethylacetate containing 0.50 g of 10% Pd/C was hydrogenated at 25 psi for 1.5 h. The catalyst was removed by filtering through Celite and the solvent evaporated to give 6.5 g of product (100%). TLC (SiO2, CH2Cl2) *R f*= 0.35 (I2, brown); NMR (270 MHz, CDCl3) H2.69 (m, 2 H), 2.46 (m, 2 H), 2.04 (m, 3 H), 1.66 (m, 3 H), 1.41 (m, 2 H); IR max/cm-1 (neat) 2950, 2870, 1740, 1405, 1240, 1165; MS *m/z* 124 (M+, 44%), 96 (14), 95 (20), 82 (35), 81 (100), 80 (36), 79 (18), 68 (40), 67 (84), 55 (44), 54 (80), 52 (44).

**cis-2-[2-Hydroxymethyl)]-cyclopentylacetic Acid Lactone (98).** The cis-bicyclo [3.3.0] octenone (7.0 g, 0.0566 mol) was stirred with NaHCO3 (41.1 g, 0.489 mol) and *m-* chloroperoxybenzoic acid (22.1 g, 0.128 mol) in 250 cm3  of dichloromethane at 20 oC for 24 h. Then 200 cm3  of 10% Na2S2O3 was added and the mixture stirred for 20 min when two phases appeared. The organic phase was separated and washed three times with 10% Na2CO3, 3 times with water and finally with brine. The organic extracts were dried over MgSO4 and the solvent evaporated. The crude product was chromatographed on silica gel with CH2Cl2 to afford 6.24 g of product (79%). TLC (SiO2, CH2Cl2) *R f*= 0.25 (I2, brown); NMR (270 MHz, CDCl3) H4.27 (m, 1 H), 4.04 (m, 1 H), 2.67-2.28 (m, 4 H), 2.01-1.28 (m, 6 H); IR (neat) max/cm-1 2955, 2870, 1745, 1260, 1165, 1080, 1060, 1048; MS *m/z* 141 (M +1+, 16%), 140 (M+, 20), 110 (7), 95 (9), 82 (29), 81 (61), 79 (10), 68 (79), 67 (100), 66 (14), 55 (23), 54 (30), 53 (17).

**Hemiacetal of cis-2-[2-(Hydroxymethyl)]-cyclopentylacetaldehhyde (99).** A solution of 2.1 g (0.0143 mol) of lactone **98** in 50 cm3  of CH2Cl2 was cooled to -78 oC. A 1 M solution of diisobutylaluminum hydride in CH2Cl2 (16 cm3 , 0.016 M) was added dropwise and the mixture allowed to slowly warm to 0 oC. TLC showed the reaction to be complete after 1 h. The mixture was acidified with 1 M HCl to pH 2. The aqueous phase was extracted three times with ether. The combined organic layers were washed with 5% NaHCO3 and brine. Drying over MgSO4 and concentration of the organic extracts gave 1.76 g of product (87%). TLC (SiO2/Et2O) *R f*= 0.55 (CAS, dark brown with heat); NMR (270 MHz, CDCl3) H5.10 (m, 1 H), 4.78 (m, 1 H), 4.05-3.60 (m, 3 H), 3.42 (m, 1 H), 3.17 (m, 1 H), 2.96 (m, 1 H), 2.30-1.25 (m, 6 H); IR (neat) max/cm-1 3400 (broad), 2950, 2870, 1755, 1130, 1085; MS *m/z* 142 (M+, 2%), 125 (26), 96 (19), 95 (18), 94 (9), 93 (4), 86 (13), 84 (21), 82 (10), 81 (100), 79 (20), 68 (53), 67 (87), 66 (12), 55 (34), 54 (42), 53 (14).

**cis-1-Hydroxymethyl-2-(1,3-dithiolan-2-yl-methyl)-cyclopentane (100).** The lactol  **99** (2.73 g, 0.0192 mol) was dissolved in 5 equivalents of ethane-1,2-dithiol (8.1 cm3  , 0.096 mol) and cooled to 0 oC and 12 N HCl (1.2 equiv.) was added dropwise to the reaction mixture. The mixture was allowed to warm to 20 oC and stirred for 2 h. Then 3.6 equiv. of concentrated HCl was added and the mixture stirred for an additional 45 min. The reaction mixture was poured into ice water and extracted three times with CH2Cl2. The combined organic layers were washed with 5% NaHCO3, brine, and dried over MgSO4. The solvent was evaporated and the product was chromatographed on silica gel with CH2Cl2, followed by ether, to yield 3.3 g of product **100** (79%). TLC (SiO2, ether) *Rf* = 0.54 (CAS brown when heated). NMR (270 MHz, CDCl3) H4.55 (m 1 H), 3.65 (m, 1 H), 3.48 (m, 1 H), 3.22 (m, 4 H), 2.20-1.30 (m, 11 H); IR (neat) max/cm-1 3400 (broad), 2950, 2870, 1735, 1430, 1275, 1040; MS *m/z* 218 (M+, 18%), 125 (22), 118 (15), 107 (15), 105 (100), 81 (12), 61 (16).

**cis-[(2-Acetoxymethyl)cyclopentyl]-ethanal (96)**.The alcohol **100** (3.3 g, 0.015 mol) and pyridine (1.47 cm3  , 0.018 mol) were dissolved in 50 cm3  of CH2Cl2 and the solution cooled to 0 oC. Acetyl chloride (1.29 cm3  , 0.018 mol) was added dropwise at 0 oC and then the mixture was allowed to warm to 20 oC. After 0.5 h the reaction was complete as seen by TLC. The mixture was washed with water, 1 M HCl, 5% NaHCO3, brine, and dried over MgSO4. The solvent was evaporated and the crude compound chromatographed with CH2Cl2 on silica gel to give 3.70 g of acetate (95%). TLC (SiO2 CH2Cl2) *Rf* = 0.31 (CAS, orange when heated); NMR (270 MHz, CDCl3) 4.54 (q, 1 H), 4.01 (m, 1 H), 3.90 (m, 1 H), 3.22 (m, 4 H), 2.32 (m, 1 H), 2.06 (s, 3 H), 2.01-1.30 (m, 10 H); IR (neat) max/cm-1 2950, 2865, 1740, 1365, 1235, 1035; MS *m/z* 260 (M+, 2%), 200 (21), 172 (40), 140 (10), 118 (21), 107 (16), 105 (100), 81 (8), 79 (9), 61 (16).

HgO (3.99 g, 0.0184 mol) was added to 30 cm3  of 15% aqueous tetrahydrofuran, followed by 9 cm3  of 35% HBF4 in ether. The above acetate, (1.77 g, 1.72 mmol) in tetrahydrofuran, was added and the mixture stirred for 5 min. Dilution with dichloromethane until a white precipitate formed and filtration through Celite, washing with dichloromethane, gave an organic solution, which was washed with 10% NaI, 5% NaHCO3, and brine. The organic phase was dried over MgSO4 and concentrated. Chromatography on silica gel with hexane/Et2O, 1:1, gave 1.33 g of product **96** (78%). TLC (SiO2, hexane/Et2O 1:2) *R f*= 0.35 (CAS, brown when heated); NMR (270 MHz, CDCl3) 9.78 (s, 1 H), 3.98 (m, 2 H), 2.54 (m, 2 H), 2.35 (m, 2 H), 2.04 (s, 3 H), 1.97-1.54 (m, 4 H), 1.36 (m, 2 H); IR (neat) max/cm-1 2945, 2865, 1740, 1725, 1365, 1235, 1033, 730; MS *m/z* 185 (M+1+, 3%), 141 (12), 125 (39), 124 (25) 123 (15), 96 (15), 95 (57), 82 (20), 81 (100), 80 (58), 79 (19), 68 (21), 67 (61), 55 (23), 54 (19), 53 (10); 2,4-DNP-hydrazone mp 81-82 oC. Anal. calcd. for C16H20N4O6: C, 52.74; H, 5.53; N, 15.38. Found: C, 52.74; H, 5.45; N, 15.34.

**2 and 2 (3a, 7a)-Octahydro-1H-inden-2-ol.** To a solution of 13.4 g (10.0 mmol) of 2-indanol (**112**) in 100 cm3  of dry methanol was added 3.0 g of 5% Rh on carbon under a stream of argon. The solution was shaken in a Parr hydrogenation apparatus under hydrogen at 60 psi and 20 oC for 8 h. The mixture was filtered through Celite 545, rinsing with methanol, and the filtrate concentrated and distilled to give 8.3 g (59%) of the title products, bp 130-131 oC (18 mm); TLC *Rf* = 0.68, 0.60 (SiO2, ethyl ether, molybdophosphoric acid-dark blue); NMR (270 MHz, CDCl3) 4.40 (m, 1 H), 2.00 (m, 5 H), 1.45 (m, 10 H); MS (EI) *m/z* 140 (M+, 2%), 139 (1), 138 (1), 122 (54), 96 (11), 94 (100).

**(3a, 7a)-Octahydro-2H-inden-2-one (113).**23 To 33.6 g (155 mmol) of finely ground pyridinium chlorochromate, stirred in 300 cm3  of dry dichloromethane, was added 7.0 g (50 mmol) of (2 and 2)-octahydro-1H-inden-2-ol in 30 cm3  of dichloromethane. After stirring for 2 h at 20  oC, 300 cm3  of ether was added, the organic solution was decanted from the gummy precipitate and the latter extracted with 5  100 cm3  of ether. The combined organic solutions were filtered through 450 g of silica gel and the latter washed with ether. Concentration of the filtrates and distillation gave 6.6 g (96%) of the title product, bp 110-112 oC (18 mm); TLC *Rf* = 0.29 (SiO2, dichloromethane, molybdophosphoric acid-colorless on blue-green); IR (film) max/cm-1 2923, 2852, 1742, 1449, 1405, 1160; NMR (270 MHz, CDCl3) H 2.30 (m, 6 H), 1.50 (m, 8 H).

A semicarbazone derivative had mp 116-117 oC (reported 115-116 oC).23

**Racemic (4a, 8a)-Octahydro-3H-2-benzopyran-3-one (114).** To a stirred mixture of 3.16 g (23 mmol) of (3a, 7a)-octahydro-2H-inden-2-one (**113**), 17.3 g (207 mmol) of NaHCO3 and 300 cm3  of dichloromethane was added 9.29 g of 85% *m-* chloroperoxybenzoic acid in small portions over 15 min. The reaction mixture was stirred for 17 h at 20 oC, then 200 cm3  of 10% aqueous Na2S2O3 was added and, after 15 min, the organic phase was separated. Extraction of the aqueous portion with 2  100 cm3  of dichloromethane, washing of the combined organic solutions with 10% Na2CO3 and concentration of the dried (MgSO4) solutions under vacuum gave 3.51 g (95%) of the title lactone. TLC *Rf* = 0.40 (SiO2, ethyl ether, iodine brown); IR (film) max/cm-1 2928, 2837, 1731, 1363, 1345, 1331, 1247, 1221, 1192, 1164, 1133, 1118, 1092, 1035, 1005, 953; NMR (270 MHz, CDCl3) H 4.30 (d, *J*  7, 2 H), 2.52 (dd, *J* 6, 9, 2 H), 2.20 (m, 1 H), 1.97 (m, 1 H), 1.50 (m, 8 H); MS (EI) *m/z* 155 (32), 154 (M+, 8%), 136 (11), 124 (8), 109 (3), 95 (24), 82 (49), 81 (39), 67 (100), 54 (62).

**Racemic (4a, 8a)-Octahydro-1H-2-benzopyran-3-ol (115).** To a solution of 2.0 g (13 mmol) of (4a, 8a)(rac)-octahyro-3H-2-benzopyran-3-one (**114**) in a 65 cm3  of dry dichloromethane was added dropwise, over 30 min, 14 cm3  (14.3 mmol) of a 1.0 M solution of diisobutylaluminum hydride in dichloromethane. After further stirring at -78 oC for 45 min the mixture was warmed to 0 oC over 2 h, stirred at 0 oC for 10 min, and then 1.0 M aqueous HCl was added dropwise until pH 0-1 was reached. After addition of 60 cm3  of ether, phase separation and extraction of the aqueous portion with 3  50 cm3  of ether, the combined organic solutions were washed with 5% KHCO3, dried (MgSO4) and concentrated under vacuum to 1.60 g (80%) of the title lactol product. TLC *Rf*  = 0.41 (SiO2, ether, molybdophosphoric acid-blue); NMR (270 MHz, CDCl3, spectrum complicated by mixture of 1 : 2 axial : equatorial OH diastereomers) H 5.20 (t, 1 H, isomer 1, 1/3 H), 4.70 (dd, 1 H, isomer 2, 2/3 H), 4.05 (dd, 1/3 H), 3.75 (d, 2/3 H isomer 2), 3.65 (dd, 2/3 H, isomer 2), 3.45 (dd, 1/3 H, 2/3 H of OH), 3.00 (m, OH, 1/3 H), 2.20-1.30 (m, 12 H).

**Racemic cis-2-(1,3-Dithiolan-2-yl-methyl)-cyclohexylmethanol (116).** To a stirred solution of 1.6 g (10 mmol) of the lactol (4a, 8a)(rac)-octahydro-1H-2-benzopyran-3-ol (**115**) in 4.2 cm3  (49 mmol) of 1,2-ethane dithiol at 0 oC was added dropwise 1.03 cm3  (12 mmol) of 12 N HCl. After 10 min at 0 oC and 2 h at 20 oC, further 3.16 cm3  (36 mmol) of 12 N HCl was added and stirring continued for 40 min. The mixture was then partitioned between ice water and 3  50 cm3  of dichloromethane. The organic extracts were washed with 5% NaHCO3 and brine, dried (MgSO4) and concentrated under vacuum. Column chromatography on 100 g of silica gel, gave 1.50 g of material, eluted with dichloromethane, and 0.74 g (29%) of the title dithiolan, eluted with ether. The dichloromethane eluate (1.5 g) was heated with 40 cm3  of benzene and a crystal of *p-* toluenesulfonic acid at reflux for 3 h. Rechromatography on silica gel and elution with ether gave additional 850 mg (35%) of the title dithiolan (64% total). TLC (SiO2) *Rf*  = 0.11 (dichloromethane), 0.47 (diethyl ether), detection: molybdophosphoric acid-blue; NMR (270 MHz, CDCl3) H 4.60 (2d, *J* 5, 5, 1 H), 3.55 (2dd, *J* 8, 11, 2 H), 3.25 (m, 4 H), 1.90-1.20 (m, 13 H); MS (EI) *m/z* 233 (3%), 232 (M+, 13), 231 (4), 186 (7), 153 (3), 140 (3), 139 (31), 121 (8), 120 (4), 119 (9), 118 (16), 109 (3), 107 (12), 106 (7), 105 (100), 97 (4), 95 (12), 93 (6), 91 (8), 85 (3), 81 (10), 79 (12), 77 (6), 73 (3), 69 (3), 67 (16), 65 (4), 61 (20), 60 (4), 59 (9), 58 (4), 57 (5), 55 (15), 54 (3), 53 (10).

**Racemic cis-2-(1,3-Dithiolan-2-yl-methyl)-cyclohexylmethyl Acetate.** At 0  oC, 290 µL (3.5 mmol) of pyridine was added to 0.740 g (3.18 mmol) of rac-cis-2-(1, 3-dithiolan-2-yl- methyl)-cyclohexylmethanol (**116**) in 5 cm3  of dichloromethane, followed by dropwise addition of 235 µL (3.5 mmol) of acetyl chloride. After 15 min at 0 oC and 30 min at 20 oC, the reaction mixture was partitioned between water and dichloromethane and the organic solution washed with 1.0 N HCl and with 5% KHCO3 solutions, dried (MgSO)4 and concentrated under vacuum to 865 mg (98%) of the title product. TLC *Rf* = 0.48 (SiO2, dichloromethane, I2-brown); NMR (270 MHz, CDCl3) H4.60 (2d, *J* 9, 1 H), 4.05 (2dd, *J* = 7, 8 Hz, 2 H), 3.20 (m, 4 H), 2.07 (s, 3 H), 1.80-1.30 (m, 12 H); MS (EI) *m/z* 274 (M+, 4%), 214 (9), 186 (35), 154 (5), 153 (6), 121 (12), 120 (4), 119 (6), 118 (16), 107 (10), 106 (5), 105 (100), 93 (7), 91 (12), 85 (4), 81 (7), 79 (16), 77 (8), 73 (6), 67 (20), 65 (5), 61 (31), 60 (5), 69 (14), 58 (6), 55 (17), 54 (5), 53 (12).

**Racemic cis-[(2-Acetoxymethyl)cyclohexyl]-ethanal (117).** To a stirred suspension of 432 mg (2.0 mmol) of mercuric oxide in 4.25 cm3  of tetrahydrofuran and 0.75 cm3  of water, at 20 oC, was added 1.14 cm3  of 35% HBF4, followed by 290 mg (1.05 mmol) of the dithiolan rac-cis-[2-(1,3-dithiolan-2-yl-methyl)-cyclohexyl]-methanyl acetate. After 5 min 20 cm3  of dichloromethane was added and the mixture was filtered through Celite 545 with 5  10 cm3  washes of dichloromethane. The organic solution was then shaken with 10% sodium iodide and 5% potassium bicarbonate solutions, dried (MgSO4) and concentrated under vacuum to 200 mg (95%) of the title aldhyde product. TLC *Rf*  = 0.37 (SiO2, dichloromethane, 10% H2SO4 in ethanol, pink).

***For Scheme 6****:* ***(4aS, 7aR, 8R, 10S) and*** ***(4aR, 7aS, 8R, 10S)-15-[2,4a,5,6,7a,8,8a,9,10,11,16-Dodecahydro-10-(methoxycarbonyl)-1H-indolo-(2’,3’:6,7)-azonino-(1,2,3-bc)-2-pyrindin-10-yl]vindoline (16 and 17).***

**Methyl [3a*RS*, 4*RS*, 11b*SR*]-4-[1*SR*, 2*SR*]-[2-(acetoxymethyl)-cyclopentyl]-3-(benzyl)-1,2,3,3a,4,5-hexahydro-7H-pyrrolo-[2,3-d]-carbazole-6-carboxylate and its 1*RS*, 2*RS* Diastereomer (101, 102)**. The indoloazepine **60**(1.81 g, 7.41 mmol) was dissolved in 35 cm3  of dry dichloromethane and the aldehyde **96** (1.65 g, 8.97 mmol) was added. The solution was stirred overnight at 20 oC. TLC (SiO2, 10% methanol/CH2Cl2) of the mixture showed the formation of two products (*Rf* =0.51 and 0.74, CAS, blue). The reaction mixture was concentrated and immediately dissolved in 35 cm3  of CHCl3. To the solution was added benzyl bromide (2.2 cm3  , 18.5 mmol) and then the mixture was heated at reflux until TLC showed complete formation of a salt (about 4 h). The solvent was evaporated under vacuum and the residual salt was triturated with ether and filtered. The solid was then dissolved in 30 cm3  of dry methanol and 2 cm3  of triethylamine and the solution heated at reflux overnight. The methanol was evaporated and the residue was chromatographed (SiO2, 2:1 either/hexane) to give 3.1 g (84%) of a mixture of 2 isomers **101** and **102**, formed in a 1:1 ratio.

Data for less polar isomer **102**: Mp 182-184 oC; TLC (SiO2, 2:1 ether/hexane) *Rf =* 0.38 (CAS, blue); NMR (270 MHz, CDCl3) H8.93 (s, 1 H), 7.44-7.29 (m, 5 H), 7.18-7.12 (m, 2 H), 6.86-6.80 m (2 H), 4.30 (d, *J* 12, 1 H), 4.24 (m, 1 H), 3.79 (s, 3 H), 3.76 (m, 1 H), 3.65 (d, *J* 13, 1 H), 3.24 (s, 1 H), 2.85 (m, 1 H),2.66 (s, 2 H), 2.50 (m, 1 H), 2.02 (s, 3 H), 2.00-1.90 (m, 2 H), 1.88-1.21 (m, 8 H); MS *m/z* 500 (M+, 18%), 367 (12), 287 (23), 286 (100), 227 (10), 226 (10), 91 (92), 81 (21), 80 (11), 67 (15). Anal. calcd. for C31H36N2O4: C, 74.37; H, 7.25; N, 5.60. Found: C, 74.36; H, 7.48; N, 5.36.

Data for more polar isomer **101**: TLC (SiO2, 2:1 ether/hexane) *Rf* = 0.27 (CAS, blue); NMR (270 MHz, CDCl3) H8.92 (s, 1 H) 7.40 - 7.26 (m, 5 H), 7.15 (m, 1 H), 6.93 (d, 1 H), 6.82 (m, 2 H), 4.13 (m, 2 H), 3.82 (m, 1 H), 3.79 (s, 3 H), 3.68 (d, *J* 13, 1 H), 3.11, (s, 1 H), 2.88 (m, 2 H), 2.61 (m, 2 H), 2.07 (s, 3 H), 2.05 (m, 2 H), 1.88-1.15 (m, 8 H); MS *m/z* 500 (M+, 17%), 367 (11), 334 (25), 287 (20), 286 (96), 202 (13), 156 (11), 133 (16), 132 (14), 124 (15), 96 (16), 95 (38), 91 (89), 86 (23), 84 (36), 82 (18), 81 (100), 80 (42), 79 (22), 68 (41), 67 (86), 55 (39), 54 (37), 51 (24).

**Methyl [3a*RS*, 4*RS*, 11b*SR*]-4-[1*SR*, 2*SR*]-[2-(hydroxymethyl)-cyclopentyl]-3-(benzyl)-1,2,3,3a,4,5-hexahydro-7H-pyrrolo-[2,3-d]-carbazole-6-carboxylate and its 1*RS*, 2*RS* Diastereomer (104, 103)**.The mixture of acetates **101**, **102** (3.0 g, 6 mmol) was dissolved in 100 cm3  of methanol and K2CO3 (1.66 g , 12 mmol) was added. A few drops of water were added and the solution was heated at reflux for 0.5 h. TLC (SiO2, 1:1 ether/hexane) showed the formation of two products (*Rf* = 0.20 and 0.49, CAS, blue). The reaction mixture was neutralized to pH 7 with 1% HCl and the methanol was evaporated. The residue was then dissolved in dichloromethane and washed with water and brine. The organic phase was dried over Na2SO4 and the solvent evaporated. The two isomers were separated by chromatography (SiO2,1:1 ether/hexane) to give 51.5% of the less polar isomer and 46% of the more polar isomer.

Less polar 1*RS*, 2*RS* isomer **103**: TLC (SiO2, 1:1 ether/hexane) *Rf =* 0.49 (CAS, blue); NMR (250 MHz, CDCl3) H8.92 (s, 1 H), 7.43-7.26 (m, 5 H), 7.18-7.08 (m, 2 H), 6.89-6.80 (m, 2 H), 4.31, (d, *J* 13, 1 H) 3.78 (s, 3 H), 3.77 (m, 1 H), 3.63 (d, *J* 13, 1 H), 3.38 (m, 1 H), 3.22 (s, 1 H), 2.85 (d,d, *J* 9, 6, 1 H), 2.64 (d, *J* 3, 2 H), 2.51 (m, 1 H), 2.01-1.88 (m, 4 H), 1.68-1.19 (m, 8 H); NMR (67.9 MHz, CDCl3) C169.0, 165.5, 143.1 137.9, 128.6, 128.3, 127.8, 126.9, 121.9, 120.6, 109.2, 90.4, 69.9, 62.4, 58.4, 55.5, 50.8, 50.6, 43.5, 42.1, 41.6, 38.9, 28.3, 28.1, 22.6, 21.4; IR (KBr) max/cm-1 3365, 2940, 2910, 2865, 2793, 1675, 1605, 1463, 1435, 1280, 1245, 1200, 1113, 740; MS, *m/z* 459 (M+1+, 9%), 458 (M+, 29), 332 (5), 325 (6), 245 (18), 244 (100), 215 (9), 194 (5), 180 (3), 167 (7), 154 (6), 137 (12), 120 (6), 105 (6), 91 (74), 84 (33), 67 (55), 55 (30).

More polar 1*SR*, 2*SR* isomer **104**: TLC (SiO2, 1:1 ether/hexane) *Rf*= 0.20 (CAS, blue); NMR (250 MHz, CDCl3) H 8.92 (s, 1 H), 7.41-7.28 (m, 5 H), 7.15 (m, 2 H), 6.93-6.80 (m, 2 H), 4.10 (d, 1 H), 3.80 (s, 3 H), 3.80-3.68 (m, 2 H), 3.25 (t, 1 H), 3.10 (s, 1 H), 2.90 (m, 2 H), 2.6 (m, 2 H), 2.13-1.90 (m, 4 H), 1.80-1.10 (m, 8 H); NMR (67.9 MHz, CDCl3) C168.9, 165.0, 143.2, 137.8, 129.9, 129.0, 128.3, 127.8, 127.2, 122.0, 120.6, 109.2, 91.2, 69.7, 61.3, 58.1, 55.2, 50.9, 50.5, 42.7, 42.4, 41.8, 40.9, 28.4, 27.8, 22.5, 21.6; IR (KBr) max/cm-1 3365, 2940, 2910, 2860, 2780, 1675, 1605, 1465, 1435, 1280, 1245, 1200, 1123, 740; MS, *m/z* 459 (M+1+, 8%), 458 (M+, 30), 245 (14), 244 (91), 96 (16), 91 (86), 86 (14), 84 (38), 81 (88), 77 (13), 68 (60), 67 (100), 57 (20), 55 (43), 54 (44), 51 (30).

**Methyl [3a*RS*, 4*RS*, 11b*SR*]-4-[1*SR*, 2*SR*]-[2-(tosyloxymethyl)-cyclopentyl]-3-(benzyl)-1,2,3,3a,4,5-hexahydro-7H-pyrrolo-[2,3-d]-carbazole-6-carboxylate (106) and its 1*RS*, 2*RS* Diastereomer (105)**.To 30 cm3  of dichloromethane was added the respective separate alcohol corresponding to**101** or **102** (300 mg, 0.655 mmol) and triethylamine (0.14 cm3  , 0.098 mmol). The reaction mixture was cooled to 0 oC and *p*-toluenesulfonic anhydride (0.32 g, 0.98 mmol), dissolved in 10 cm3  of dichloromethane, was added dropwise to the mixture. The mixture was allowed to warm slowly to 20 oC and stirred overnight at 20 oC. The reaction mixture was then washed with 10% Na2CO3, brine, dried over Na2SO4 and the solvent evaporated. The crude product was chromatographed on silica gel with ether/hexane, 3:1, for the more polar isomer, and with 2:1 ether/hexane for the less polar isomer, to yield 0.363 g (91%) and 0.295 g (74%) respectively of the tosylate derivatives.

Less polar 1*RS*, 2*RS* isomer **105**: TLC (SiO2, 1:1 ether/hexane) *Rf*= 0.70 (CAS, blue); NMR (270 MHz, CDCl3) H 8.90 (s, 1 H), 7.75 (d, *J* 8, 2 H) 7.33-7.04 (m, 9 H), 6.89-6.78 (m, 2 H), 4.1 (m, 1 H), 3.92 (d, *J* 13, 1 H), 3.76 (s, 3 H), 3.35 (d, *J* 13, 1 H), 3.0 (s, 1 H), 2.75, (m, 1 H), 2.59 (s, 2 H), 2.45 (m, 1 H), 2.26 (s, 3 H), 2.02-1.90 (m, 2 H), 1.71-1.11 (m, 10 H); NMR (67.9 MHz, CDCl3) C168.8, 165.7, 144.6, 143.0, 139.4, 137.6, 133.4, 129.8, 128.7, 128.3, 127.9, 127.8, 127.0, 121.9, 120.7, 109.3, 90.1, 70.6, 69.8, 58.4, 55.4, 50.8, 50.5, 43.4, 41.9, 39.0, 38.7, 31.5, 28.3, 28.1, 22.5, 21.4, 21.0; IR (Kbr) max/cm-1 3380, 2960, 2870, 1680, 1610, 1465, 1365, 1250, 1235, 1200, 1188, 1175, 955, 745; MS *m/z* 612 (M+, 2%), 440 (3), 398 (15), 227 (14), 212 (49), 154 (57), 125 (9), 92 (11), 91 (100), 81 (20), 78 (57), 75 (31), 67 (14), 65 (18), 50 (15).

More polar 1*SR*, 2*SR* isomer **106**: TLC (SiO2, 1:1 ether/hexane) *Rf* = 0.69 (CAS, blue); NMR (270 MHz, CDCl3) H 8.94 (s, 1 H), 7.80 (d, *J* 8, 2 H), 7.37-7.25 (m, 11 H), 7.13 (t, *J* 7, 1 H) 6.91-6.78 (m, 2 H), 4.13-4.08 (m, 1 H), 4.03 (d, *J* 13, 1 H), 3.76 (s, 3 H), 3.73-3.69 (m, 2 H), 3.05 (s, 1 H), 2.87 (m, 1 H), 2.67-2.47 (m, 2 H), 2.44 (s, 3 H), 2.10-1.99 (m, 2 H), 1.66-1.00 (m, 10 H); NMR (67.9 MHz, CDCl3) C168.8, 164.9, 144.5, 143.0, 138.9, 137.8, 133.5, 129.8, 128.9, 128.3, 127.8, 127.1, 122.0, 120.6, 109.2, 90.7, 69.8, 69.4, 58.1, 55.2, 50.9, 50.5, 42.3, 41.6, 41.0, 39.6, 28.0, 27.9, 22.2, 21.6, 21.1; IR (KBr) max/cm-1 3380, 2955, 2870, 2790, 1680, 1610, 1465, 1435, 1360, 1280, 1248, 1185, 1175, 1125, 955, 743; MS *m/z* 612 (M+, 1%), 440 (7), 398 (39), 227 (12), 226 (22), 211 (24), 154 (32), 93 (15), 92 (12), 91 (100), 81 (14), 79 (10), 78 (98), 77 (17), 75 (15), 65 (17), 56 (12), 51 (16).

**Coupling Reaction of Vindoline with the Less Polar 1*RS*, 2*RS* Tosylate 109. Formation of Tosylates 107 and 108**. The less polar tosylate **105** (300 mg, 0.49 mmol) was dissolved in 30 cm3  of dry dichloromethane and triethylamine (0.09 cm3  , 0.65 mmol). The solution was then cooled to 0 oC and *tert-*butyl hypochlorite (0.076 cm3  , 0.65 mmol) was added dropwise. After 5 min TLC on silica gel showed a new compound, which turned brown with CAS spray. The reaction mixture was washed with water and brine, dried over Na2SO4 and the solvent evaporated to yield a white foam, which was used immediately for the next reaction.

The chloro imine product was dissolved in 15 cm3  of dry acetone and vindoline (0.205 g, 0.45 mmol) was added. The solution was cooled to 0 oC and tetrafluoroboric acid diethyl ether complex (0.129 cm3  , 0.75 mmol) was added dropwise. After 5 min, AgBF4 (0.194 g, 0.99 mmol) in 5 cm3  of acetone was syringed into the reaction mixture. The reaction was complete after 10 min. The mixture was poured into 10% K2CO3 and ice and the aqueous layer was extracted three times with dichloromethane. The combined organic phases were washed with brine, dried over Na2SO4, and the solvent evaporated. The crude imine was then dissolved in 15 cm3  of acetic acid and potassium borohydride (0.27 g, 4.98 mmol) was added in portions. The mixture was stirred for another 10 min and then poured into 10% K2CO3 and ice (pH 9-10). The aqueous phase was extracted three times with dichloromethane and the combined organic layers were washed with water, brine and dried over Na2SO4. The solvent was evaporated to give the crude product, some of which had already cyclized to the quaternary ammonium salt. TLC (ethyl acetate) showed the coupling products **107** and **108**,*Rf =* 0.45, and their cyclization products *Rf* =0.0 (CAS, brown). The compounds were chromatographed on silica gel, eluting first with ethyl acetate, followed by 9:1 CH2Cl2/methanol, to isolate the quaternary salts (48% total based on 0.9 equiv. of vindoline). The mixture of amino tosylates **107**/**108** could not be separated by chromatography on silica gel. For the mixture: TLC (SiO2, ethyl acetate) *Rf* = 0.45 (CAS, brown); NMR (270 MHz, CDCl3) H 9.85 (br s, 1 H), 8.07 (s, 1 H), 7.64 (d, *J* 8, 2 H), 7.35 (d, *J*  8, 2 H) 7.27 (d, *J*  8, 2 H), 7.16 (m, 3 H), 7.00 (m, 2 H), 6.90-6.82 (m, 4 H), 6.09 (s, 1 H), 5.83 (dd, 1 H), 5.43 (s, 1 H), 5.32 (d, *J* 10, 1 H), 3.78 (s, 6 H), 3.76 (s, 2 H), 3.61 (s, 3 H), 3.65-3.58 (m, 2 H), 3.55 (s, 2 H), 3.45-2.99 (m, 3 H), 2.72 (s, 3 H), 2.59-2.31 (m, 3 H), 2.42 (s, 3 H), 2.37-2.31 (m, 1 H), 2.10 (s, 3 H), 1.81-1.60 (m, 3 H), 1.58-1.23 (m, 10 H), 0.86 (t, *J* 7, 3 H), 0.81-0.74 (m, 2 H), 0.55-0.40 (m, 1 H).

**(4a*R*, 7a*S*, 8*R*, 10*S*) and (4a*S*, 7a*R*, 8*S*, 10*R*)-15-[2,4a,5,6,7a,8,8a,9,10,11,16-Dodecahydro-10-(methoxycarbonyl)-1H-indolo-(2’,3’:6,7)-azonino-(1,2,3-bc)-2-pyrindin-10-yl]vindoline (17 and its 4a, 7a, 8, 10-epi-Diastereomer).** The mixture of two diastereomers **107** and **108** (163 mg, 0.15 mmol) was dissolved in 7 cm3  of dry THF and heated at reflux for 2 h, when the compounds were converted to quaternary salts. The solvent was then evaporated under vacuum and the residue dissolved in 15 cm3  of dry methanol. To the solution was added 15 mg of 10% Pd/C and the mixture was stirred under hydrogen for 2 h for debenzylation. The mixture was filtered through Celite, the residue washed serveral times with dichloromethane and the combined filtrate partitioned between 10% K2CO3 and dichloromethane. The organic extracts were washed with brine, dried over Na2SO4 and concentrated, to yield two diastereomers with TLC *Rf* = 0.46 and 0.37 (SiO2, 10% methanol/CH2Cl2). The two isomers were separated by column chromatography on silica gel, eluting first with 5% methanol/CH2Cl2 then with 10% methanol/CH2Cl2 to yield 45.3 mg of the 10 *R* title products and 47.7 mg of the 10 *S* title product **17** (37% and 39% respectively).

Data for the more polar 10 *S* isomer **17**: TLC (SiO2, 10% methanol/CH2Cl2) *Rf* = 0.37 (CAS, brown); NMR (250 MHz, CDCl3) H9.80 (b s, 1 H), 8.00( s, 1 H), 7.48 (d, *J* 8, 1 H) 7.14 (m, 4 H), 6.56 (s, 1 H), 6.11 (s, 1 H), 5.86 (dd, 1 H), 5.45 (s, 1 H), 5.32 (d, *J* 10, 1 H), 3.80 (s, 6 H), 3.76 (s, 1 H), 3.62 (s, 3 H), 3.69-3.11 (m, 7 H), 2.86 (m, 3 H), 2.73 (s, 3 H), 2.69 (s, 1 H), 2.45 (m, 1 H), 2.30 (m, 2 H), 2.12 (s, 3 H), 1.82-1.41 (m, 5 H), 1.38-1.18 (m, 5 H), 0.84 (t, *J* 7 H, 3 H), 0.87-0.79 (m, 2 H); NMR (67.9 MHz, CDCl3) C174.7, 171.7, 170.7, 158.3, 152.9, 135.2, 131.3, 130.2, 129.4, 124.4, 123.9, 123.3, 122.3, 121.5, 118.9, 118.4, 110.4, 94.3, 83.5, 79.8, 76.5, 66.3, 55.9, 55.8, 53.3, 52.2, 51.9, 50.8, 50.5, 44.4, 44.1, 42.9, 38.2, 37.3, 37.2, 35.6, 33.9, 30.9, 29.8, 29.2, 23.0, 20.9, 8.3; MS *m/z* 807 (6%), 806 (M+, 13), 776 (11), 775 (34), 747 (24), 676 (17), 647 (12), 646 (13), 567 (8), 539 (9), 508 (8), 469 (8), 380 (8), 350 (21), 325 (10), 311 (9), 295 (9), 291 (9), 282 (29), 273 (11), 272 (11), 207 (10), 150 (100), 136 (49), 135 (27), 122 (39), 121 (17), 108 (13), 93 (18), 82 (21); UV (ethanol) max/nm 312, 305, 260, 214, 195, 192, 191.

Data for less polar 10 *R* isomer: TLC (SiO2, 10% methanol CH2Cl2) *Rf* = 0.46 (CAS, brown); NMR (250 MHz, CDCl3)  9.60 (bs, 1 H), 7.65-7.55 (m, 3 H), 7.36-7.18 (m, 3 H), 6.92 (s, 1 H), 6.01 (s, 1 H), 5.85 (dd, *J* 4, 10, 1 H) 5.49 (s, 1 H), 5.20 (d, *J* 10, 1 H) 3.90 (s, 1 H), 3.81 (s, 3 H), 3.68 (s, 3 H), 3.56 (s, 3 H), 3.79-3.44 (m, 3 H), 3.16 (m, 1 H), 2.72 (s, 3 H), 2.91-2.53 (m, 5 H), 2.54 (s, 1 H), 2.50-2.04 (m, 5 H), 2.09 (s, 3 H), 1.94-1.02 (m, 10 H), 0.86 (m, 1 H), 0.38 (t, *J* 7, 3 H); MS *m/z* 806 (M+, 8%), 804 (27), 746 (13), 658 (9), 645 (100), 616 (9), 538 (17), 537 (75), 536 (60), 524 (15), 523 (28), 510 (11), 478 (31), 322 (14), 294 (11), 282 (53), 277 (23), 272 (10), 269 (16), 267 (11), 238 (15), 222 (21), 188 (12), 149 (14), 136 (39), 135 (32), 122 (33), 121 (32), 107 (19), 97 (22), 93 (18), 83 (23), 69 (29), 55 (30); UV (ethanol) max/nm 312, 306, 305, 262, 219, 195, 193.

**Coupling Reaction of Vindoline with the More Polar 1*SR,* 2*SR* Tosylate 106. Formation of Tosylates 109 and 110**. The more polar racemic tosylate **106** (200 mg, 0.327 mmol) corresponding to acetate **102** was coupled to vindoline by the same procedure used for the less polar racemic tosylate corresponding to acetate **101**. TLC of the reaction mixture in ethyl acetate showed the coupling products *Rf* = 0.54 and their cyclization products, the quaternary ammonium salts, *Rf* = 0.0 (CAS, brown). Chromatographing with ethyl acetate on silica gel, followed by 10% methanol/CH2Cl2 yielded 0.1082 g (0.1013 mmol) of the quaternary ammonium salts and 0.100 g (0.0943 mmol) of a mixture of two diastereomers **109** and **110** (67% combined yield).

**(4a*S*, 7a*R*, 8*R*, 10*S*) and (4a*R*, 7a*S*, 8*S*, 10*R*)-15-[2,4a,5,6,7a,8,8a,9,10,11,16-Dodecahydro-10-(methoxycarbonyl)-1H-indolo-(2’,3’:6,7)-azonino-(1,2,3-bc)-2-pyrindin-10-yl]vindoline (16 and its 4a,7a,8,10-epi-Diastereomer 111).** The two diastereomers **109** and **110** (0.13 g, 0.12 mmol) were dissolved in 15 cm3  of dry THF and heated at reflux for about 2 h, when the quaternary salts were formed. The solvent was removed by rotary evaporator and the salts were dissolved in 15 cm3  of dry methanol. After addition of 10 mg of 10% Pd/C to the solution the mixture was stirred under hydrogen for 2 h. The mixture was filtered through Celite and then worked up in the same manner as described above for the 4a',7a epimers to yield two diastereomers **111** and **16** with TLC *Rf* = 0.29 and 0.10 (SiO2 ether, acetone, triethylamine 100:30:3). The two diastereomers were separated by column chromatography on silica gel, eluting with ether/acetone/triethylamine 100:30:3 to yield 0.0352 g of the 10 *R* isomer **111** (36%) and 0.0335 g of the 10 *S* isomer **16** (35%) of the title products.

Data for the more polar 10 *S* isomer **16**: TLC SiO2, ether/acetone/triethylamine 100:30:3) *Rf* = 0.10 (CAS, brown); NMR (250 MHz, CDCl3) H9.80 (b s, 1 H), 7.98 (s, 1 H), 7.51 (d, *J* 8, 1 H), 7.16 (m, 4 H), 6.57 (s, 1 H), 6.11 (s, 1 H), 5.88 (dd, 1 H), 5.47 (s, 1 H), 5.32 (d, *J* 12, 1 H), 3.81 (s, 3 H) 3.80 (s, 3 H), 3.78 (s, 1 H), 3.61 (s, 3 H), 3.72-3.26 (m, 5 H), 2.74 (s, 3 H), 3.08-2.60 (m, 4 H), 2.67 (s, 1 H), 2.52-2.46 (m, 2 H), 2.12 (s, 3 H), 2.20-1.97 (m, 3 H), 1.81-1.72 (m, 2 H), 1.50-1.14 (m, 6 H), 0.86-0.81 (m, 2 H), 0.82 (t, 3 H); 67.9 MHz 13C NMR (CDCl3) 174.1, 171.7, 170.8, 158.2, 153.3, 135.1, 131.2, 130.0, 128.9, 124.6, 123.7, 123.6, 122.9, 120.1, 119.7, 118.0, 115.0, 110.6, 94.2, 83.4, 79.7, 76.5, 66.5 (2), 55.9, 54.0, 53.3, 52.4, 52.1, 50.8, 50.6, 46.7, 44.6, 42.9, 40.3, 37.9, 35.0, 32.9, 31.2 (2), 30.9, 29.7, 28.6, 25.7, 21.0, 19.5, 8.5; UV (ethanol) max 311, 305, 288, 261, 214, 195, 194, 192 nm; IR (KBr) max 3470, 2950, 2870, 1742, 1615, 1502, 1460, 1432, 1370, 1334, 1297, 1245, 1225, 1038, 1005, 735 cm-1.

Data for less polar isomer **111**: TLC (SiO2, ether/acetone/triethylamine 100:30:3) *Rf* = 0.29 (CAS, brown); 250 MHz 1H NMR (CDCl3) 9.75 (b, s, 1 H), 8.10 (s, 1 H), 7.50 (d, 1 H, *J* = 8 Hz), 7.23 (m, 4 H), 6.70 (s, 1 H), 6.16 (s, 1 H), 5.82 (dd, 1 H), 5.47 (s, 1 H), 5.23 (d, 1 H *J* = 10 Hz) 3.82 (s, 3 H), 3.81 (s, 3 H), 3.67 (s, 3 H), 3.79-3.50 (m, 4 H), 3.43-3.32 (m, 3 H), 3.19-2.83 (m, 3 H), 2.74 (s, 3 H), 2.68-1.89 (m, 5 H), 2.46 (s, 1 H), 2.07 (s, 3 H), 1.72-1.03 (m, 11 H), 0.87 (m, 1 H), 0.37 (t, *J* 7, 3 H); MS *m/z* 807 (8%), 806 (M+, 22), 775 (4), 747 (7), 645 (10), 537 (10), 469 (39), 380 (14), 356 (12), 350 (21), 343 (15), 323 (11), 322 (13), 321 (14), 314 (12), 294 (16), 293 (64), 282 (28), 279 (21), 273 (11), 266 (12), 265 (21), 264 (16), 256 (10), 240 (11), 167 (19), 150 (56), 149 9100), 136 (18), 135 (12), 122 (10), 57 (13), 55 (14); UV (ethanol) max/nm 297, 290, 256, 213, 193, 193, 192; IR (KBr) max/cm-1 3460, 2950, 2870, 1743, 1615, 1502, 1460, 1432, 1370, 1333, 1295, 1245, 1225, 1040, 1002, 734.

***For Scheme 7: Methyl (4aS, 8aR, 9R, 11S) and (4aR, 8aS, 9R, 11S) -15-[1,2,4,4a,5,6,7,8,8a,9,10,11,12,17-Tetradecahydro-11-(methoxycarbonyl)-indolo-(2’,3’:6,7)azonino(1,2,3-bc)isoquinolin-11-yl]vindoline (14) and (15).***

**Racemic Methyl 11 and -cis-[[2-(Acetoxymethyl)cyclohexyl]methyl]-1,2,4,6-tetrahydro-3,10b-methanoazepino[4,5-b]indole-5-carboxylate.** At 20 oC, 382 mg (1.93 mmol) of rac-cis-[(2-acetoxymethyl)cyclohexy] ethanal (**117**) was added to a solution of 313 mg (1.30 mmol) of methyl 1,2,3,4,5,6-hexahydroazepino (4,5-b) indole-5-carboxylate (**60**) in 10 cm3  of dichloromethane. After 16 h the mixture was concentrated under vacuum to provide 516 mg (95%) of the racemic title products. TLC *Rf* = 0.72, 0.56 (SiO2, 9:1 dichloromethane: methanol, CAS blue).

**Racemic Methyl [3a*RS*, 4*RS*, 11b*SR*]-4-[1*RS*, 2*RS*]-[2-(Acetoxymethyl)cyclohexyl]-3-(benzyl)-1,2,3,3a,4,5-hexahydro-7H-pyrrolo[2,3-d]carbazole-6-carboxylate (119) and Racemic Methyl [3a*RS*, 4*RS*, 11b*SR*]-4-[1*SR*, 2*SR*]-[2-(Acetoxymethyl)cyclohexyl]-3-(benzyl)-1,2,3,3a,4,5-hexahydro-7H-pyrrolo[2,3-d]carbazole-6-carboxylate (118).** To a solution of the epimeric bridged azepines (544 mg, 1.28 mmol) of racemic methyl 11and -cis-[[2-(acetoxymethyl)cyclohexyl]methyl]-1,2,4,6-tetrahydro-3,10b-methanoazepino [4,5-b] indole-5-carboxylates in 15 cm3  of dichloromethane was added 350 µL (2.71 mmol) of benzyl bromide. The solution was heated at reflux for 3 h and then concentrated under vacuum. Trituration with ether and filtration provided 763 mg (95%) of the quaternary salt racemic 11 and -cis-[[2-(acetoxymethyl)cyclohexyl]methyl]-3-(benzyl)-5-(methoxycarbonyl)-1,2,4,6-tetrahydro-3, 10b-methanoazepino[4,5-b]indolium bromide with TLC *Rf* = 0.25 (SiO2, 9:1 dichloromethane-methanol, CAS blue green, yellow center). This product was heated at reflux for 4 h in 30 cm3  of dry methanol containing 2 cm3  of triethylamine. After concentration under vacuum, the residue was chromatographed on a 50 g silica gel column, eluting with 1:1 dichloromethane: diethyl ether, to provide 600 mg (90%) of the two diastereomeric title products in a 1:1 ratio. Rechromatography under the same conditions provided the 4*RS*-[1*RS*, 2*RS*]-(4,1 PARF) title isomer (**119**); TLC *Rf =* 0.27 (SiO2, 1:1 ether: heptane, CAS blue, yellow center and the 4RS-[1SR, 2SR]-(4,1 PREF) title isomer (**118**); TLC *Rf* = 0.13 (SiO2, 1:1 ether:heptane, CAS blue, yellow center. For the 4,1 PARF isomer **119**: NMR (270 MHz, CDCl3) H 8.88 (s, 1 H), 7.30 (m, 7 H), 6.85 (t, *J* 8, 1 H), 6.83 (d, *J* 8, 1 H), 4.30 (d, *J* 13, 1 H), 4.20 (m, 2 H), 3.78

(s, 3 H), 3.63 (d, *J* 13, 1 H), 3.30 (s, 1 H), 2.90 (dd, *J* 6, 9, 1 H), 2.75

(d, *J* 15, 1 H), 2.60 (dd, *J* 15, 3 , 1 H), 2.55 (m, 1 H), 1.97 (s, 3 H), 1.90-1.00,

(m, 14 H); EI MS *m/z* 515 (61%), 514 (M+, 59), 300 (82), 291 (29), 273 (23), 258 (16), 257 (19), 215 (18), 139 (68), 121 (33), 105 (29), 91 (100). A sample recrystallized from methanol had mp 147-148 oC. Anal. calcd for C32H38N2O4: C, 74.68; H, 7.44, N, 5.44. Found: C, 74.68; H, 7.64; N, 5.48.

For the 4,1 PREF isomer **118**: NMR (270 MHz, CDCl3) H 8.90 (s, 1 H), 7.35 (m, 5 H), 7.18 (t, *J* 8, 1 H), 7.06 (d, *J* 7, 1 H), 6.89 (t, *J* 7, 1 H), 6.82 (d, *J* 7, 1 H), 4.20 (m, 3 H), 3.78 (s, 3 H), 3.60 (d, *J* 13, 1 H), 3.15 (s, 1 H), 2.89 (m, 2 H), 2.53 (m, 2 H), 2.09 (s, 3 H), 1.90-1.00 (m, 13 H); EI MS *m/z* 514 (M+, 22%), 301 (14), 300 (72), 91 (100).

**Racemic Methyl [3a*RS*, 4*RS*, 11b*SR*]-3-(Benzyl)-4-[1*RS*, 2*RS*]-[2-(hydroxymethyl)cyclohexyl]-1,2,3,3a,4,5-hexahydro-7H-pyrrolo[2,3-d]carbazole-6-carboxylate (121) and Racemic Methyl [3a*RS*, 4*RS*, 11b*SR*]-3-(Benzyl)-4-[1*SR*, 2*SR*]-[2-(hydroxymethyl)cyclohexyl]-1,2,3,3a,4,5-hexahydro-7H-pyrrolo[2,3-d]carbazole-6-carboxylate (120).** To a solution of 48 mg (2.11 mmol) of sodium in 10 cm3  of methanol was added 361 mg (0.702 mmol) of a 1:1 mixture of 4,1 PARF and 4,1 PREF diastereomeric, racemic methyl [3a*RS*, 4*RS*, 11b*SR*]-4-[1*RS*, 2*RS*]-[2-(acetoxymethyl)cyclohexy]-3-(benzyl)-1,2,3,3a,4,5-hexahydro-7H-pyrrolo[2,3-d]carbazole-6-carboxylate (**119**) and racemic methyl [3a*RS*, 4*RS*, 11b*SR*]-4-[1*SR*, 2*SR*]-[2-(acetoxymethyl)cyclohexyl]-3-(benzyl)-1,2,3,3a,4,5-hexahydro-7H-pyrrolo[2,3-d]carbazole-6-carboxylate (**118**)**.** After stirring at 20 oC for 3 h, 10 cm3  of water was added, followed by 10% ammonium chloride and enough 5% HCl to achieve pH 7. Extraction with 3 x 20 cm3  of dichloromethane, concentration of the extracts under vacuum and chromatography on 20 g of silica gel, eluting with 3:1 dichloromethane: ether gave 156 mg of the 4*RS*-[1*RS*, 2*RS*], (4,1 PARF) title alcohol; TLC *Rf* = 0.41 (SiO2, 1:1 ether: pentane, CAS blue); and 135 mg of the 4 *RS* [1*SR*, 2*SR*], (4,1 PREF) title alcohol; TLC *Rf* = 0.28 (SiO2, 3:1 dichloromethane: ether, CAS blue); (total products 291 mg, 88%). For the 4,1 PARF alcohol: Mp 66-67 oC; UV (EtOH) max/nm 202, 224, 294, 328; IR (KBr) max/cm-1 3366, 2925, 2849, 2784, 1664, 1599, 1455, 1429, 1285, 1239, 1193, 1128, 1108, 1036, 728, 689; NMR (270 MHz, CDCl3) H 8.90 (s, 1 H), 7.30 (m, 5 H), 7.10 (t, *J* 6, 1 H), 7.08 (d, *J* 6, 1 H), 6.82(t, *J* 6, 1 H), 6.79 (d, *J* 6, 1 H), 4.25 (d, *J* 13, 1 H), 3.75 (s, 3 H), 3.70 (m, 2 H), 3.57 (d, *J* 13, 1 H), 3.25 (s, 1 H), 2.85 (dd, 1 H), 1.80-0.90 (m, 13 H); EI MS *m/z* (relative intensity) 472 (M+, 13), 259 (11), 258 (61), 91 (100).

For the 4,1 PREF alcohol: Mp 92-93 oC; UV (EtOH) max/nm202, 228, 300, 328; IR (KBr) max/cm-13432, 3380, 2935, 2850, 2791, 1658, 1599, 1462, 1429, 1370, 1337, 1272, 1253, 1193, 1128, 1108, 1030, 945, 912, 729, 690; NMR (270 MHz, CDCl3) H 8.82 (s, 1 H), 7.35 (m, 5 H), 7.18 (t, *J* 8, 1 H), 7.08 (d, *J* 8, 1 H), 6.85 (t, d, 2 H), 4.10 (d, *J* 12, 1 H), 3.80 (s, 3 H), 3.70 (m, 3 H), 3.15 (s, 1 H), 2.90 (m, 2 H), 2.60 (m, 2 H), 2.05 (ddd, 1 H), 1.80-0.80 (m, 13 H); EI MS *m/z* 472 (M+, 31%), 258 (66), 91 (100).

**Racemic Methyl [3a*RS*, 4*RS*, 11b*SR*]-3-(Benzyl)-4-[1*RS*, 2*RS*]-**

**[2-(*p*-toluensulfonyloxymethyl)cyclohexyl-1,2,3,3a,4,5-hexahydro-7H-pyrrolo[2,3-d]carbazole-6-carboxylate (123).** To 138 mg (0.29 mmol) of the 4,1 PARF alcohol methyl [3a*RS*, 4*RS*, 11b*SR*]-3-(benzyl)-4-[1*RS*, 2*RS*]-[2-(hydroxymethyl)cyclohexyl]-1,2,3,3a,4,5-hexahydro-7H-pyrrolo[2,3-d]carbazole-6-carboxylate (**121**) in 20 cm3  of dichloromethane was added 90 µL (0.6 mmol) of triethylamine, followed by 150 mg (0.45 mmol) of *p-* toluenesulfonic anhydride, added over 2 h. After 3 h at 20 oC further 90 µL of triethylamine and 150 mg *p-* toluenesulfonic anhydride were added and the mixture was stirred for 48 h. Concentration under vacuum and chromatography on 20 g of silica gel, eluting with 1% methanol in dichloromethane, gave 152 mg (82%) of the 4,1 PARF title tosylate, mp 60-62 oC. TLC *Rf* = 0.55 (SiO2, 1% MeOH in CH2Cl2); UV max/nm 204, 224, 300, 328; IR (KBr) max/cm-1 3373, 2928, 2856, 2797, 1671, 1606, 1455, 1357, 1187, 1167, 1108, 938, 814, 735 cm-1; NMR (270 MHz, CDCl3) H 8.85 (s, 1 H), 7.70 (d, *J* 8, 2 H), 7.30-7.10 (m, 11 H), 6.90 (t, *J* 8, 1 H), 6.80 (d, *J* 8, 1 H), 4.10 (m, 3 H), 3.95 (d, *J* 13, 1 H), 3.78 (s, 3 H), 3.40 (d, *J* 13, 1 H), 3.18 (s, 1 H), 2.80 (m, 1 H), 2.55 (m, 3 H), 2.27 (s, 3 H), 2.00 (m, 2 H), 1.70-0.90 (m, 10 H); MS *m/z* 454 (M+-OTs, 0.1%), 412 (1), 227 (5), 212 (18), 155 (35), 138 (11), 107 (16), 91 (100).

**Racemic Methyl [3a*RS*, 4*RS*, 11b*SR*]-3-(Benzyl)-4-[1*SR*, 2*SR*]-[2-(*p-*toluenesulfonyloxymethyl)cyclohexyl-1,2,3,3a,4,5-hexahydro-7H-pyrrolo[2,3-d]carbozole-6-carboxylate (122).** To the 4,1 PREF alcohol methyl [3a*RS*, 4*RS*, 11b*SR*]-3-benzyl-4-[1*SR*, 2*SR*]-[2-(hydroxymethyl)cyclohexyl-1,2,3,3a,4,5-hexahydro-7H-

pyrrolo[2,3-d]carbazole-6-carboxylate (**120**, 237 mg, 0.578 mmol) in 30 cm3  of dry dichloromethane was added successively 130 µL (0.92 mmol) of triethylamine, 7 mg of 4-dimethylaminopyridine and 283 mg (0.867 mmol) of *p-*toluenesulfonic anhydride over 2 h. After 5 h at 20 oC further 200 µL (1.4 mmol) of triethylamine and 283 mg (0.867 mmol) of *p-* toluenesulfonic anhydride were added over 30 min. The mixture was stirred for 17 h and then an excess of 10% sodium carbonate was added. After stirring for 5 min, the phases were separated and the aqueous portion extracted with 3  20 cm3  of dichloromethane. The dried (MgSO4) and concentrated gummy extracts were leached with 20 cm3  of ethyl ether and the resulting solution concentrated to 313 mg (86%) of the title product , mp 67-69 oC. TLC *Rf* = 0.36 (SiO2, 1% methanol in dichloromethane); UV (EtOH) max/nm 204, 224, 298, 328; IR (KBr) max/cm-1 3367, 2922, 2850, 2791, 1677, 1612, 1455, 1396, 1383, 1357, 1233, 1206, 1193, 1170, 1115, 951, 810, 748; NMR (250 MHz, CDCl3)  8.95 (s, 1 H), 7.85 (d, *J* 8, 2 H), 7.35 (m, 7 H), 7.15 (t, *J* 8, 1 H), 7.05 (d, *J* 8, 1 H), 6.85 (t, *J* 8, 1 H), 6.83 (d, *J* 8, 1 H), 4.07 (m, 3 H), 3.78 (s, 3 H), 3.62 (d, *J* 13, 1 H) 3.10 (s, 1 H), 2.90 (dd, *J* 4, 8, 1 H), 2.57 (d, *J* 16, 1 H, m 1 H), 2.46 (s, 3 H), 2.40 (dd, *J* 4, 16, 1 H), 2.00 (m, 2 H), 1.70-0.80, (m, 11 H); EI MS *m/z* 626 (M+, 2% ), 455 (27), 454 (13), 139 (66), 138 (30), 137 (19), 107 (16), 91 (100).

**Methyl (4a*R*, 8a*S*, 9*R*, 11*S*)-15-[1,2,4,4a,5,6,7,8,8a,9,10,11,12,17-Tetradecahydro-11-(methoxycarbonyl)-indolo-(2’,3’:6,7)azonino(1,2,3-bc)isoquinolin-11-yl] vindoline (15) and its 4a*S*, 8a*R*, 9*S*, 11*R*, Diastereomer.** To a cooled solution of 80 mg (0.13 mmol) of racemic methyl [3a*RS*, 4*RS*, 11b*SR*]-3-(benzyl)-4-[1*RS*, 2*RS*]-[2-(*p-* toluenesulfonyloxymethyl)cyclohexyl-1,2,3,3a,4,5-hexahydro-7H-pyrrolo[2,3-d]carbazole-6-carboxylate (**123**) in 10 cm3  of dichloromethane, at 0  oC, was added 27 µL (0.19 mmol) of dry triethylamine, followed by dropwise addition of 23 µL (0.19 mmol) of *tert-*butyl hypochlorite. After stirring for 5 min at 0 oC TLC indicated complete reaction of the starting material; TLC *Rf* = 0.26 (SiO2, 1:1 ethyl ether-pentanes, CAS rust-yellow). The mixture was partitioned between 10 cm3  of water and 3  10 cm3  of dichloromethane and the dried (MgSO4) organic extracts were concentrated under vacuum at 30 oC. The residual product was dissolved in 15 cm3  of dry acetone and cooled at 0 oC. After addition of 58 mg (0.11 mmol) of vindoline hydrochloride and stirring at 0 oC for 5 min, 75 mg (0.54 mmol) of solid silver tetrafluororborate was added in one portion. After stirring in the dark at 0 oC for 30 min, 20 cm3  of 10% ammonium hydroxide in saturated brine was added. The aqueous layer was extracted with 3  15 cm3  of dichloromethane and the combined, dried (MgSO4) organic extracts were concentrated under vacuum. The residue was dissolved in 10 cm3  of acetic acid and 70 mg (1.3 mmol) of potassium borohydride was added at 20 oC over 30 min. After 5 min of further stirring the reaction mixture was poured into dichloromethane, ice and excess ammonium hydroxide and, after separation of the strongly basic aqueous solution, it was extracted with 3  20 cm3  of dichloromethane. The combined organic solutions were dried (MgSO4) and concentrated under vacuum to provide 80 mg of a mixture of indole-indolines (**126, 127**) contaminated by some vindoline. TLC *Rf* = 0.33 (indole-indolines) 0.19 (vindoline), (SiO2, ethyl acetate). The crude reaction product was dissolved in 50 cm3  of dry toluene and heated at reflux for 3 h. The solvent was evaporated under vacuum and the residue triturated with ether and collected by filtration. The white solid was dissolved in 10 cm3  of dry methanol, 14 mg of 10% palladium on carbon was added, and the mixture then stirred under an atmosphere of hydrogen for 4 h. Filtration through Celite 545, with dichloromethane rinses, and concentration gave a gummy product, which was dissolved in 30 cm3  of dichloromethane and stirred for 3 min with 10% aqueous sodium carbonate. Separation of the layers, extraction of the aqueous portion with 3  10 cm3  of dichloromethane and concentration of the dried (MgSO4) organic solutions gave a product, which was chromatographed on a 3 g silica gel column, eluting with ethyl acetate-ethanol 4:1. The initial fractions contained about 20 mg of the title (4a*S*, 8a*R*, 9*S*, 11*R*,) compound, TLC *Rf* = 0.37 (4:1 ethyl acetate-ethanol, CAS rust), NMR  0.39, contaminated by some vindoline, TLC *Rf* = 0.48 (4:1 ethyl acetate-ethanol, CAS pink), and were followed by 21 mg (40%) of the title (4a*R*, 8a*S*, 9*R*, 11*S*) compound **15**, TLC *Rf* = 0.17 (4:1 ethyl acetate-ethanol, CAS rust). Better separation was obtained using CH2Cl2 : EtOAc : MeOH (5 : 4 : 1).

For **15**: UV (EtOH) max/nm 214, 262, 288; IR (KBr) max/cm-13456, 2932, 2881, 2836, 1730, 1615, 1493, 1448, 1423, 1359, 1218, 1033, 898, 720; NMR (250 MHz, CDCl3) H 9.80 (s, 1 H) 7.95 (s, 1 H), 7.35 (d, *J* 7, 1 H), 7.00 (m, 3 H), 6.35 (s, 1 H), 6.00 (s, 1 H), 5.80 (dd, *J* 3, 8, 1 H), 5.39 (s, 1 H), 5.25 (d, *J* 8, 1 H), 3.80 (2s, 6 H), 3.75 (s, 1 H), 3.65 (s, 3 H), 3.60-3.30 (m, 12 H), 2.90-2.75 (m, 2 H), 2.75 (s, 3 H), 2.65 (s, 1 H), 2.55 (m, 3 H), 2.15 (s, 3 H), 1.80-1.20 (m, 14 H), 0.82 (t, *J* 6, 3 H); NMR (67.9 Mhz, CDCl3) C174.6, 171.6, 170.6, 158.1, 152.8, 139.5, 135.0, 130.7, 130.0, 128.9, 128.5, 125.8, 124.3, 123.3, 122.6, 120.1, 119.2, 118.1, 116.0, 110.3, 94.0, 83.2, 79.6, 76.4, 66.0, 57.0, 55.7, 55.4, 53.1, 52.2, 51.8, 50.5, 50.3, 44.3, 42.7, 40.9, 38.0, 35.7, 35.2, 30.7, 29.5, 29.4, 26.6, 26.3, 21.0, 20.8, 8.1; MS *m/z* 820 (M+, 0.5%), 789 (0.8), 761 (0.6), 661 (0.6), 540 (0.1), 469 (0.5), 282 (3), 182 (2), 164 (44), 150 (30), 135 (24), 122 (16), 111 (18), 109 (14).

For the **4a*S*, 8a*R*, 9*S*, 11*R* Diastereomer of 15**: UV (EtOH) max/nm 214, 256, 294; IR (KBr) max/cm-13450, 2923, 2876, 2846, 1734, 1609, 1497, 1450, 1426, 1360, 1219, 1030, 899, 734; NMR (270 MHz, CDCl3) Hsd*J*8, 1 H), 7.12 (m, 3 H), 6.67 (s, 1 H), 6.14 (s, 1 H), 5.77 (dd, *J* 4, 10, 1 H), 5.48 (s, 1 H), 5.22 (d, *J* 10, 1 H), 3.80 (s, 3 H), 3.79 (s, 3 H), 3.77 (s, 1 H), 3.73-3.24 (m, 12 H), 3.57 (s, 3 H), 2.86-2.53 (m, 2 H), 2.72 (s, 3 H), 2.40 (s, 1 H), 2.37-2.10 (m, 3 H), 2.05 (s, 3 H), 1.65-0.83 (m, 14 H), 0.42 (t, *J* 7, 3 H); NMR (67.9 MHz, CDCl3) C174.9, 171.9, 170.4, 158.4, 153.3, 135.1, 130.4, 130.0, 129.0, 124.2, 123.8, 123.7, 122.4, 121.2, 119.0, 118.4, 110.1, 94.2, 83.6, 79.5, 75.9, 67.6, 67.5, 56.6, 55.8, 55.7, 53.3, 52.6, 52.1, 52.0, 51.3, 50.6, 44.5, 43.3, 43.1, 42.0, 38.2, 36.0, 35.2, 31.1, 30.2, 29.6, 28.6, 26.7, 26.2, 21.2, 20.9, 8.6; MS *m/z* 820 (M+, 0.04%), 661 (0.1), 659 (0.1), 469 (0.2), 364 (0.2), 322 (0.6), 205 (1), 182 (1), 168 (1), 164 (1), 150 (1), 135 (2), 125 (3), 111 (4), 109 (3).

**Methyl (4a*S*, 8a*R*, 9*R*, 11*S*)-15-[1,2,4,4a,5,6,7,8,8a,9,10,11,12,17-Tetradecahydro-11-(methoxycarbonyl)-indolo-(2’,3’:6,7)azonino(1,2,3-bc)isoquinolin-11-yl] vindoline (14) and its 4a*R*, 8a*S*, 9*S*, 11*R* Diastereomer.** Using the reaction conditions in the preceding example, 313 mg (0.50 mmol) of racemic methyl [3a*RS*, 4*RS*, 11b*SR*]-3-(benzyl)-4-[1*SR*, 2*SR*]-[2-(*p-* toluenesulfonyloxymethyl)cyclohexyl-1,2,3,3a,4,5-hexahydro-7H-pyrrolo[2,3-d]carbazole-6-carboxylate (**122**) in 20 cm3  of dichloromethane was treated with 90 µL (0.75 mmol) of *tert-* butylhypochlorite and 105 µL (0.75 mmol) of triethylamine at 0  oC for 10 min. The resultant chloroinolenine product, TLC *Rf* = 0.77, 0.64 (ethyl acetate-dichloromethane 1:1, CAS brown), in 30 cm3  of dry acetone, was allowed to react with 256 mg (0.50 mmol) of vindoline hydrochloride and 293 mg (1.5 mmol) of silver tetrafluoroborate. The resultant crude product was stirred in 25 cm3  of acetic acid with 275 mg (5.0 mmol) of potassium borohydride. Chromatography on 20 g of silica gel, eluting with ethyl acetate, gave 301 mg (55%) of a mixture of indole-indolines **124, 125**; TLC *Rf* = 0.39 (SiO2, ethyl acetate, CAS grey-brown). This mixture was heated in 50 cm3  of dry toluene at reflux for 22 h. Filtration of the product from ether provided 250 mg of material, which was subjected to hydrogenation for 4 h in 20 cm3  of methanol with 50 mg of 10% Pd/C. Chromatography of the products on a 6 g silica gel column, eluting first with 4:1 ethyl acetate: ethanol, then with 7:3 ethyl acetate: ethanol containing 0.5% triethylamine, gave 51 mg (23% overall) of the [4a*R*, 8a*S*, 9*S,* 11*R*] title compound, TLC *Rf* = 0.42, (4:1 ethyl acetate-ethanol, CAS rust brown), and 60 mg (27% overall) of the (4a*S*, 8a*R*, 9*R*,, 11*S*) title compound **14**, TLC *Rf* = 0.13 (4:1 ethyl acetate-ethanol, CAS black-brown). Further elution with methanol provided the atropisomers **51** and **59**, which on heating in toluene at reflux gave **14** and its diastereomer, respectively.

For **14** (4a*S*, 8a*R*, 9*R*, 11*S*): UV (EtOH) max/nm 214, 258, 290; IR (KBr) max/cm-13456, 2926, 2843, 1743, 1609, 1500, 1455, 1415, 1372, 1238, 1219, 1040, 912, 726; NMR (270 MHz, CDCl3) H 9.90 (s, 1 H), 8.04 (s, 1 H), 7.50 (d, *J* 8, 1 H), 7.20 (m, 3 H), 6.50 (s, 1 H), 6.09 (s, 1 H), 5.90 (dd, *J* 9, 4, 1 H), 5.40 (s, 1 H), 5.30 (d, *J* 9, 1 H), 3.81 (s, 3 H), 3.80 (s, 3 H), 3.76 (s, 1 H), 3.62 (s, 3 H), 3.60-2.80 (m, 10 H), 2.73 (s, 3 H), 2.66 (m, 2 H), 2.50 (m, 1 H), 2.33 (s, 1 H), 2.11 (s, 3 H, m, 1 H), 1.80-1.30 (m, 15 H), 0.81 (t, *J* 7, 3 H); NMR (67.9 MHz, CDCl3) C174.6, 171.6, 170.5, 158.3, 152.7, 134.8, 131.8, 130.0, 129.4, 124.2, 123.6, 123.2, 122.1, 121.3, 118.8, 116.4, 110.1, 90.0, 83.4, 79.6, 76.4, 66.5, 56.2, 56.0, 55.6, 54.3, 53.1, 52.0, 51.8, 50.8, 50.5, 49.0, 44.3, 42.9, 38.0, 37.1, 36.3, 35.9, 32.6, 30.8, 29.6, 29.5, 27.2, 25.7, 23.7, 20.8, 8.2; MS *m/z* 820 (M+, 0.3%), 789 (1), 761 (0.1), 469 (0.3), 282 (1), 183 (2), 168 (2), 164 (40), 150 (12), 135 (13), 122 (13), 11 (12), 107 (11).

For the **4a*R*, 8a*S*, 9*S*, 11*R* diastereomer of 14**: UV (EtOH) max/nm 214, 256, 294; IR (KBr) max/cm-13450, 2928, 2880, 2850, 2797, 1733, 1609, 1490, 1448, 1418, 1364, 1246, 1216, 1038, 681; NMR (270 MHz, CDCl3) H9.75 (s, 1 H), 8.10 (s, 1 H), 7.52 (d, *J* 8, 1 H), 7.15 (m, 3 H), 6.70 (s, 1 H), 6.15 (s, 1 H), 5.80 (dd, *J* 3, 8, 1 H), 5.48 (s, 1 H), 5.20 (d, *J* 8, 1 H), 3.80 (3 s, 7 H), 3.55 (s, 3 H), 3.35-3.05 (m, 8 H), 2.75 (d, *J* 15, 1 H), 2.70 (s, 3 H), 2.69-2.50 (m, 5 H), 2.18 (s, 1 H), 2.05 (s, 3 H), 1.60-1.10 (m, 15 H), 0.38 (t, *J* 8, 3 H); NMR (67.9 MHz, CDCl3) C174.2, 171.8, 170.4, 158.2, 153.3, 134.9, 131.7, 129.8, 128.8, 128.5, 125.9, 124.2, 123.8, 123.5, 122.5, 120.3, 119.3, 118.1, 115.1, 110.1, 94.4, 83.6, 79.4, 76.0, 67.2, 56.0, 55.6, 53.8, 53.3, 52.1, 51.9, 51.2, 50.5, 48.8, 44.6, 42.9, 38.2, 35.6, 34.2, 32.7, 30.9, 29.5, 28.1, 25.6, 22.9, 22.4, 20.8, 8.2; MS *m/z*  820 (M+, 0.7%), 789 (0.1), 761 (0.3), 661 (0.2), 540 (0.2), 469 (1), 282 (2), 182 (2), 168 (2), 164 (32), 150 (14), 135 (15), 111 (19), 109 (13).

**Methyl (4a*S*, 8a*R*, 9*R*, 11*S*)-15-[1,2,4,4a,5,6,7,8,8a,9,10,11,12,17-Tetradecahydro-11-(methoxycarbonyl)-indolo-(2’,3’:6,7)azonino(1,2,3-bc)isoquinolin-11-yl]Na-demethyl-Na-formylvindoline.** To a solution of 25 mg (0.031 mmol) of methyl (4a*S*, 8a*R*, 9*R*, 11*S*)-15-[1,2,4,4a,5,6,7,8,8a,9,10,11,12,17-tetradecahydro-11-(methoxycarbonyl)-indolo-(2’,3’:6,7)azonino(1,2,3-bc)isoquinolin-11-yl] vindoline(**14**) in 6 cm3  of sodium distilled tetrahydrofuran, at -65 oC, was added dropwise, with vigorous stirring, over 3 min, a solution of 302 mg of sodium dichromate dihydrate in 1.8 cm3  of water and 0.206 cm3  of sulfuric acid, keeping the reaction medium at -55 oC. After stirring at -60 to -65 oC for 3 h the mixture was poured into 4.3 cm3  of 28% ammonium hydroxide in 24 cm3  of water, rinsing the reaction flask with 3  5 cm3  of dichloromethane. Separation of phases, extraction with 4  5 cm3  of dichloromethane, washing of the combined organic solutions with 10 cm3  of 5% Na2S2O5 solution, drying over MgSO4 and concentration under vacuum gave 23 mg (90%) of the title product. TLC *Rf* = 0.19 (SiO2, ethyl acetate-ethanol 1:1, CAS blue).

**Methyl (4a*R*, 8a*S*, 9*R*, 11*S*)-15-[1,2,4,4a,5,6,7,8,8a,9,10,11,12,17-Tetradecahydro-11-(methoxycarbonyl)-indolo-(2’,3’:6,7)azonino(1,2,3-bc)isoquinolin-11-yl]Na-demethyl-Na-formylvindoline.** Using the preceding procedure, 20 mg (0.024 mmol) of methyl (4a*R*, 8a*S*, 9*R*, 11*S*)-15-[1,2,4,4a,5,6,7,8,8a,9,10,11,12,17-tetradecahydro-11-(methoxycarbonyl)-indolo-(2’,3’:6,7)azonino(1,2,3-bc)isoquinolin-11-yl] vindoline(**15**) in 6 cm3  of tetrahydrofuran was oxidized with 242 mg of sodium dichromate dihydrate in 1.5 cm3  of water and 0.165 cm3  of sulfuric acid. The reaction mixture was poured into 3.5 cm3  of 28% ammonium hydroxide in 20 cm3  of water and extracted with dichloromethane. After washing of the extracts with 5% Na2S2O5 solution and drying (MgSO4), concentration gave 18 mg (89%) of the title product TLC *Rf* = 0.22 (SiO2, ethyl acetate-ethanol, 1:1, CAS purple).

***For Scheme 8: (9R,11S)-15-[1,2,4,9,10,11,12,17-Octahydro-11-(methoxycarbonyl)-indolo(2’,3’ : 6,7)azonino(1,2,3-bc)isoquinolin-11-yl]vindoline (18) and its (9S,11R)-Diastereomer 137.***

**1,4-Dihydro-3H-2-benzopyran-3-one (129).** To 6.60 g (0.050 mol) of 2-indanone (**128)** in 50 cm3  of dry dichloromethane was added 38.0 g (0.45 mol) of powdered anhydrous sodium bicarbonate, followed by 17.0 g (0.10 mol) of *m*-chloroperoxyxbenzoic acid. After stirring at 20 oC for 20 h, further 3.0 g (0.017 mol) of the peracid was added and stirring continued for 24 h. After addition of 200 cm3  of 10% aqueous Na2S2O3 stirring was continued until two clear phases had formed. The organic solution was separated and the aqueous phase was extracted with two 100 cm3  portions of dichloromethane. The combined organic solutions were dried (MgSO4) and concentrated under vacuum at 30 oC. Solution in a mixture of ether and pentane, filtration and concentration under vacuum gave 6.7 g (90%) of the title lactone, which could be recrystallized from ether or sublimed at 30-40 oC (0.25 mm); mp 78-79 oC; TLC *Rf* = 0.36 (SiO2, CH2Cl2, brown-orange with iodine); NMR (270 MHz, CDCl3) H3.70 (s, 2 H), 5.30 (s, 2 H), 7.27 (m, 4 H); EI MS *m/z* 148 (M+, 35%), 104 (100), 91 (34), 78 (32). Anal. Calcd for C8H8O2: C, 72.96; H, 5.44. Found: C, 72.62; H, 5.37.

**3,4-Dihydro-1H-2-benzopyran-3-o1 (130).** To a solution of 3.00 g (0.020 mol) of 1,4-dihydro-3H-2-benzopyran-3-one (**129**) in 100 cm3  of dry dichloromethane, cooled to -78 oC, was added dropwise, over 1 h, 24 cm3  (0.022 mol) of a 1 M solution of diisobutyl aluminum hydride in dichloromethane. After stirring at -78 oC for 2 h and at 0 oC for 15 min, 100 cm3  of ether was added, followed by dropwise addition of 1.2 N HCl until a pH of 1-2 was reached. Separation of the organic phase, extraction of the aqueous phase with ether and concentration of the combined dried (MgSO4) extracts provided 2.8 g (91%) of the title lactol. This product decomposes on standing or on chromatography on silica gel and consequently it was used directly for the next reaction step. TLC *Rf* = 0.13 (SiO2, CH2Cl2, brown-orange CAS and heat); NMR (270 MHz, CDCl3) H 2.81 (dd, *J* 5, 16, 1 H), 3.10 (dd, *J* 3, 16, 1 H), 4.00 (m, 1 H), 4.75 (d, *J* 15, 1 H), 4.95 (d, *J* 15, 1 H), 5.32 (dd, *J* 4, 5, 1 H), 7.00-7.20 (m, 4 H); EI MS *m/z* , 150 (M+, 11%), 105 (15), 104 (100), 103 (21), 91 (9), 78 (19), 77 (16).

**Racemic Methyl (3a*RS*, 4*RS*, 11b*SR*)-3-(Benzyl)-1,2,3,3a, 4,5-hexahydro-4-[2-(hydroxymethyl)phenyl]-3-(phenylmethyl)-7H-pyrrolo[2,3-d]carbazole-6-carboxylate (131).** To 3.66 g (0.015 mol) of methyl 1,2,3,4,5,6- hexahydroazepino (4, 5-b)-indole-5-carboxylate (**60**) in 200 cm3  of dichloromethane was added, in one portion, 1.95 g (0.014 mol) of the lactol 3,4-dihydro-1H-2-benzopyran-3-ol (**130**) followed by 90 mg (0.0015 mol) of boric acid. The mixture was stirred at room temperature for 3 days, when TLC showed complete reaction of the lactol. The mixture was concentrated under vacuum and the residual solid foam was dissolved in 150 cm3  of dry chloroform. After addition of 6 cm3  of benzyl bromide the reaction mixture was heated at reflux for 8 h, resulting in formation of a heterogeneous suspension. Concentration under vacuum and trituration of the residue with a 1:1 ether: pentane mixture, followed by addition of more pentane, deposited a solid. After washing the solid with pentane, it was added to 150 cm3  of dry methanol and 8 cm3  of triethylamine. The mixture was heated at reflux for 10 h and the solution was then concentrated under vacuum. Partitioning the residue between dichloromethane and 10% aqueous sodium carbonate, follwed by adsorption of the dried (MgSO4) organic extract on 40 g of silica gel, which was then applied to a 300 g silica gel dry column, and elution with 1:4 ethyl acetate: pentane, gave 3.5 g (50% yield) of the racemic title compound, which crystallized from ether with mp 181-182 oC. TLC *Rf* = 0.25 (SiO2, ethyl acetate: pentane 1:2, CAS blue, yellow center); NMR (270 MHz, CDCl3) H 1.80 (dd, *J* 5, 12, 1 H), 1.90 (m, 1 H), 2.20 (ddd, *J* 12, 12, 6, 1 H), 2.82 (m, 3 H), 3.05 (dd, *J* 9, 6, 1 H), 3.47 (s, 2 H), 3.50 (s, 3 H), 3.28 (d, *J* 13, 1 H), 4.08 (d, *J* 13, 1 H), 4.67 (d, *J* 12, 2 H), 6.01 (d, *J* 8, 1 H), 6.80-7.40 (m, 12 H), 8.94 (s, 1 H). NMR (67.9 MHz, CDCl3, 4o carbons underlined, (-) for CH2, determined by DEBT study) C 168.5, 164.3, 143.3, 141.7, 138.9, 138.1, 137.0, 129.0, 128.4, 128.3, 128.1, 127.2, 127.0, 125.9, 122.4, 120.7, 109.3, 90.8, 71.7, (-)62.7, (-)58.7, 56.1, 50.7, (-)50.5, (-)41.8, (-)40.6, (-)25.9; EI MS *m/z* (relative intensity) 466 (35), 332 (26), 252 (100), 227 (11), 144 (23), 91 (91). Anal. Calcd for C30H30N2O3: C, 77.23; H, 6.48; N, 6.00. Found: C, 77.07; H, 6.69; N, 5.90.

**Racemic Methyl (3a*RS*,4*RS*,11b*SR*)-3-(Benzyl)-4-[2-(*tert-* butyldimethylsilyloxymethyl) phenyl]-1,2,3,3a,4,5-hexahydro-7H-pyrrolo[2,3-d] carbazole-6-carboxylate (132).** To a solution of 1.492 g (3.20 mmol) of racemic methyl (3a*RS*,4*RS*,11b*SR*)-3-(benzyl)-1,2,3,3a,4,5-hexahydro-4-[2-(hydroxymethyl)phenyl]-3-(phenylmethyl)-7H-pyrrolo[2,3-d] carbazole-6-carboxylate (**135**) in 60 cm3  of dry dichloromethane was added 0.535 cm3  (3.84 mmol) of dry triethylamine, followed by dropwise addition of 0.743 cm3  (3.23 mmol) of *tert*-butyl dimethylsilyl triflate. TLC indicated direct completion of the reaction. Water (20 cm3  ) was added, the organic phase separated, and the aqueous portion extracted once with dichloromethane. Concentration of the combined dried (MgSO4) organic solutions and chromatography on 50 g of silica gel, eluting with 1:99 methanol: dichloromethane gave 1.75 g (93%) of the title compound. UV (EtOH) max/nm 195, 200, 295, 325; IR (film) max/cm-1 3379, 3028, 3002, 2951, 2928, 2900, 2883, 2855, 2800, 1680, 1612, 1465, 1437, 1279, 1249, 1210, 1129, 1080, 1055, 988, 777, 748, 700; NMR (270 MHz, CDCl3) H0.11 (s, 6 H), 0.95 (s, 9 H), 1.80 (dd, *J* 12, 5, 1 H), 2.19 (ddd, *J* 12, 12, 6, 1 H), 2.61-2.72 (m), 2.80 (m, 3 H), 3.02 (dd, *J*  9, 6, 1 H), 3.40 (s, 1 H), 3.47 (s, 1 H), 3.55 (s, 3 H), 3.79 (d, *J* 13, 1 H), 4.13 (d, *J* 13, 1 H), 4.76 (d, *J* 13, 2 H), 5.94 (d, *J* 8, 1 H), 6.78 (t, *J* 8, 1 H), 6.90 (m, 2 H), 7.08 (t, *J* 7, 1 H), 7.09 (d, *J* 8 1 H), 7.23 (t, *J* 7, 1 H), 7.34 (m, 6 H), 9.02 (s, 1 H); NMR (67.9 MHz, CDCl3, 4o C’s underlined, 1o and 3o C’s normal, 2o C’s * from DEPT spectrum) C168.7, 164.9, 143.6, 141.6, 139.2, 138.2, 137.3, 129.0, 128.4, 128.2, 128.2, 127.5, 127.1, 126.6, 125.6, 122.6, 120.8, 109.4, 91.2, 76.6, 72.3, 63.3*, 58.7*, 56.2, 50.7, 50.5*, 42.1*, 40.5, 26.1, 25.5*, 18.5; MS (EI) *m/z* 580 (M+, 17%), 366 (65), 332 (26), 253 (9), 234 (11), 207 (16), 191 (14), 109 (25), 149 (37), 147 (80), 144 (24), 133 (15), 115 (11), 91 (85), 84 (100).

**Methyl (5R,7S)-3-(Benzyl)-5-[2-(*tert-*butyldimethylsilyloxymethyl)phenyl]-1,2,3,4,5,6,7,8-octahydroazonino[5,4-b]indole-7-(15-vindolinyl)-7-carboxylate** (**133**) **and its (5S,7R)-Diastereomer (134).** To a solution of 1.06 g (1.83 mmol) of racemic methyl (3a*RS*,4*RS*,11b*SR*)-3-(benzyl)-4-[2(*tert-* butyldimethylsilyloxymethyl))phenyl]-1,2,3,3a,4,5-hexahydro-7H-pyrrolo[2,3-d]carbazole-6-carboxylate (**132**) in 30 cm3  of dry dichloromethane, cooled to 0 oC, was added 0.301 cm3  (2.74 mmol) of triethylamine, followed by 0.320 cm3  (2.74 mmol) of *tert-*butyl hypochlorite. After stirring for 5 min TLC indicated complete reaction of the starting material. The solution was washed with 10 cm3  of water and the aqueous wash extracted with 2  20 cm3  of dichloromethane. The combined organic extracts were dried (MgSO4), concentrated under vacuum and dissolved in 60 cm3  of dry acetone. At 0 oC, in the dark, 765 mg (1.55 mmol) of vindoline hydrochloride was added on one portion, followed after 5 min at 0 oC by 1.069 g (5.48 mmol) of silver tetrafluoroborate. The mixture was stirred at 0 oC for 30 min and then partitioned between 50 cm3  of dichloromethane and 100 cm3  of 3% ammonium hydroxide in brine. Five extractions of the aqueous phase with 50 cm3  of dichloromethane and concentration of the combined, dried (MgSO4) extracts under vacuum gave methyl (3a*R*,4*R*,11b*S*,6*S*)-3-(benzyl)-4-[2-(*tert-*butyldimethylsilyloxymethyl)phenyl]-2,3,3a,4,5,6-hexahydro-1H-pyrrolo[2,3-d]carbazole-6-(15-vindolinyl)-6-carboxylate and its (3a,*S*,4*S*,11b*R*,6*R*)-diastereomer, in a 1:1 ratio, as a solid foam. This product was dissolved in 50 cm3  of acetic acid and 987 mg (18.3 mmol) of KBH4 was added in small portions over 30 min. After further 5 min, the solution was poured into 300 cm3  of conc. ammonium hydroxide and ice and extracted with 5  50 cm3  of dichloromethane. Concentration of the dried (MgSO4) extracts under vacuum and chromatography of the residue on 100 g of silica gel, eluting first with 1:1 ethyl acetate: pentane, followed by 2:1 ethyl acetate: pentane, provided 649 mg (41%) of (5*R*,7*S*)-title compound (**137**). TLC *Rf* = 0.28 (SiO2, 1:1 ethyl acetate: pentane, CAS brown-green), followed by 757 mg (47%) of its (5*S*,7*R*)-diastereomer **138**, TLC *Rf* = 0.15 (SiO2, 2:1 ethyl acetate: pentane, CAS brown-green).

For product **133**: UV (EtOH) max/nm212, 255, 285; IR (film) max/cm-13468, 3059, 3027, 2952, 2929, 2902, 2895, 2879, 2856, 2800, 1742, 1615, 1498, 1460, 1432, 1370, 1247, 1228, 1109, 1045, 837, 734; NMR (270 MHz, CDCl3) H -0.10 (s, 3 H), -0.05 (s, 3 H), 0.84 (s, 12 H), 1.35 (m, 1 H), 1.63 (m, 1 H), 1.81 (m, 2 H), 2.11 (s, 3 H), 2.49 (s, 1 H), 2.62 (m, 5 H), 2.70 (s, 3 H), 3.05 (s, 1 H), 3.20 (t, *J* 15, 2 H), 3.47 (s, 3 H), 3.64 (s, 3 H), 3.70 (s, 1 H), 3.79 (s, 3 H), 3.31-3.79 (m, 6 H), 4.04 (ABd, *J* 12, 13, 2 H), 5.30 (d, *J* 10, 1 H), 5.46 (s, 1 H), 5.84 (dd, *J* 10, 4, 1 H), 6.00 (s, 1 H), 6.76-7.43 (m, 14 H), 8.04 (s, 1 H), 9.90 (s, 1 H); NMR (67.9 MHz, CDCl3, 4o C’s underlined, 1o and 3o C’s normal, 2o C’s * from DEPT spectrum) C175.1, 171.7, 170.8, 158.4, 152.9, 144.5, 139.8, 136.9, 134.9, 132.7, 130.2, 129.6, 128.1, 127.9, 127.2, 126.7, 126.3, 125.5, 124.9, 124.7, 124.4, 123.4, 122.1, 122.0, 119.0, 118.3, 114.7, 110.4, 94.3, 83.5, 79.8, 77.2, 76.5, 66.1, 62.9*, 62.5*, 62.3, 62.1*, 57.0, 55.5, 53.3*, 53.2, 52.3, 52.0, 50.2*, 50.0*, 44.7*, 42.9, 38.6, 37.6*, 36.9, 30.9*, 26.0, 21.0, 18.3, 8.4, -2.8; MS (EI) *m/z* 1037 (M+1+, 7%), 788 (9), 629 (5), 537 (8), 366 (12), 331 (12), 281 (13), 260 (23), 134 (30), 133 (31), 121 (16), 120 (20), 106 (17), 99 (13), 96 (14), 90 (60), 83 (14), 72 (25), 68 (25), 54 (100).

For product **134**: UV (EtOH) max/nm216, 258, 290, 302; IR (film) max/cm-1 3460, 3410, 3027, 2951, 2930, 2879, 2856, 1744, 1615, 1498, 1460, 1432, 1370, 1248, 1110, 1057, 1044, 838, 777, 735 cm-1; NMR (270 Mhz, CDCl3) H-0.11 (s, 6 H), 0.38 (s, 3 H), 0.84 (s, 9 H), 1.60 (m, 2 H), 2.07 (s, 3 H), 2.10 (s, 1 H), 2.74 (s, 3 H), 2.20-2.75 (m, 9 H), 2.95-3.70 (m, 13 H), 3.79 (s, 6 H), 4.33 (m, 2 H), 5.17 (d, *J* 10, 1 H), 5.38 (s, 1 H), 5.80 (m, 1 H), 6.10 (s, 1 H), 6.75 (m, 1 H), 7.00-7.45 (m, 13 H), 9.89 (m, 1 H); NMR (67.9 MHz, CDCl3, 4o C’s underlined, 1o and 3o C’s normal, 2o C’s * from DEPT spectrum) C MS (EI) *m/z* 977 (M-CO2CH3 or M-CH3CO2+, 2%), 788 (100), 759 (8), 729 (10), 698 (20), 669 (14), 655 (26), 629 (46), 610 (15), 537 (42), 495 (18), 455 (15), 366 (18), 332 (13), 282 (9), 261 (20), 134 (19), 91 (45).

**Methyl (5*R*,7*S*)-3-(Benzyl)-5-[2-(hydroxymethyl)phenyl]-1,2,3,4,5,6,7,8-octahydroazonino[5,4-b]indole-7-(15-vindolinyl)-7-carboxylate (135).** To a solution of 564 mg (0.544 mmol) of methyl (5*R*,7*S*)-3-(benzyl)-5-(*tert-* butyldimethylsilyloxymethyl)phenyl]-1,2,3,4,5,6,7,8-octahydroazonino[5,4-b]indole-7-(15-vindolyl)-7-carboxylate (**133**) in 13 cm3  of tetrahydrofuran was added 6.5 cm3  of water, followed by 1.87 g (10.9 mmol) of *p-*toluensulfonic acid monohydrate. After stirring at 20 oC for 45 min TLC indicated completion of the silyl ether cleavage. Addition of 20 cm3  of dichloromethane and enough 10% aqueous Na2CO3 to adjust the pH to 8-9, separation of phases and extraction with 4  30 cm3  of dichloromethane, drying (MgSO4) of the combined extracts and concentration under vacuum provided a crude product, which was chromatographed on 20 g of silica gel, eluting 441 mg (88%) of the title product with ethyl acetate. TLC *Rf* = 0.21 (SiO2, ethyl acetate, CAS brown-purple to yellow to brown-blue); UV (EtOH) max/nm212, 258, 284, 292, 312; IR (film) max/cm-13664, 3026, 2948, 2937, 2878, 2839, 2801, 1742, 1615, 1497, 1459, 1432, 1371, 1302, 1243, 1040, 736; NMR (270 MHz, CDCl3) H0.79 (t, *J* 7, 3 H), 1.38 (m, 3 H), 1.75 (m, 3 H), 2.09 (s, 3 H and m, 1 H), 2.46 (s, 1 H), 2.61 (brds, 2 H), 2.68 (s, 3 H), 2.76 (m, 4 H), 2.97 (m, 1 H), 3.15 (Abq, 2 H), 3.45 (s, 3 H), 3.64 (s, 3 H), 3.69 (s, 1 H), 3.77 (s, 3 H), 3.45-3.81 (m, 6 H), 3.90 (d, *J* 10, 1 H), 5.28 (d, *J* 10, 1 H), 5.42 (s, 1 H), 5.80 (dd, *J* 10, 4, 1 H), 5.99 (s, 1 H), 6.66 (s, 1 H and d, *J* 6, 1 H), 6.75 (t, *J* 8, 2 H), 6.94 (t, *J* 7, 1 H), 7.00-7.40 (m, 9 H), 8.14 (brs, 1 H), 9.90 (brs, 1 H); NMR (67.9 MHz, CDCl3, 4o C’s underlined, 2o C’s* from DEPT) C175.1, 171.7, 170.8, 158.5, 153.3, 146.3, 139.6, 136.9, 135.1, 132.7, 130.3, 129.6, 128.3, 128.2, 128.0, 127.9, 126.4, 125.9, 125.8, 124.5, 124.0, 122.1, 122.0, 119.1, 118.4, 114.5, 110.5, 94.5, 83.6, 79.9, 77.2, 76.7, 65.8, 62.8*, 62.7*, 60.3*, 57.3, 55.7, 53.4, 53.3*, 52.3, 52.0, 50.2*, 49.8*, 44.6*, 43.0, 38.7, 38.7*, 31.0*, 25.6*, 21.0, 14.2, 8.4; MS (EI) *m/z* 863 (M-CO2CH3 or M-CH3CO2+, 0.6%), 788 (17), 537 (10), 366 (17), 343 (12), 332 (23), 282 (30), 261 (54), 255 (12), 214 (18), 188 (12), 144 (10), 135 (65), 134 (52), 122 (37), !21 (29), 107 (27), 93 (23), 91 (100), 86 (24), 84 (38).

**Methyl (5*S*,7R)-3-(Benzyl)-5-[2-(hydroxymethyl)phenyl]-1,2,3,4,5,6,7,8-octahydroazonino[5,4-b]indole-7-(15-vindolinyl)-7-carboxylate (136)**. The desilylation of compound **134** (626 mg, 0.604 mmol) was carried out as described above for its epimer **133** to produce 496 mg (89% yield) of the title product, crystallized from ether. TLC *Rf* = 0.15 (SiO2, CH2Cl2/MeOH, 95 : 5, CAS brown-purple to yellow to brown-blue); UV (EtOH) max/nm 214, 258, 288; IR (film) max/cm-13661, 3445, 3021, 3000, 2956, 2946, 2907, 2880, 2841, 1742, 1615, 1498, 1459, 1432, 1371, 1242, 1039, 739; NMR (270 MHz, CDCl3) H0.51 (t, *J* = 7 Hz, 3 H), 1.30 (m, 1 H), 1.52 (m, 1 H), 2.10 (s, 3 H), 2.19 (m, 1 H), 2.64 (s, 1 H), 2.78 (s, 3 H), 3.45 (s, 3 H), 3.64 (s, 3 H), 3.77 (s, 1 H), 3.79 (s, 3 H), 2.50-3.88 (m, 16 H), 4.22 (m, 2 H), 5.34 (s, 1 H), 5.40 (d, *J* 10, 1 H), 5.88 (dd, *J* 10, 5, 1 H), 6.04 (s, 1 H), 6.73 (s, 1 H), 7.09-7.27 (m, 11 H), 7.44 (t, *J* 8, 2 H), 7.65 (m, 1 H), 7.99 (m, 1 H), 9.37 (m, 1 H); NMR (67.9 MHz, CDCl3, 4o C’s underlined, 2o C’s* from DEPT) C175.3, 171.2, 171.1, 159.0, 153.1, 144.0, 139.5, 137.5, 134.8, 133.0, 130.3, 129.5, 128.7, 128.4, 127.9, 127.2, 126.5, 125.9, 124.2, 123.8, 122.8, 121.7, 121.1, 118.9, 118.4, 114.6, 110.3, 93.7, 83.0, 80.3, 77.2, 76.4, 65.5, 64.0*, 62.0*, 60.1*, 55.3, 54.8*, 53.8, 52.2, 51.9, 50.3*, 49.8*, 44.5*, 42.8, 38.1, 37.4*, 30.6*, 27.0*, 21.0, 8.0; MS (EI) *m/z* 924 (M+ , 1%), 863 (M-CO2CH3 or M-CH3CO2+, 0.8), 789 (30), 629 (11), 537 (11), 366 (13), 332 (15), 297 (7), 282 (20), 261 (31), 214 (12), 135 (46), 134 (38), 122 (29), 121 (24), 108 (11), 107 (22), 93 (20), 91 (100), 75 (32).

**(9*R*,11*S*)-15-[1,2,4,9,10,11,12,17-Octahydro-11-(methoxycarbonyl)-indolo(2’,3’ : 6,7)azonino(1,2,3-bc)isoquinolin-11-yl]vindoline (18).** To a solution of 350 mg (0.380 mmol) of the alcohol methyl (5*R*,7*S*)-3-(benzyl)-5-[2-(hydroxymethyl)phenyl]-1,2,3,4,5,6,7,8-octahydroazonino[5,4-b]indole-7-(15-vindolinyl)-7-carboxylate (**135**) in a 20 cm3  of dry dichloromethane, at 20 oC, was added 0.07 cm3  (0.493 mmol) of dry triethylamine, followed by 151 mg (0.455 mmol) of *p-*toluenesulfonic anhydride, in small portions over 30 min. After an additional 5 min, TLC showed complete reaction of the starting alcohol. The solvent was evaporated under vacuum and the concentrate dissolved in 30 cm3  of dry methanol. Under argon, 170 mg of 10% Pd/C was added and the mixture was then stirred under hydrogen for 30 min at 20 oC. Filtration through Celite 545 and washing of the catalyst with 1:1 methanol: dichloromethane, concentration under vacuum, partitioning between dichloromethane and 5% aqueous sodium bicarbonate and concentration of the dried (MgSO4) extract gave a crude product, which was chromatographed on 15 g of silica gel. Elution with ethyl acetate followed by 4:1 ethyl acetate: ethanol gave 160 mg (52%) of the title product from the second eluent. TLC *Rf* = 0.5 (SiO2, 4:1 ethyl acetate: ethanol); NMR (270 MHz, CDCl3) H0.85 (t, *J* 7, 3 H), 1.39 (q, *J*  7, 1 H), 1.63 (s, H2O), 1.82 (m, 2 H), 2.12 (s, 3 H, m, 1 H), 2.44 (m, 2 H), 2.71 (s, 1 H, m, 1 H), 2.76 (s, 3 H), 2.82 (d, *J* 16, 1 H), 3.00 (dd, *J* 16, 5, 1 H), 3.59 (s, 3 H), 3.22-3.68 (m, 8 H), 3.77 (s, 1 H), 3.81 (s, 3 H), 3.86 (s, 3 H), 4.15 (AB, *J* 15, 2 H), 5.32 (d, *J* 11, 1 H), 5.49 (s, 1 H), 5.86 (dd, *J* 10, 4, 1 H), 6.22 (s, 1 H), 6.69 (d, *J*  7, 1 H), 6.73 (s, 1 H), 7.12 (m, 6 H), 7.57 (d, *J* 8, 1 H), 8.06 (brd s, 1 H), 9.85 (brd s, 1 H); NMR (67.9 MHz, CDCl3, 4o C’s underlined, 2o C’s* from DEPT) C 174.2, 171.6, 170.7, 158.2, 153.0, 141.5, 136.4, 135.0, 131.0, 130.0, 129.4, 127.5, 126.4, 125.8, 124.3, 123.6, 123.2, 122.2, 121.5, 118.9, 118.2, 110.4, 94.2, 83.3, 79.6, 77.1, 76.2, 66.1, 55.9, 55.8, 53.8*, 53.2, 52.1, 52.0, 51.5*, 50.5*, 50.3*, 47.2*, 44.4*, 42.7, 39.1, 38.2, 30.8*, 23.9*, 20.9, 8.3; MS (EI) *m/z* 814 (M+ , 0.4%), 784 (3), 756 (2), 655 (8), 358 (6), 274 (29), 205 (10), 158 (36), 144 (21), 143 (14), 130 (13), 129 (11), 115 (11), 101 (13), 84 (100), 69 (32), 56 (100).

**(9*S*,11*R*)-15-[1,2,4,9,10,11,12,17-Octahydro-11-(methoxycarbonyl)-indolo(2’,3’ : 6,7)azonino(1,2,3-bc)isoquinolin-11-yl]vindoline (137)**. Cyclization of 185 mg (0.20 mmol) of the alcohol **136** and debenzylation, following the preceding procedure, gave 73 mg (45% yield) of the title compound, obtained after chromatography on 10 g of silica gel, eluting first with ethyl acetate/pentane, 4 : 1, then ethyl acetate for elution of the product.The compound was quite unstable on brief storage. TLC *Rf* = 0.13 (SiO2, ethyl acetate, CAS brown, then dark grey); NMR (250 MHz, CDCl3) H 0.27 (t, *J* 7, 3 H), 1.10 (m, 1 H), 1.62 (m, 1 H), 2.10 (s, 3 H), 2.52 (s, 1 H), 2.20-2.50 (m, 5 H), 2.81 (s, 3 H), 3.00 (dd, *J* 16, 5, 1 H), 3.56 (s, 3 H), 3.85 (s, 7 H), 3.25-3.70 (m, 9 H), 4.20 (AB, *J* 15, 2 H), 5.16 (d, *J* 10, 1 H), 5.52 (s, 1 H), 5.79 (dd, *J* 1, 3, 1 H), 6.30 (s, 1 H), 6.68 (d, *J* 7, 1 H), 6.90 (s, 1 H), 7.10-7.30 (m, 6 H), 7.58 (d, *J* 8, 1 H), 8.12 (s, 1 H), 9.80 (brd s, 1 H); MS (CI) *m/z* transmethylation signal 829 (0.7%), 815 (M+1+ , 1), 756 (0.3), 205 (8), 157 (5), 144 (14), 130 (6), 116 (16), 84 (25); MS (EI) *m/z* (relative intensity) 753 (0.1), 653 (0.1), 539 (0.1), 379 (0.6), 358 (1), 274 (2), 205 (1), 158 (2), 143(2), 129 (2), 115 (2), 84 (33), 52 (32), 51 (19), 50 (100).

**(9*R*,11*S*)-15-[1,2,4,9,10,11,12,17-Octahydro-11-(methoxycarbonyl)-indolo(2’,3’ : 6,7)azonino(1,2,3-bc)isoquinolin-11-yl]Na-demethyl-Na-formylvindoline**. To a solution of 10 mg (0.012 mmol) of (9*R*,11*S*)-15-[1,2,4,9,10,11,12,17-octahydro-11-(methoxycarbonyl)-indolo(2’,3’ : 6,7)azonino(1,2,3-bc)isoquinolin-11-yl]vindoline(**18**) in 6 cm3  of dry tetrahydrofuran at -65 oC was added dropwise, over 2 min, with rapid stirring a solution of 122 mg of sodium dichromate dihydrate in 0.80 cm3  of water and 0.083 cm3  of conc. sulfuric acid, holding the temperature below -55 oC. After stirring at -60 to -65 oC for 3 h the mixture was poured into 1.8 cm3  of 28% ammonium hydroxide dissolved in 10 cm3  of water, rinsing the reaction flask with 3  5 cm3  of dichloromethane. After phase separation and extraction of the aqueous portion with 4  5 cm3  of dichloromethane, the combined organic extracts were washed with 10 cm3  of 5% aqueous sodium thiosulfate, dried (MgSO4) and concentrated under vacuum to 9 mg (90%) of the title formamide.

***For Scheme 9: Tetrahydropyrano Congeners 19 and 20.***

**Methyl (Tetrahydro-4H-pyran-4-ylidene)-acetate.** To a solution of tetrahydro-4-pyranone (5.00 g, 50 mmol) and methyl (triphenylphosphoranylidene)acetate in 200 cm3  dry toluene was added benzoic acid (1.46 g, 12 mmol). The mixture was heated at reflux for 8 h under Ar. Evaporation of the solvent, and distillated gave 7.52 g (96.3%) of the title product as a colorless oil: bp 86-87 °C / 2 mm; IR (neat) nmax/cm-12952, 2918, 2848, 1717, 1653, 1436, 1387, 1285, 1251, 1232, 1204, 1176, 1150, 1098, 1030, 988; NMR (500 MHz, CDCl3) dH 5.69 (s, 1 H), 3.77 (t, *J* 6, 2 H), 3.74 (t, *J*  6, 2 H), 3.70 (s, 3 H), 3.01 (t, *J* 6, 2 H), 2.34 (t, *J* 6, 2 H); NMR (125 MHz, CDCl3) dC 165.9, 157.1, 113.5, 68.4, 67.8, 50.1, 37.0, 30.5; MS (CI), *m/z* 157 (32%), 156 (M+, 64), 126 (64), 125 (100), 123 (26), 122 (31), 111 (31), 105 (57), 97 (33), 96 (55), 95 (47), 83 (14), 81 (11), 79 (10), 77 (26), 69 (15), 68 (16), 67 (42), 66 (29), 65 (21), 59 (11), 55 (16), 53 (14), 51 (20).

**Tetrahydro-4H-pyran-4-ylideneacetic acid (138) and 4-Tetrahydro-4H-pyran-3-enylacetic acid (139)**.A solution of methyl (tetrahydro-4H-pyran-4-ylidene)acetate (7.25 g, 46 mmol) and 64 cm3  of 50 % KOH in 120 cm3  of ethanol was heated at reflux for 22 h. After concentration under reduced pressure, the residue was cooled to 0 °C, acidified with concentrated HCl to pH 3 and extracted with CH2Cl2 (3 ´ 50 cm3  ). The combined extracts were washed with brine (2 ´ 30 cm3  ) and dried over MgSO4. Concentration gave a mixture of double bond isomers **138** and **139** in a 17:83 ratio, which was separated by chromatography (SiO2, EtOAc/hexane/AcOH, 60:30:2).

For the *a*, *b*-unsaturated acid **138** (1.04 g, 16.0%): mp 84-85 °C (crystallized from hexane); IR (CH2Cl2) nmax/cm-12982, 2925, 2854, 1696, 1638, 1423, 1277, 1225, 1160, 1092, 1004; NMR (500 MHz, CDCl3) dH 5.72 (s, 3 H), 3.79 (t, *J* 6, 2 H), 3.75 (t, *J* 6, 2 H), 3.01 (t, *J* 6, 2 H), 2.37 (t, *J* 6, 2 H), 2.10 (s, 1 H); NMR (125 MHz, CDCl3) dC 171.3, 159.8, 114.0, 68.8, 68.2, 37.6, 31.1; MS (CI), *m/z* 143 (16%), 142 (M+, 34), 125 (37), 112 (100), 111 (85), 96 (6), 98 (6), 97 (42), 96 (36), 95 (13), 94 (9), 84 (9), 83 (14), 85 (5), 85 (4), 84 (10), 83 (100), 81 (12).

For the *b*, *g*-unsaturated acid **139** (5.08 g, 77.8%): mp 68-69 °C (crystallized from hexane); IR (CH2Cl2) nmax/cm-1 2968, 2940, 2854, 1730, 1716, 1651, 1559, 1417, 1388, 1246, 1175, 1125; NMR (500 MHz, CDCl3) dC 5.65 (s, 1 H), 4,15 (t, *J* 1, 2 H), 3.81 (t, *J* 6, 2 H), 3.06 (s, 2 H), 2.18 (d, *J* 1, 2 H), 2.10 (s, 1 H); NMR (125 MHz, CDCI3) dC 176.4, 128.5, 124.4, 65.1, 64.0, 42.1, 28.2; MS (CI), *m/z* 143 (M+1+, 13%), 125 (2), 124 (9), 113 (4), 112 (3), 111 (3), 110 (2), 99 (3), 98 (2), 97 (8), 96 (11), 86 (5), 85 (4), 84 (10), 83 (100), 81 (12), 79 (3), 71 (9), 68 (7), 67 (13); HRMS (FAB), calcd for (M+1)+ C7H11O3 143.0708, found 143.0702.

**3-Hydroxymethyl-tetrahydro-4H-pyran-4-ylideneacetic Acid Lactone** **(140).** A solution of tetrahydron-4H-pyran-3-enylacetic acid **139** (12.30 g, 87 mmol) and paraformaldehyde (5.20 g, 173 mmol) in 100 cm3  of acetic acid containing 1.5 cm3  of concentrated H2SO4 was heated under reflux for 10 h. The mixture was cooled to room temperature, and 2.0 g of sodium acetate was added. After concentration under reduced pressure, the dark residue was dissolved in 200 cm3  of CH2Cl2, the resulting solution was washed with brine (2 ´ 30 cm3  ), dried over MgSO4, and concentrated. Distillation of the residue in vacuum afforded 8.73 g of crystalline distillate at 164-169 °C/2 mm, which was recrystallized from 500 cm3  Et2O to give 6.48 g (48.4%) of lactone **140**:mp 105-107 °C; UV (EtOH) lmax/nm 232; IR (CH2Cl2) nmax/cm-1 3068, 2940, 2918, 2859, 1711, 1471, 1325, 1275, 1238, 1080; NMR (500 MHz, CDCl3) dH 5.87 (t, *J* 2, 1 H), 4.36 (dd, *J* 7, 11, 1 H), 4.14 (m, 2 H), 3.93 (t, *J* 11, 1 H), 3.41 (dd, *J* 2, 11, 1 H), 3.08 (t, *J* 11, 1 H), 2.91 (m, 1 H), 2.59 (m, 1 H), 2.42 (dd, *J* 2, 16, 1 H); NMR (125 MHz, CDCl3) dC 163.7, 157.6, 114.8, 68.3, 66.8, 66.2, 34.2, 32.1; MS (CI), *m/z* 155 (10%), 154 (M+, 12), 136 (1), 127 (3), 126 (2), 125 (3), 124 (4), 123 (6), 110 (22), 109 (100), 99 (4), 96 (10), 95 (22), 94 (13), 83 (6), 82 (11), 81 (30), 80 (20), 79 (36), 77 (7); HRMS (FAB), calcd for (M+1)+ C8H11O3 155.0708, found 155.0710.

**3-Hydroxymethyl-tetrahydro-4H-pyran-3-enylacetic Acid Lactone (142).** To a solution of 3-hydroxymethyl-tetrahydro-4H-pyran-4-ylideneacetic acid lactone **140** (1.16 g, 7.5 mmol) in 50 cm3  of absolute ethanol was added KOH (4.20 g, 75 mmol). The mixture was heated at reflux for 25 h. After evaporation of the solvent, the residue was poured into crushed ice, and acidified to pH 3 with concentrated HCl. The mixture was extracted with CH2Cl2 (3 ´ 15 cm3 ). The combined dried (MgSO4) extracts were concentrated under reduce pressure. Chromatography (SiO2, EtOAc) gave lactone **142 (**0.62 g, 53.2%): IR (CH2Cl2) nmax/cm-1 2982, 2933, 2911, 2858, 1732, 1470, 1396, 1225, 1192, 1097, 1042, 977; NMR (500 MHz, CDCl3) dH 4.71 (s, 1 H), 4.04 (s, 2 H), 3.84 (t, *J* 5 Hz, 2 H), 3.03 (s, 2 H), 2.10 (s, 2 H); NMR (125 MHz, CDCl3) dC 168.6, 124.1, 122.8, 68.1, 64.0, 63.9, 33.7, 27.5; MS (CI), *m/z* 155 ( 11%), 154 (M+, 46), 153 (6), 152 (6), 151 (4), 140 (6), 139 (2), 127 (3), 126 (4), 125 (5), 124 (7), 123 (7), 112 (4), 111 (9), 110 (29), 109 (10), 97 (17), 96 (100), 95 (37), 83 (15), 81 (40), 80 (11), 79 (52); HRMS (FAB), calcd for (M+1)+ C8H11O3 155.0708, found 155.0701.

**General procedure for hydrogenation of the unsaturated lactones 140 and 142 (see Table VIII).** Catalyst (0.05 mmol) was placed in a 25 cm3  flask, and 2 cm3  of degassed solvent was added. The flask was evacuated and filled with hydrogen several times, the catalyst was allowed to become completely saturated with hydrogen. Unsaturated lactone **140** or **142** (1 mmol) in 5 cm3  of degassed solvent was injected into the flask through a septum, the mixture was hydrogenated under 1 atm of hydrogen at room temperature. After 10 h, the mixture was filtered through Celite 545, washed with CH2Cl2 and EtOH. The filtrate was concentrated under reduce pressure, the residue was chromatographed (SiO2, EtOAc/hexane/AcOH, 60:30:2) to give an inseparable mixture of cis and trans products.

For the cis product **141a**: IR (CH2Cl2) nmax/cm-1 2922, 2854, 1733, 1210, 1196, 1118, 1104, 1080, 1054; NMR (500 MHz, CDCl3) dH 4.62 (t, *J* 12, 1 H), 4.40 (dd, *J* 6, 12, 1 H), 3.96 (dt, *J* 4, 12, 1 H), 3.75 (dd, *J* 3, 12, 1 H), 3.64 (dd, *J* 3, 12, 1 H), 3.47 (m, 1 H), 2.74 (dd,  *J* 7, 18, 1 H), 2.46 (dd, *J* 4, 18, 1 H), 2.29 (m, 1 H), 2.13 (m, 1 H), 1.71 (m, 1 H), 1.64 (m, 1 H); NMR (125 MHz, CDCl3) dC 169.8, 68.5, 66.9, 66.8, 34.9, 31.8, 29.7, 28.2; MS (CI), *m/z* 157 (9%), 156 (M+, 11), 138 (5), 128 (9), 127 (9), 115 (4), 114 (4), 113 (7), 112 (5), 111 (6), 110 (6), 109 (3), 100 (46), 98 (8), 97 (100), 96 (18), 95 (9), 86 (21), 84 (70), 83 (68); HRMS (FAB), calcd for (M+1)+ C8H13O3 157.0865, found 157.0868.

For the trans **141b**: NMR (500 MHz, CDCl3) dH 4.32 (dd, *J* 5, 11, 1 H), 4 (dd, *J* 5, 12, 1 H), 3.90 (t, *J* 11, 1 H), 3.41 (dd, *J* 2, 12, 1 H), 3.08 (t, *J* 11, 1 H), 2.75 (dd, *J* 5, 18, 1 H), 2 (m, 1 H), 1.94 (m, 1 H), 1.82 (m, 1 H), 1.60-1.70 (m, 2 H), 1.42 (m, 1 H). The ratio of cis **141a** to trans **141b** was determined by integration of the double doublet at d 4.40 (cis) and d 4.32 (trans).

For the cis 3-methyltetrahhydropyran-4-yl acetic acid (contaminated by trans 3-methyltetrahhydropyran-4-yl acetic acid): NMR (500 MHz, CDCl3) dH 10.61 (s, br, 1H, vanished in the presence of D2O), 3.91 (t, *J* 4, 11, 1 H), 3.62 (dd, *J* 3, 11, 1 H), 3.52 (dd, *J* 3, 11, 1 H), 3.41 (dt, *J* 3, 11, 1 H), 2.15-2.77 (m, 3 H), 1.73-1.81 (m, 1 H), 1.51-1.63 (m, 1 H), 1.37-1.44 (m, 1 H), 0.91 (d, *J* 7, 3 H); NMR (125 MHz, CDCl3) dC 177.9, 73.3, 67.4, 37.5, 34.4, 32.2, 27.5, 11.4. The ratio of cis to trans 3-methyltetrahhydropyran-4-yl acetic acid was determined by integration of the doublet at d 0.91 (cis) and 0.84 (trans).

For the cis ethyl 3-hydroxymethyltetrahydropyran-4-yl acetate (contaminated by trans ethyl 3-hydroxymethyltetrahydropyran-4-yl acetate): NMR (500 MHz, CDCl3) dH 4.16 (q, *J* 7, 2 H), 4.05 (dd, *J* 3, 12, 1 H), 3.92 (t, *J* 4, 12, 1 H), 3.81 (dd, *J* 8, 12, 1 H), 3.72 (dd, *J* 8, 11, 1 H), 3.52 (m, 2 H), 2.65 (s, br, 1 H), 2.45 (dd, *J* 6, 14, 1 H), 2.30-2.40 (m, 2 H), 1.81 (m, 1 H), 1.50-1.65 (m, 2 H), 1.29 (t, *J* 7, 3 H); NMR (125 MHz, CDCl3) dC 172.6, 69.3, 67.5, 60.3, 60.1, 39.9, 37.5, 33.1, 29.1, 14.1; MS (CI), *m/z* 203 (M+1+, 35%), 186 (11), 185 (35), 184 (9), 158 (9), 157 (29), 156 (9), 155 (9), 139 (12), 138 (6), 128 (6), 127 (10), 111 (14), 110 (24), 100 (19), 97 (100), 96 (12), 84 (10), 83 (35), 81 (22). The ratio of cis to trans ethyl 3-hydroxymethyltetrahydropyran-4-yl acetate was determined by integration of the triplet at d 3.92 (cis) and 3.96 (trans).

**cis and trans-4-(1,3-Dithiolan-2-ylmethyl)tetrahydro-4H-pyran-3-ylmethanol 144a,b**.To a solution of 3-hydroxylmethyl-tetrahydro-4H-pyran-4-ylacetic acid lactones **141a**,**b** (1.56 g, 10 mmol, cis:trans 7.2:1) in 30 cm3  of CH2Cl2 at -78 °C was added dropwise 12 cm3 of 1 M DIBALH in THF (12 cm3 , 12 mmol) over 25 min. After stirring 1 h at -78 °C, the mixture was allowed to warm to 0 °C, and quenched with 1 M HCl. The aqueous phase was extracted with CH2Cl2 (3 ´ 50 cm3  ). The combined extracts were washed with brine (30 cm3  ), dried over MgSO4, and concentrated to give 1.22 g (77.2% yield) of the crude lactols **143a**,**b**. TLC (SiO2, Et2O/MeOH 20:1, *Rf*= 0.55) indicated that the crude lactols were pure enough for the next step.

The above lactols **143a**,**b** were dissolved in 4 cm3  of 1,2-ethandithiol and dropwise 1 cm3  of concentrated HCl was added at 0 °C. After 1 h 3 cm3  of concentrated HCl was added. After stirring overnight, the mixture was partitioned between 30 cm3  of ice water and CH2Cl2 (3 ´ 50 cm3  ). The combined organic phase was washed with 5% NaHCO3 (30 cm3  ), brine (30 cm3  ), and dried over MgSO4. Concentration and chromatography (SiO2, AcOEt) provided cis alcohol **144a** (1.13 g, 48.3% yield for two steps, which was contaminated by trans alcohol **144b**): IR (neat) nmax/cm-13421, 2923, 2848, 1466, 1438, 1276, 1140, 1102, 1052, 1027, 1002, 845; NMR (500 MHz, CDCl3) dH 4.58 (t, *J* 7, 1 H), 4.07 (dd, *J* 2, 12, 1 H), 3.95 (m, 1 H), 3.77 (m, 1 H), 3.68 (m, 1 H), 3.49 (m, 2 H), 3.18-3.30 (m, 4 H), 2.25 (m, br, 1 H), 1.80-2.05 (m, 3 H), 1.70-1.75 (m,1 H), 1.47-1.64 (m, 2 H); NMR (125 MHz, CDCl3) dC 69.5, 67.9, 59.9, 51.0, 42.2, 39.8, 38.2, 38.1, 36.7, 28.8; HRMS (FAB), calcd for (M+1)+ C8H19O2S2 235.0826, found 235.0823.

**cis and trans-(3-Acetoxymethyl)tetrahydro-4H-pyran-4-ylethanal (146a,b)**.To a solution of 4-(1,3-dithiolan-2-ylmethyl)tetrahydro-4H-pyran-3-ylmethanol **144a**,**b** (2.34 g, 10 mmol) and pyridine (2.02 g, 20 mmol) in 15 cm3  of dry CH2Cl2 was added dropwise a solution of acetyl chloride (1.56 g, 20 mmol) in 5 cm3  dry CH2Cl2 at 0 °C. After stirring for 30 min at 0 °C and for 2 h at 25° C, the mixture was poured into 50 cm3  of 1 M HCl, and the aqueous phase was extracted with CH2Cl2 (3 ´ 40 cm3  ). The combined organic phase was washed with brine (20 cm3  ), dried over MgSO4, and concentrated under reduced pressure to give the acetates **145a**,**b** (2.72 g , 98.6%).

To a suspension of HgO (4.32 g, 20 mmol) in 30 cm3  THF and 6 cm3  H2O was added 7 cm3  of 48 % HBF4, followed by addition of a solution of the thioacetals **149a**,**b** in 4 cm3  of THF. After stirring for 5 min, the milk-like solution was diluted with 100 cm3  of CH2Cl2, filtered through Celite 545, and the column washed with CH2Cl2 (5 ´ 20 cm3  ). The filtrate was washed with 10% NaI (50 cm3  ), then with 5% KHCO3 (50 cm3  ), dried over MgSO4, and concentrated to give 1.66 g (84.0%) of the cis aldehyde **146a**, which was contaminated by its trans isomer **146b**. For **146a**: IR (neat) nmaxcm-12961, 2925, 2849, 1735, 1370, 1235, 1107, 1035; NMR (500 MHz, CDCl3) dH 9.84 (s, 1 H), 4.16-4.25 (m, 2 H), 3.88-3.97 (m, 2 H), 3.40-3.55 (m, 2 H), 2.56-2.63 (m, 1 H), 2.32-2.53 (m, 2 H), 2.05 (s, 3 H), 1.92-1.97 (m, 1 H), 1.50-1.55 (m, 2 H); NMR (125 MHz, CDCl3) dC 200.7, 170.9, 69.0, 67.6, 61.7, 46.8, 37.3, 30.8, 28.6, 20.9.

**Pentacyclic Condensation Products 148-151.** A solution of (+)-ferrocenylindoloazepine **14719** (2.300 g, 3.59 mmol) and cis 3-acetoxymethyltetrahedro-4H-pyran-4-ylethanal **146a** (0.680 g, 3.40 mmol) in 7 cm3  of dry benzene was heated at reflux for 36 h under Ar. The mixture was concentrated under reduced pressure and the residue dissolved in 10 cm3  of CH2Cl2 and 25 cm3  of dry ethanol. NaBH4 (0.129 g, 3.4 mmol) was added to reduce any unreacted aldehyde. After stirring for 15 min at room temperature, the mixture was poured into crushed ice, the aqueous phase was extracted with Et2O (3 ´ 50 cm3  ), and the combined dried (MgSO4) extracts were concentrated. Chromatography (SiO2, Et2O/pentane, 5:1) afforded the condensation products **148**, **149** (1.602 g, 54.3%) and **150**, **151** (0.265 g, 8.9%) with the structure of cis substituted tetrahydropyran ring, as well as a small portion of condensation products (0.262 g, 8.8% yield) with the structure of a trans substituted tetrahydropyran ring.

For the condensation products **148**, **149** (an inseparable mixture of two diastereoisomers in a 1:1 ratio as determined by 500 MHz 1H NMR with integration of the singlets at d 8.77 and 8.73): TLC *Rf* = 0.45 (SiO2, Et2O/pentane, 5:1, CAS blue); mp 106-108 °C (dec); [a]25D +411 (c 0.14, CHCl3); UV (EtOH) lmax/nm 220, 300, 330; NMR (500 MHz, CDCl3) dH 8.77 (s, 1 H, isomer 1), 8.73 (s, 1 H, isomer 2), 7.64-7.25 (m, 4 H), 7.36 (m, 3 H), 7.18-7.40 (m, 10 H), 7.14 (m, 4 H), 7.04 (m, 2 H), 6.82 (t, *J* 8, 1 H), 6.75 (d, *J* 8, 1 H), 6.71 (d, *J* 8, 1 H), 6.63 (t, *J* 7, 1 H), 6.52 (d, *J* 7, 1 H), 4.63 (m, 1 H), 4.52-4.60 (m, 2 H), 4.40-4.45 (m, 3 H), 4.37 (d, *J* 8, 2 H), 4.27 (s, 1 H, isomer 1), 4.23 (s, 1 H, isomer 2), 4.08 (t, *J* 11, 1 H), 3.80-3.95 (m, 16 H, include two 5 H singlets at 3.88 and 3.81), 3.73 (m, 1 H), 3.71 (s, 3 H), 3.68 (s, 3 H), 3.36 (s, 1 H, isomer 1), 3.32 (s, 1 H, isomer 2), 3.06 (t, *J* 7, 1 H), 2.99 (m, 4 H), 2.93 (m, 1 H), 2.85 (m, 2 H), 2.72 (m, 1 H), 2.01-2.20 (m, 8 H, include two 3 H singlet at 2.10 and 2.12), 1.88 (dd, *J* 3, 16, 1 H), 1.69-1.78 (m, 7 H), 0.84-1.63 (m, 14 H); NMR (125 MHz, CDCl3) dC 171.0, 170.7, 168.4, 168.4, 165.8, 164.3, 142.8, 142.5, 140.5, 140.4, 139.7, 139.7, 139.3, 139.3, 138.4, 138.3, 137.7, 137.1, 135.3, 135.2, 135.1, 134.9, 132.7, 132.5, 132.4, 132.2, 129.0, 128.8, 128.1, 128.1, 127.9, 127.8, 127.8, 127.5, 127.5, 127.2, 122.0, 121.9, 120.4, 120.3, 109.0, 108.8, 99.3, 99.0, 98.7, 98.4, 90.1, 75.2, 75.1, 71.9, 71.9, 71.6, 71.5, 69.7, 69.6, 69.2, 69.2, 69.1, 69.0, 68.9, 68.9, 68.8, 68.7, 68.5, 68.3, 64.8, 61.6, 60.6, 60.4, 55.7, 55.6, 52.7, 52.6, 51.4, 51.4, 50.8, 50.7, 50.5, 50.5, 48.0, 42.4, 40.9, 40.8, 40.2, 37.7, 35.7, 35.5, 34.9, 29.5, 26.6, 25.7, 21.1, 20.9, 20.0, 18.6, 13.9; HRMS (FAB), calcd for (M+1)+ C49H52FeN2O5P 835.2963, found 835.2990.

For the condensation products **150**,**151** (an inseparable mixture of two diastereoisomers in a 4:1 ratio as determined by 1H NMR with integration of the singlet at d 3.33 and 3.22): mp 85-98 °C (dec); [a]25D -43.1 (c 0.61, CDCl3); UV (EtOH) lmax/nm 216, 300, 330 nm; NMR (500 MHz, CDCl3) (of the main isomer) dH 8.77 (s, 1 H), 7.59 (m, 2 H), 7.37 (m, 3 H), 7.10 (m, 7 H), 6.86 (m, 1 H), 6.76 (d, *J* 8, 1 H), 4.49 (m, 3 H), 4.32 (m, 2 H), 3.96 (m, 8 H, include one 5 H singlet), 3.67 (s, 3 H), 3.22 (s, 1 H), 3.16 (m, 1 H), 3.08 (d, *J* 12, 1 H), 2.78 (m, 1 H), 2.36 (m, 1 H), 2.02-2.18 (m, 5 H, include one 3 H singlet at 2.11), 0.97-1.70 (m, 10 H); NMR (125 MHz, CDCl3) (of the main isomer) dC 170.5, 168.2, 163.4, 142.9, 137.9, 135.5, 135.3, 131.8, 131.7, 128.7, 127.6, 127.6, 127.4, 127.3, 127.3, 126.9, 121.9, 120.1, 108.9, 97.0, 96.8, 90.6, 75.0, 74.9, 71.4, 71.3, 69.4, 69.2, 69.1, 69.0, 68.6, 68.1, 64.1, 60.7, 55.1, 50.4, 49.6, 49.6, 41.6, 41.1, 41.1, 39.9, 35.4, 35.2, 26.3, 20.8, 18.3, 9.6; HRMS (FAB), calcd for (M+1)+ C49H52FeN2O5P 835.2963, found 835.2941.

**Pentacyclic N-Benzyl Amines 153** and **152**. A solution of compounds **148**, **149** (1.452 g, 1.77 mmol) in 25 cm3  of acetic acid was heated to 70 °C for 15 min. The cooled mixture was poured into crush ice and basified with 15% NH4OH in brine, the aqueous phase was extracted with CH2Cl2 (3 ´ 50 cm3  ). The combined extracts were dried over MgSO4 and concentrated under reduce pressure. Chromatography (SiO2, CH2Cl2/MeOH, 10:1) afforded the inseparable deferrocenylated amines.

To a stirred suspension of the above secondary amines, Et3N (0.234 mL, 2.32 mmol), and anhydrous powdered K2CO3 (0.6 g) in 5 cm3  of dry acetone was added benzyl bromide (0.217 g, 1.27 mmol). After stirring for 14 h at room temperature, the mixture was filtered and the solid was washed with CH2Cl2. The combined filtrate was concentrated and the residue was subjected to chromatography (SiO2, Et2O/hexane, 5:1) to afford 0.165 g (18.1%) of benzylate **153** contaminated by **152** and 0.166 g (18.2% yield) of benzylate **152** contaminated by **153**.

For **153**: TLC *Rf*= 0.59 (Et2O/hexane, 5:1, CAS blue); mp 73-76 °C (dec); UV (EtOH) lmax/nm 210,300, 330; IR (CH2Cl2) nmax/cm-1 3380, 3029, 2955, 2922, 2855, 2801, 1737, 1677, 1610, 1465, 1437, 1368, 1281, 1242, 1201, 1117, 1046, 1024; NMR (500 MHz, CDCl3) dH 8.89 (s, 1 H), 7.25-7.40 (m, 5 H), 7.10-7.18 (m, 2 H), 6.86 (m, 2 H), 4.35 (dd, *J* 4, 11, 1 H), 4.26 (m, 2 H), 3.89 (m, 2 H), 3.77 (s, 3 H), 3.67 (d, *J*  13, 1 H), 3.32 (s, 1 H), 3.15 (t, *J* 4, 12, 1 H), 3.02 (d, *J* 12, 1 H), 2.89 (dd, *J*  3, 9, 1 H), 2.69 (m, 2 H), 2.56 (m, 1 H), 2.02 (m, 4 H, include one 3 H singlet), 1.91 (d, *J* 12, 1 H), 1.72 (m, 1 H), 1.69 (dd, *J* 5, 12, 1 H), 1.36 (m, 2 H), 1.24 (m, 1 H); 13C NMR (125 MHz, CDCl3) dC 170.8, 168.5, 165.7, 142.8, 139.4, 137.4, 128.5, 128.4, 128.2, 127.8, 126.9, 121.9, 120.6, 109.3, 89.9, 69.1, 68.4, 67.3, 61.2, 58.0, 55.3, 50.9, 50.9, 50.5, 43.4, 40.1, 35.5, 34.7, 26.2, 20.8, 20.2; MS (CI), *m/z* 517 (M+1+, 100%), 486 (55), 457 (17), 425 (6), 383 (8), 357 (8), 332 (9), 302 (75), 227 (11), 171 (35), 107 (32), 91 (85); HRMS (FAB), calcd for (M+1)+ C31H37N2O5 517.2702, found 517.2797.

For **152**: TLC *Rf* = 0.57 (SiO2, Et2O/hexane, 5:1, CAS blue); mp 72-75 °C (dec); UV (EtOH) lmax/nm 210, 300, 330; IR (CH2Cl2) nmax/cm-1 3380, 3069, 3029, 2948, 2930, 2857, 2801, 1735, 1678, 1610, 1465, 1436, 1374, 1280, 1249, 1205, 1117, 1052, 1040; NMR (500 MHz, CDCl3) dH 8.90 (s, 1 H), 7.24-7.40 (m, 5 H), 7.17 (t, *J* 8, 1 H), 7.04 (d, *J* 8, 1 H), 6.85 (m, 2 H), 4.24 (m, 2 H), 4.09 (d, *J* 13, 1 H), 3.91 (d, *J* 11, 1 H), 3.84 (dd, *J*  3, 11, 1 H), 3.77 (s, 3 H), 3.65 (d, *J* 13, 1 H), 3.12 (m, 3 H), 2.91 (m, 2 H), 2.61 (m, 1 H), 2.53 (d, *J* 13, 1 H), 2.09 (m, 4 H, include one 3 H singlet), 1.69 (m, 3 H), 1.42 (m, 1 H), 1.28 (m, 1 H), 1.14 (m, 1 H); NMR (125 MHz, CDCL3) dC 170.9, 168.3, 164.8, 142.8, 138.8, 137.6, 128.6, 128.2, 127.8, 127.0, 121.9, 120.5, 109.2, 90.1, 69.1, 68.1, 68.1, 60.6, 57.9, 55.2, 50.7, 50.3, 42.3, 41.8, 35.3, 35.2, 26.3, 20.8, 19.6; MS (CI), *m/z* 517 (M+1+, 6%), 486 (2), 485 (3), 457 (2), 424 (1), 383 (1), 335 (1), 302 (2), 227 (5), 197 (1), 155 (3), 149 (2), 143 (27), 127 (4), 115 (8), 101 (81), 91 (15), 86 (96), 69 (14), 61 (100).

**Pentacyclic Tosylates 157** and **156**. To a solution of sodium (0.046 g, 2.00 mmol) in 10 cm3  absolute methanol was added a solution of the acetate **153** (0.176 g, 0.34 mmol, contaminated by **156**) in 2 cm3  of methanol. After stirring for 3 h, the mixture was added to 20 cm3  of saturated NH4Cl solution, and the aqueous phase extracted with CH2Cl2 (3 ´ 20 cm3  ). The combined dried (MgSO4) extracts were concentrated under reduced pressure to give the corresponnding alcohol **155**. To its stirred solution in 10 cm3  of CH2Cl2 containing Et3N (168 mL, 1.36 mmol) and 4-dimethylaminopyridine (3 mg) was added *p*-toluenesulfonic anhydride (167 mg, 0.51 mmol). After 2.5 h another portion of *p*-toluenesulfonic anhydride (167 mg, 0.51 mmol) was added and the mixture was stirred overnight. Concentration under reduced pressure and chromatography (SiO2, EtOAc/hexane, 1:1) to gave tosylate **157** (0.163 g, 76.2%) and tosylate **156** (0.012 g, 5.6 %) as a white foam.

The tosylate **156** was prepared according to the same procedure from acetate **152** ( 0.105 g, 0.20 mmol, contaminated by acetate **153**) to give 0.098 g (76.6%) of tosylate **156** and 0.013 g (10.1%) of tosylate **157** as a white foam.

For the tosylate **157**: TLC *Rf* = 0.55 (SiO2, EtOAc/hexane, 1:1, CAS blue); mp 86-88 °C (dec); [a]25D +170 (c 0.98, CHCl3); UV (EtOH) lmax/nm 210, 228, 300, 330; IR (CH2Cl2) nmax/cm-1 3377, 3061, 3031, 2956, 2918, 2858, 2791, 1734, 1677, 1610, 1465, 1437, 1363, 1281, 1248, 1189, 1176, 1116,1045, 960; NMR (500 MHz, CDCl3) dH 8.84 (s, 1 H), 7.70 (d, *J* 8, 2 H), 7.36 (m, 4 H), 7.30 (m, 1 H), 7.19 (m, 3 H), 7.14 ( d, *J* 12, 1 H), 6.90 (t, *J* 8, 1 H), 6.84 (d, *J* 8, 1 H,), 4.31 (t, *J* 10, 1 H), 4.15 (dd, *J* 3, 10, 1 H), 4.07 (d, *J* 10, 1 H), 3.84 (m, 2 H), 3.75 (s, 3 H), 3.55 (d, *J* 13, 1 H), 3.21 (s, 1 H), 3.11 (dd, *J* 3, 12, 1 H), 2.99 (d, *J* 12, 1 H), 2.85 (dd, *J* 3, 9, 1 H), 2.60 (m, 2 H), 2.52 (m, 1 H), 2.31 (s, 3 H), 1.99 (m, 1 H), 1.83 (m, 1 H), 1.71 (m, 1 H), 1.67 (dd, *J* 5, 12, 1 H), 1.30 (d, *J* 12, 1 H), 1.14-1.26 (m, 2 H); NMR (125 MHz, CDCl3) dC 168.2, 165.3, 144.5, 142.6, 139.1, 137.0, 132.7, 129.6, 128.4, 128.1, 127.8, 127.5, 126.8, 121.7, 120.7, 109.2, 89.5, 68.4, 68.1, 67.4, 67.2, 57.9, 55.1, 50.7, 50.3, 43.3, 39.9, 35.3, 35.2, 29.4, 26.1, 21.3, 20.1; MS (CI), *m/z* 629 (M+1+, 3%), 597 (2), 457 (4), 395 (4), 366 (10), 335 (2), 272 (2), 244 (2), 197 (3), 187 (17), 181 (11), 173 (8), 152 (10), 143 (3), 107 (12), 105 (8), 91 (100), 87 (14).

For the tosylate **156**: TLC *Rf* = 0.60 (SiO2, EtOAc/hexane, 1:1, CAS blue); mp 86-87 °C (dec); [a]25D +321 (c 0.77, CHCl3); UV (EtOH) lmax/nm 216, 230, 300, 330; IR (CH2Cl2) nmax/cm-1 3384, 3058, 3028, 2947, 2922, 2859, 2797, 1677, 1610, 1494, 1477, 1465, 1437, 1363, 1281, 1250, 1205, 1176, 1116, 1052, 961, 906; NMR (500 MHz, CDCl3) dH 8.95 (s, 1 H), 7.84 (d, *J* 8, 2 H), 7.35 (m, 4 H), 7.29 (m, 2 H), 7.16 (t, *J* 8, 1 H), 7.14 (d, *J* 8, 1 H), 7.02 (d, *J* 7, 1 H), 6.85 (m, 2 H), 4.25 (t, *J* 10, 1 H), 4.10 (dd, *J* 3, 9, 1 H), 4.01 (d, *J* 13, 1 H), 3.85 (d, *J* 12, 1 H), 3.75 (m, 4 H, includes one 3 H singlet), 3.68 (d, *J* 13, 1 H), 3.05 (m, 3 H), 2.93 (dd, *J* 3, 9, 1 H), 2.72 ( d, *J* 16, 1 H), 2.60 (m, 1 H), 2.47 (dd, *J* 3, 16 Hz, 1 H), 2.45 (s, 3 H), 2.06 (m, 1 H), 1.78 (d, *J* 10, 1 H), 1.68 (dd, *J* 5, 12, 1 H), 1.53 (m, 1 H), 1.38 (d, *J* 12, 1 H), 1.06 (m, 2 H); NMR (1`25 MHz, CDCl3) dC 168.16, 164.6, 144.4, 142.7, 138.7, 137.4, 133.0, 129.6, 129.4, 128.5, 128.1, 127.6, 126.9, 121.8, 120.5, 109.2, 89.8, 68.3, 68.0, 67.8, 66.8, 57.8, 55.1, 50.7, 50.4, 42.2, 41.7, 35.8, 35.0, 29.4, 26.3, 21.4, 19.3; MS (CI), *m/z* 629 (M+1+, 9%), 597 (2), 547 (1), 485 (3), 457 (11), 414 (5), 395 (3), 367 (35), 335 (5), 244 (16), 197 (11), 187 (100), 173 (31), 165 (16), 155 (16), 152 (51).

**Tetrahydropyranyl VLB Congener 20 and its Atropisomer 160a**. A solution of tosylate **157** (0.098 g, 0.16 mmol) and Et3N (32 mL, 0.23 mmol) in 5 cm3  of dry CH2Cl2 was cooled to 0 °C under Ar, and 28 mL (0.23 mmol) of *t*-butyl hypochlorite was added. After stirring at 0 °C for 5 min, the mixture was partitioned between 10 cm3  of H2O and 2 ´ 20 cm3  of CH2Cl2. The combined extracts were dried over MgSO4 and concentrated to give a crude chloroindolenine. The chloroindolenine and vindoline base (0.068 g, 0.15 mmol) were dissolved in 5 cm3  of dry acetone and 85% HBF4.Et2O (67 mL, 0.39 mmol) was added dropwise at 0 °C, followed after 10 min by addition of AgBF4 (0.121 g, 0.62 mmol) in 2 cm3  of dry acetone. After stirring at 0 °C for 40 min in the dark, the suspension was poured into 10 % NH4OH in brine (20 cm3  ), and the mixture was extracted with CH2Cl2 (3 ´ 20 cm3  ). The combined dried (MgSO4) extracts were concentrated under reduce pressure at room temperature. The residue was subjected to reduction in 5 cm3  of AcOH by addition of KBH4 (0.084 g, 1.56 mmol), in portions, over 20 min. The mixture was quenched with cold excess 30% NH4OH and extracted with CH2Cl2 (3 ´ 20 cm3  ). The combined extracts were dried over MgSO4. Concentration and chromatography (SiO2, EtOAc/MeOH, 10:1) afforded 0.110 g of coupling product **159** contaminated by vindoline, TLC *Rf* = 0.45 (SiO2, EtOAc/MeOH, 10:1, CAS brown). The crude coupling product **159** in 2 cm3  of dry acetonitrile was sealed in a 10 cm3  glass tube under Ar and heated at 110 °C for 2 days. The orange solution was concentrated and the residue was hydrogenated with 21 mg of 10% Pd / C in 3 cm3  of methanol under 1 atm of hydrogen for 4.5 h. After filtration through Celite 545 and rinsing with CH2Cl2 (5 ´ 10 cm3  ), the filtrate was washed with 10 % NH4OH in brine (10 cm3  ) and dried over MgSO4. Concentration and chromatography (eluting first with EtOAc/MeOH, 5:1, then with EtOAc/Et3N, 1:1) afforded the final product **20** (28.6 mg, 23.3% yield based on the used vindoline) and its more polar conformational isomer **160a (**1.6 mg, 1.3% yield based on the used vindoline).

The more polar conformational isomer **160a**, TLC (SiO2) *Rf* = 0.05 (EtOAc/MeOH, 2:1) and 0.25 (EtOAc/Et3N, 1:1, CAS brown), showed a complicated unelucidated 1H NMR spectrum, which after heating the compound in toluene for 7 h, completely changed to that of the less polar conformer **20**.

For the less polar conformer **20**: TLC (SiO2) *Rf* = 0.3 (EtOAc/MeOH, 2:1) and 0.6 (EtOAc/Et3N, 1:1, CAS brown); mp 208-211 °C (dec); [a]25D -7.6 (c 0.42, CH2Cl2); UV (EtOH) lmax/nm 216, 232, 262, 288; IR (CH2Cl2) nmax/cm-1 3467, 2935, 2878, 2848, 1738, 1615, 1595, 1501, 1458, 1432, 1370, 1332, 1227, 1153, 1104, 1077, 1038, 1109, 911; NMR (500 MHz, CDCl3) dH 9.76 (s, 1 H), 8.02 (s, 1 H), 7.49 (d, *J* 8, 1 H), 7.08-7.18 (m, 3 H), 6.57 (s, 1 H), 6.09 (s, 1 H), 5.85 (dd, *J* 4, 10, 1 H), 5.45 (s, 1 H), 5.29 (d, *J*  10, 1 H), 3.89 (dd, *J* 4, 11, 1 H), 3.80 (s, 3 H), 3.79 (s, 3 H), 3.74 (s, 1 H), 3.72 (d, *J* 12, 1 H), 3.63 (s, 3 H), 3.44-3.59 (m, 4 H), 3.12-3.42 (m, 7 H), 3.07 (d, *J* 16, 1 H), 2.72-2.83 (m, 2 H), 2.71 (s, 3 H), 2.61-2.67 (m, 2 H, includes one 1 H singlet), 2.31-2.50 (m, 2 H), 2.15 (m, 1 H), 2.10 (s, 3 H), 1.96-2.05 (m, 2 H), 1.72-1.87 (m, 3 H), 1.58-1.63 (m, 1 H), 1.34 (m, 1 H), 0.97 (d, *J* 11, 1 H), 0.93 (d, *J* 6, 1 H), 0.80 (t, *J* 7, 3 H), 0.44 (m, 1 H); NMR (125 MHz, CDCl3) dC 174.9, 171.7, 170.9, 158.1, 152.8, 135.1, 130.6, 130.0, 129.2, 128.7, 125.9, 124.5, 123.4, 122.9, 122.5, 119.0, 118.3, 110.5, 94.1, 83.3, 79.7, 76.5, 71.1, 68.5, 65.6, 57.3, 55.8, 55.4, 53.3, 52.4, 52.1, 51.2, 50.3, 44.5, 42.7, 39.1, 38.3, 35.4, 34.6, 31.6, 30.8, 29.7, 26.4, 21.1, 19.3, 13.7, 8.3; MS (CI), *m/z* 823 (M+1+, 8%), 791 (12), 777 (2), 762 (10), 663 (5), 611 (1), 583 (2), 554 (5), 469 (4), 366 (6), 295 (18), 282 (25), 271 (9), 237 (11), 314 (16), 166 (100), 152 (49); HRMS (FAB), calcd for (M+1)+ C47H59N4O9 823.4285, found 823.4278.

**Tetrahydropyranyl VLB Congener 19**.The product **19** was synthesized by the same procedure as the product **20** (22.3% yield based on the used vindoline) by using enantiomeric tosylate **156.** Its conformational isomer was not detected: TLC *Rf* = 0.05 (SiO2, EtOAc/MeOH, 5:2) and 0.55 (EtOAc/Et3N, 1:1, CAS brown); mp 228-230 °C (dec); [a]25D +44.5 (c 0.49, CH2Cl2); UV (EtOH) lmax/nm 216, 230, 262, 290; IR (CH2Cl2) nmax /cm-1 3468, 2945, 2915, 2877, 2846, 1740, 1616, 1505, 1457, 1435, 1371, 1331, 1226, 1145, 1101, 1041, 910; NMR (500 MHz, CDCl3) dH 9.77 (s, 1 H), 8.01 (s, 1 H), 7.54 (d, *J* 8, 1 H), 7.07-7.16 (m, 3 H), 6.60 (s, 1 H), 6.10 (s, 1 H), 5.85 (dd, *J* 4, 10, 1 H), 5.47 (s, 1 H), 5.29 (d, *J* 10, 1 H), 3.94 (m, 1 H), 3.80 (s, 3 H), 3.79 (s, 3 H), 3.74-3.77 (m, 1 H), 3.74 (s, 1 H), 3.58-3.64 (m, 4 H, includes one 3 H singlet at 3.62), 3.44-3.48 (m, 2 H), 3.37(dd, *J* 5, 17, 1 H), 3.23-3.32 (m, 3 H), 2.98-3.18 (m, 4 H), 2.82 (d, *J* 16, 1 H), 2.76 (dd, *J* 3, 11, 1 H), 2.74 (s, 3 H), 2.65 (s, 1 H), 2.55 (dt, *J* 3, 14, 2 H), 2.43 (m, 1 H), 2.15-2.21 (m, 1 H), 2.15 (s, 3 H), 1.93-1.98 (m, 1 H), 1.86-1.92 (m, 1 H), 1.74-1.83 (m, 3 H), 1.51-1.59 (m, 2 H), 1.30-1.36 (m, 1 H), 0.99-1.06 (m, 1 H), 0.82 (t, *J* 8 H, 3 H); NMR (125 MHz, CDCl3) dC 174.7, 171.6, 170.7, 158.0, 152.6, 134.7, 131.2, 129.9, 129.3, 124.3, 123.4, 122.8, 122.2, 120.7, 118.8, 118.2, 118.1, 116.9, 110.3, 94.0, 83.3, 79.5, 76.3, 70.4, 66.9, 65.6, 55.9, 55.7, 53.7, 53.1, 52.2, 52.0, 50.9, 50.3, 50.2, 46.8, 44.4, 42.6, 38.1, 35.7, 35.1, 33.0, 32.4, 30.7, 26.3, 24.5, 20.9, 8.3; MS (CI), *m/z* 823 (M+1+, 4%), 760 (3), 676 (3), 468 (3), 369 (2), 283 (4), 242 (4), 231 (8), 211 (9), 184 (6), 169 (10), 166 (32), 151 (12), 145 (28), 135 (31), 117 (100), 109 (14). HRMS (FAB), calcd for (M+1)+ C47H59N4O9 823.4285, found 823.4295.

**Alternative Syntheses of Congeners 19 and 20 and their C-14’, C-16’ Epimers through Racemic Intermediates 148 and 149.** A solution of N-benzylindoloazepine **61** (0.853 g, 2.55 mmol) and aldehydes **146a**,**b** (0.587 g 2.94 mmol, cis:trans 7.2:1) in 6 cm3  of dry toluene was heated at 110 °C for 17 h under Ar. The mixture was concentrated under reduced pressure and the residue was dissolved in 50 cm3  of methanol. NaBH4 (0.50 g) was added in one portion, with stirring to reduce the excess aldehyde. After stirring for 15 min at room temperature, the mixture was poured into 200 cm3  cold brine and the aqueous phase was extracted with CH2Cl2 (3 ´ 50 cm3  ). The combined organic phase was washed with brine (50 cm3  ) and dried over MgSO4. Concentration and chromatography (SiO2, EtOAc/hexane, 1:1) afforded 0.925 g (70.3%) of an inseparable mixture of racemic 4’, 14-pref product **152** and 4’,14-parf product **153** in a 1:1 ratio as well as some 3’, 4’-trans products. For the compounds **152** and **153**: TLC *Rf* = 0.65 (SiO2, EtOAc/hexane 1:1, CAS blue).

To a solution of the above mixture of **152** and **153** (0.925 g, 1.79 mmol) in 25 cm3  of absolute methanol, was added a solution of MeONa (5.37 mmol) in 30 cm3  of methanol. After stirring at room temperature for 5 h, 50 cm3  of saturated NH4Cl solution was added. The aqueous phase was extracted with CH2Cl2 (3 ´ 50 cm3  ). The combined dried (MgSO4) extracts were concentrated and the residue was subjected to chromatography (SiO2, EtOAc) to give 14, 4’-parf alcohol **155** (0.410 g, 48.3%), TLC *Rf* = 0.6 (SiO2, EtOAc, CAS blue), and 14, 4’-pref alcohol **154** (0.383 g, 45.2%), TLC *Rf* = 0.4 (SiO2, EtOAc, CAS blue).

To a solution of 14, 4’-parf alcohol **155** (0.410 g, 0.86 mmol), Et3N (359 mL, 2.60 mmol), and 4-dimethylaminopyridine (10 mg) in 20 cm3  of dry CH2Cl2 was added dropwise a solution of *p*-toluenesulfonic anhydride (0.423 g, 1.29 mmol) in 2 cm3  dry CH2Cl2 over 10 min. After stirring at room temperature for 5 h, another portion of *p*-toluenesulfonic anhydride (0.263 g, 0.81 mmol) was added. The mixture was stirred overnight. Evaporation of the solvent under reduce pressure and chromatography (EtOAc/hexane, 1:1) gave the racemic 14, 4’-parf tosylate **157** (0.465 g, 85.5% yield) as white foam. The racemic 14, 4’-pref tosylate **156** (0.412g, 81.1%) was prepared by the same procedure from 14, 4’-pref alcohol **154** (0.383g, 0.81 mmol).

For the racemic 14, 4’-parf tosylate **157**: TLC *Rf* = 0.55 (SiO2, EtOAc/hexane, 1:1, CAS blue); mp 85-87 °C (dec); UV (EtOH) lmax/nm 210, 228, 300, 330; IR (CH2Cl2) nmax/cm-1 3377, 3061, 3031, 2956, 2918, 2858, 2791, 1734, 1677, 1610, 1465, 1437, 1363, 1281, 1248, 1189, 1176, 1116,1045, 960; NMR (500 MHz, CDCl3) dH 8.84 (s, 1 H), 7.70 (d, *J* 8, 2 H), 7.36 (m, 4 H), 7.30 (m, 1 H), 7.19 (m, 3 H), 7.14 (d, *J* 12, 1 H), 6.90 (t, *J*  8, 1 H), 6.84 (d, *J* 8, 1 H,), 4.31 (t, *J* 10, 1 H), 4.15 (dd, *J* 3, 10, 1 H), 4.07 (d, *J* 10, 1 H), 3.84 (m, 2 H), 3.75 (s, 3 H), 3.55 (d, *J* 13, 1 H), 3.21 (s, 1 H), 3.11 (dd, *J* 3, 12, 1 H), 2.99 (d, *J* 12, 1 H), 2.85 (dd, *J* 3, 9, 1 H), 2.60 (m, 2 H), 2.52 (m, 1 H), 2.31 (s, 3 H), 1.99 (m, 1 H), 1.83 (m, 1 H), 1.71 (m, 1 H), 1.67 (dd, *J* 5, 12, 1 H), 1.30 (d, *J* 12, 1 H), 1.14-1.26 (m, 2 H); NMR (125 MHz, CDCl3) dC 168.2, 165.2, 144.5, 142.6, 139.1, 137.0, 132.7, 129.6, 128.4, 128.1, 127.8, 127.5, 126.8, 121.7, 120.7, 109.1, 89.5, 68.4, 68.1, 67.4, 67.2, 57.9, 55.1, 50.7, 50.2, 43.3, 39.9, 35.3, 35.2, 29.4, 26.1, 21.3, 20.1; MS (CI), *m/z* 629 (M+1+, 3%), 597 (1), 547 (1), 457 (3), 395 (1), 366 (10), 335 (1), 272 (1), 244 (1), 197 (2), 187 (17), 181 (11), 173 (6), 152 (10), 143 (2), 107 (12), 105 (8), 91 (100), 87 (14).

For the racemic 14, 4’-pref tosylate **156**, TLC *Rf* = 0.60 (SiO2, EtOAc/hexane, 1:1, CAS blue); mp 84-87 °C (dec); UV (EtOH) lmax/nm 216, 230, 300, 330; IR (CH2Cl2) nmax/cm-1 3384, 3058, 3028, 2947, 2922, 2859, 2797, 1677, 1610, 1494, 1477, 1465, 1437, 1363, 1281, 1250, 1205, 1176, 1116, 1052, 961, 906; NMR (500 MHz, CDCl3) dC 8.95 (s, 1 H), 7.84 (d, *J* 8, 2 H), 7.35 (m, 4 H), 7.29 (m, 2 H), 7.16 (t, *J* 8, 1 H), 7.14 (d, *J* 8, 1 H), 7.02 (d, *J* 7, 1 H), 6.85 (m, 2 H), 4.25 (t, *J* 10, 1 H), 4.10 (dd, *J*  3, 9, 1 H), 4.01 (d, *J* 13, 1 H), 3.85(d, *J* 12, 1H), 3.75 (m, 4 H, includes one 3 H singlet), 3.68 (d, *J* 13, 1 H), 3.05 (m, 3 H), 2.93 (dd, *J* 3, 9, 1 H), 2.72 (d, *J* 16, 1 H), 2.60 (m, 1 H), 2.47 (dd, *J* 3, 16, 1 H), 2.45 (s, 3 H), 2.06 (m, 1 H), 1.78 (d, *J* 9, 1 H), 1.68 (dd, *J* 5, 12, 1 H), 1.53 (m, 1 H), 1.38 (d, J 11, 1 H), 1.06 (m, 2 H); NMR (125 MHz, CDCl3) d 168.2, 164.6, 144.4, 142.7, 138.7, 137.4, 133.0, 129.6, 129.4, 128.5, 128.1, 127.6, 126.9, 121.8, 120.5, 109.2, 89.8, 68.3, 68.0, 67.8, 66.8, 57.8, 55.1, 50.7, 50.4, 42.2, 41.7, 35.8, 35.0, 29.4, 26.3, 21.4, 19.3; MS (CI), *m/z* 629 (M+1+, 6%), 548 (3), 476 (1), 457 (27), 407 (2), 385 (1), 367 (77), 325 (2), 244 (17), 187 (100), 173 (66).

**Tetrahydropyrano Congeners 20 and 14’,15’,16’,20’-epi-20**.To a solution of racemic 14, 4’-parf tosylate **157** (0.220 g, 0.35 mmol) and Et3N (75 mL, 0.52 mmol) in 15 cm3  of dry CH2Cl2 was added dropwise *t*-butyl hypochlorite (62 uL, 0.52 mmol) at 0 °C. After five min the reaction was quenched with 20 cm3  of H2O and the aqueous phase was extracted with CH2Cl2 (3 ´ 20 cm3  ). The combined dried (MgSO4) extracts were concentrated under reduced pressure to give crude chloroindolenine products. The chloroindolenine product and vindoline base (0.152 g, 0.33 mmol) were dissolved in 15 cm3  of of dry acetone, and 85% HBF4.Et2O (62 mL, 0.53 mmol) was added dropwise at 0 °C. After stirring for 10 min, AgBF4 (0.272g, 1.40 mmol) in 4 cm3  of dry acetone was added in one portion, with shielding from light. After 40 min in the dark at 0 °C the reaction was quenched with 20 cm3  of 10 % NH4OH in brine. The aqueous phase was extracted with CH2Cl2 (3 ´ 30 cm3  ) and the combined dried organic phase was concentrated under reduced pressure. The residue was dissolved in 10 cm3  of acetic acid and KBH4 (0.189 g, 3.50 mmol) was added in portions over 20 min. The reaction mixture was poured into crushed ice, adjusted to pH 10 with 30% NH4OH and extracted with CH2Cl2 (2 ´ 40 cm3  ). The combined dried (MgSO4) extracts were concentrated under reduced pressure. Chromatography (SiO2, EtOAc/MeOH, 10:1) afforded 0.255 g of an inseparable mixture of coupling products **159** and **14’, 15’, 16’, 20’-epi-159**.

In a degassed sealed glass tube, a solution of the above coupling products in 3 cm3  of dry acetonitrile was heated to 110 °C for 3 days. After concentration of the orange solution, the residue was dissolved in 5 cm3  of dry methanol and hydrogenated with 32 mg of 10% Pd / C under 1 atm of hydrogen for 4 h. After filtration through Celite 545 and washing with CH2Cl2 (5 ´ 10 cm3  ), the combined filtrate was washed with 10% NH4OH in brine (10 cm3  ), dried over MgSO4, and concentrated. The residue was chromatographed (SiO2, EtOAc/MeOH, 2:1) to afford 0.056 g (20.7% yield based on the used vindoline ) of the final product **20** (which matched the characterized sample prepared from single enantiomeric tosylate **157** in mp, rotation, and spectroscopic data**)** and 0.043 g (15.9 % yield based on the used vindoline) of **14’, 15’, 16’, 20’-epi-20**.

For product **14’, 15’, 16’, 20’-epi-20**: TLC *Rf* = 0.6 (SiO2, EtOAc/MeOH, 2:1, CAS rust); mp 217-220 °C (dec); [a]25D -98.1 (c 0.39, CH2Cl2); UV (EtOH) lmax/nm 214, 234, 260, 292; IR (CH2Cl2) nmax/cm-1 3455, 2933, 2886, 2847, 1738, 1615, 1498, 1458, 1432, 1370, 1333, 1225, 1103, 1039, 1008; NMR (500 MHz, CDCl3) dH 9.51 (s, 1 H), 8.06 (s, 1 H), 7.50 (d, *J* 8, 1 H), 7.18 (m, 2 H), 7.10 (t, *J* 7, 1 H), 6.73 (s, 1 H), 6.14 (s, 1 H), 5.79 (dd, *J* 4, 10, 1 H), 5.46 (s, 1 H), 5.25 (d, *J* 10, 1 H), 3.88 (dd, *J* 4, 11, 1 H), 3.81 (s, 3 H), 3.80 (s, 3 H), 3.78 (s, 1 H), 3.67-3.78 (m, 2 H), 3.57 (s, 3 H), 3.48 (dd, *J* 2, 12, 2 H), 3.39 (dd, *J* 5, 16, 1 H), 3.07-3.32 (m, 7 H), 2.72-2.82 (m, 2 H), 2.73 (s, 3 H), 2.67 (m, 1 H), 2.36-2.44 (m, 2 H), 2.32 (d, *J* 14, 1 H), 2.16 (m, 1 H), 2.06 (s, 3 H), 1.90-2.06 (m, 2 H), 1.72 (m, 1 H), 1.54 (m, 3 H), 1.12 (m, 1 H), 0.96 (m, 1 H), 0.76 (m, 1 H), 0.42 (t, *J* 7, 3 H); NMR (125 MHz, CDCl3) dC 174.9, 171.8, 170.6, 158.2, 153.2, 135.0, 130.9, 130.0, 129.1, 124.0, 123.7, 123.6, 122.3, 120.9, 118.9, 118.4, 117.2, 110.2, 94.1, 83.4, 79.6, 77.2, 75.8, 71.1, 68.6, 67.0, 56.6, 55.7, 55.6, 53.4, 52.3, 52.2, 51.6, 51.0, 50.6, 44.6, 43.3, 42.9, 39.6, 38.3, 35.4, 34.6, 32.1, 30.8, 29.6, 29.4, 26.2, 21.0, 19.3, 8.6; MS (CI), *m/z* 823 (M+1+, 7%), 721 (3), 599 (4), 592 (6), 518 (2), 469 (3), 452 (4), 366 (5), 283 (3), 229 (5), 166 (8), 121 (9), 99 (10), 87 (19), 82 (19), 61 (100), HRMS (FAB), calcd for (M+1)+ C47H59N4O9 823.4285, found 823.4301.

**Tetrahydropyrano Congeners 19 and 14’, 15’, 16’, 20’-epi-19**. The products **19** and **14’, 15’, 16’, 20’-epi-19** were synthesized according to the preceding procedure using racemic 14, 4’-pref tosylate **156** (0.379 g, 0.60 mmol) by chlorination with t-butyl hypochlorite, coupling with vindoline, reduction, cyclization and debenzylation to give 0.098 g (21.4% yield based on the used vindoline) of **19** (which matched the characterized sample prepared from single enantiomeric tosylate **156** in mp, rotation, and spectroscopic data**)** and 0.104 g (22.7 % yield based on the used vindoline) of the product **14’, 15’, 16’, 20’-epi-19**.

For the product **14’, 15’, 16’, 20’-epi-19**: TLC *Rf* = 0.25 (SiO2, EtOAc/MeOH, 5:2) and 0.70 (EtOAc/Et3N, 1:1, CAS rust); mp 232-235 °C (dec); [a]25D -137.1 (c 0.34, CH2Cl2); UV (EtOH) lmax/nm 216, 228, 258, 298; IR (CH2Cl2) nmax/cm-1 3460, 2947, 2877, 2852, 2808, 1734, 1615, 1498, 1457, 1432, 1371, 1333, 1226, 1041, 910; NMR (500 MHz, CDCl3) dH 8.07 (s, 1 H), 7.52 (d, *J* 10, 1 H), 7.05-7.25 (m, 3 H), 6.70 (s, 1 H), 6.14 (s, 1 H), 5.80 (dd, *J* 5, 10, 1 H), 5.46 (s, 1 H), 5.24 (d, *J* 10, 1 H), 3.94 (m, 1 H), 3.75-3.85 (m, 8 H, includes two 3 H singlets at 3.80 and 3.82), 3.65 (dd, *J* 4, 12, 2 H), 3.57 (s, 3 H), 3.43-3.56 (m, br, 2 H), 3.26-3.42 (m, 4 H), 2.76-3.20 (m, br, 3 H), 2.72-2.82 (m, 5 H, includes one 3 H singlet at 2.73), 2.61 (d, *J* 11, 1 H), 2.36-2.47 (m, 3 H, includes one 1 H singlet at 2.43), 2.14-2.19 (m, 1 H), 2.07 (s, 3 H), 1.96 (s, 1 H), 1.88-1.95 (m, 2 H), 1.67-1.76 (m, br, 1 H), 1.55-1.65 (m, 2 H), 1.23-1.38 (m, 1 H), 1.14 (t, *J* 8, 1 H), 1.06 (m, 1 H), 0.39 (t, *J* 7, 3 H); NMR (125 MHz, CDCl3) dC 174.3, 171.6, 170.6, 158.0, 153.2, 134.8, 131.2, 129.6, 128.6, 124.0, 123.8, 123.4, 122.5, 119.7, 119.2, 118.1, 118.0, 115.4, 110.2, 94.2, 83.4, 79.4, 75.9, 69.8, 66.8, 66.6, 55.8, 55.6, 53.3, 53.2, 52.3, 52.1, 50.8, 50.3, 46.6, 44.6, 42.6, 38.3, 34.0, 32.7, 32.5, 30.7, 29.5, 25.8, 23.0, 20.9, 20.9, 14.6, 8.2; MS (CI), *m/z* 823 (M+1+, 3%), 713 (1), 588 (3), 513 (2), 422 (1), 362 (1), 317 (1), 266 (1), 136 (37), 122 (41), 108 (18), 101 (23), 88 (10), 61 (100); HRMS (FAB), calcd for (M+1)+ C47H59N4O9 823.4285, found 823.4280.

***For Scheme 10: 20'-Methyl-20’-deethylvinblastine (27), its Atropisomer (162a)******and 20'-Methyl-20’-deethyl-20’- epi-vincovaline (161) and its Atropisomer (162b).***

**2-(*S*)-2-Methyl-2-hydroxyhex-5-enol**. 2-(*R*)-methylglycidol from Aldrich Chemical Co. was distilled prior to use (bp 60 oC / 14 mm Hg). A mixture of 5.00 g of *R*-2-methylglycidol (0.0567 mol, 1.0 equiv.), 1.09 g of copper iodide (0.00567 mol, 0.10 equiv.), and 150 cm3  of dry tetrahydrofuran were stirred at -60 oC (acetonitrile / dry ice bath) under nitrogen for 30 min. Then allylmagnesium chloride, 2.0 M in tetrahydrofuran (0.116 mol, 2.05 equiv.) was added dropwise over an hour.

After stirring for 2 h at -40 oC, the reaction mixture was left overnight at -20 oC,

and then poured over 1.2 M HCl and crushed ice. Extraction with with dichloromethane and chromatography on silica gel with ether/pentane (1:1) gave a yellow oil (6.293 g) and 0.430 g of the starting epoxide. The olefinic diol was distilled at 105-109 oC / 9mm Hg to yield the 4.901 g of product as a colorless oil (66%). TLC (SiO2, Ether) *Rf* = 0.58 (blue, PPMA); IR (neat, NaCl) max/cm-1 3368-3390, 2977, 2938, 2876, 1641, 1461, 1379, 1268, 1219, 1176, 1132, 1052, 996, 910, 789, 735, 665; NMR (270 MHz, CDCl3) H1.17 (s, 3 H), 1.72-1.54 (m, 2 H), 2.18-1.99 (m, 2 H), 2.67 (br.s, 2 H), 3.75-3.33 (m, 2 H), 5.16-4.94 (m, 2 H), 5.92-5.77 (m, 1 H); NMR (67.9 MHz, CDCl3) C 23.3, 28.0, 37.8, 69.8, 72.9, 114.5, 138.7; MS (EI) *m/z*  132 (0.1%), 131 (M+1+, 2.2), 116 (0.2), 115 (4), 113 (7), 112 (2), 100 (7), 99 (100), 95 (51), 81 (11), 75 (64), 69 (8), 58 (21), 57 (42), 55 (16).

**5-(*S*)-5-Methyl-5-hydroxy-6-*p-*tosyloxyhexene**. To a stirring solution of 4.00 g of the above olefinic diol (0.0307 mol, 1.0 equiv.) in 100 cm3  of dry dichloromethane was added, sequentially, 6.42 cm3  of dry triethylamine (0.0461 mol, 1.5 equiv.), and 0.751 g DMAP (0.00614 mol, 0.20 equiv.) and 5.86 g of *p*-toluenesulfonyl chloride (0.046 mol, 1.0 equiv.). After stirring the mixture overnight, some starting material was still seen by TLC in the crude reaction mixture, so an additional 2.928 g of tosylchloride and 2.14 cm3  of triethyl amine were added. After 3 h the reaction mixture was washed with 2  100 cm3  of saturated sodium bicarbonate and 100 cm3  of brine. The mixture was dried over magnesium sulfate and concentrated to 10.252 g. Chromatography on 100 g of silica gel with ether/pentane (1:4) gave 7.684 g of product (88% yield ).

TLC (SiO2, ether/pentane, 1: 4 ) *Rf* = 0.10 (blue, PPMA); IR (neat, NaCl) max/cm-1 3536-3309, 3075, 2979, 2944, 2928, 1641, 1599, 1454, 1400, 1359, 1190, 1177, 1097, 1020, 982, 916, 844, 815, 790, 668; NMR (270 MHz, CDCl3) H 1.18 (s, 3 H), 1.66-1.48 (m, 2 H), 1.87 (s, 1 H), 2.10-2.00 (m, 2 H), 2.46 (s, 3 H), 3.85 (s, 2 H), 5.04-4.93 (m, 2 H), 5.85-5.70 (m, 1 H), 7.36 (d, *J* 8, 2 H), 7.80 (d, *J* 8, 2 H); NMR (67.9 MHz, CDCl3) C 22.0, 23.9, 28.0, 37.9, 71.7, 76.5, 115.3, 128.4, 130.3, 133.1, 138.5, 145.5; MS (EI) *m/z*  286 (4%), 285 (M+1+, 24), 279 (2), 269 (3), 268 (4), 267 (26), 263 (5), 261 (3), 254 (7), 229 (16), 225 (3), 185 (4), 173 (6), 156 (8), 155 (46), 139 (3), 113 (9), 107 (4), 100 (5), 99 (79), 97 (5), 95 (100), 94 (30), 91 (58), 79 (11), 65 (28).

**5-(*S*)-5-Methyl-5-trimethylsilyloxy-6-*p-*tosyloxyhexene**. To 2.00 g of the above tosylolefinic alcohol (0.00703 mol, 1.0 equiv.) at 0 oC in 100 cm3  of dry tetrahydrofuran was added 1.838 cm3  of diisopropylethylamine (0.01055 mol, 1.5 equiv.) and 2.345 g of trimethylsilyl trifluoromethane sulphonate (0.01055 mol, 1.5 equiv.). After thirty min. the crude reaction mixture was poured into 75 cm3  of saturated sodium bicarbonate and ether. The organic layer was washed with 75 cm3  of satd. sodium bicarbonate and one 75 cm3  portion of brine. After drying over magnesium sulfate and concentrating to dryness, a crude oil was purified by column chromatography on 100 g of silica gel, eluted with ether/pentane (1: 4), to give 3.965 g of the product as a light yellow oil (86%). Some starting material was also recovered (0.350 g). TLC (SiO2, ether/pentane 1:1) *Rf* = 0.53 (blue, PPMA); IR (neat, NaCl) max/cm-1 3076, 3068, 2977, 2958, 1642, 1599, 1455, 1366, 1291, 1252, 1211, 1190, 1178, 1098, 1042, 1021, 987, 911, 845, 815, 794, 755, 739; NMR (270 MHz, CDCl3) 0.20 (m, 9 H), 1.23 (s, 3 H), 1.62-1.43 (m, 2 H), 2.08-1.85 (m, 2 H), 2.47 (s, 3 H), 3.77 (q, *J* 12, 2 H), 5.02-4.90 (m, 2 H), 5.83-5.65(m, 1 H), 7.37 (d, *J* 8, 2 H), 7.81 (d, *J* 8, 2 H); NMR (67.9 MHz, CDCl3) C2.1, 2.3, 21.5, 24.8, 27.6, 38.6, 74.1, 75.2, 114.3, 127.9, 129.7, 133.2, 138.3, 144.7; MS (EI) *m/z*  357 (M+1+, 0.4%), 342 (0.8), 341 (4), 319 (6), 318 (11), 317 (47), 301 (18), 245 (6), 230 (9), 229 (75), 172 (13), 171 (100), 165 (6), 155 (12), 149 (7), 143 (7), 129 (7), 95 (34), 94 (16), 91 (34), 75 (22.5), 73 (71), 64 (9).

**5-(*S*)-5-Methyl-5-*tert*-butyldimethylsilyloxy-6-*p-*tosyloxyhexene**. To 7.00 g of the above tosylolefinic alcohol ( 0.0246 mol, 1.0 equiv.) in 100 cm3  of dry dichloromethane was added sequentially 5.15 cm3  of dry triethylamine (0.0369 mol, 1.50 equiv.), 0.60 g DMAP (0.0049 mol, 0.20 equiv.), and 8.48 cm3  of TBDSOTf (0.0369 mol, 1.50 equiv.), (TBDMSOTf, E.J. Corey TL **1981**, *22*(36), 3455). After stirring at room temperature for 15 h, the mixture was washed with 2  100 cm3  of satd. sodium bicarbonate and 100 cm3  of brine. After drying over magnesium sulfate and concentration to 11.763 g, the product was purified by column chromatography on 80 g of silica gel, eluted with ether/pentane (1:11) to provide 9.309 g (95%) of the title product. TLC (SiO2, ether/hexane 1:4) *Rf* = 0.75 (blue, PPMA); IR (neat, NaCl) max/cm-1 3078, 2955, 2930, 2896, 2887, 2857, 1642, 1599, 1472, 1463, 1403, 1368, 1308, 1291, 1255, 1211, 1190, 1178.22, 1157, 1121, 1098, 1044, 1021, 987, 837, 814, 793, 776, 705, 686, 668; NMR (270 MHz, CDCl3) C0.21-(-0.04) (m, 6 H), 0.99-0.70 (m, 9 H), 1.22 (s, 3 H), 1.63-1.43 (m, 2 H), 2.16-1.88 (m, 2 H), 2.48 (s, 3 H), 3.79 (q, *J* 13, 2 H), 5.03-4.92 (m, 2 H), 5.83-5.68 (m, 1 H), 7.38 (d, *J* 8, 2 H), 7.81 (d, *J* 8, 2 H); NMR (67.9 MHz, CDCl3) -2.3, 18.1, 21.6, 24.9, 25.7, 27.6, 38.9, 73.8, 75.0, 114.4, 127.9, 129.8, 133.0, 138.4, 144.7; MS (EI) *m/z*  399 (M+1+, 4%), 395 (0.4), 393 (1.0), 383 (0.6), 379 (0.7), 377 (0.9), 361 (1), 359 (1), 344 (0.8), 343 (4), 341 (14), 337 (5), 335 (11), 267 (2), 230 (3), 229 (23), 227 (22), 221 (8), 213 (8), 189 (1), 185 (3), 133 (2), 115 (3), 97 (9), 95 (100), 91 (10), 73 (7), 57 (4).

**4-(*S*)-4-Methyl-4-trimethylsilyloxy-5-tosyloxypentanal (167)**. A solution of 1.997 g of 5-(*S*)-5-methyl-5-trimethylsiloxy-6-*p-*tosyloxyhexene in 100 cm3  of dry dichloromethane and a few drops of Sudan (1% indichloromethane), at -78 oC, was subjected to a slow stream of ozone. The reaction mixture was fully saturated with ozone when the red indicator turned blue; approx. 10 min. Nitrogen was then bubbled through the reaction mixture until the blue colored solution turned colorless (30 min.). Triphenylphosphine (4.414 g, 0.0168 mol, 3.0 equiv.) was added to the cooled (-78 oC) reaction mixture, which was allowed to come to room temperature. This solution was stirred overnight at room temperature. Concentration at 40 oC and chromatography on 100 g of silica gel, eluting with ether/pentane (1:8) to remove triphenylphosphine, then ether/pentane (1:1) gave 1.629 g (81%) of product. TLC (SiO2, ether/pentane 1:1) *Rf =* 0.87 (blue, PPMA); IR (neat, NaCl) max/cm-1 2958, 2929, 2899, 2823, 2726, 1724, 1599, 1456, 1363, 1252, 1190, 1177, 1053, 1021, 982, 842, 815; NMR (270 MHz, CDCl3) H0.16-(-0.02) (m, 9 H), 1.24 (s, 3 H), 1.87-1.69 (m, 2 H), 2.42-2.32 (m, 2 H), 2.46 (s, 3 H), 3.76 (q, *J* 13, 2 H), 7.36 (d, *J* 8, 2 H), 7.79 (d, *J* 8, 2 H), 9.69 (t, *J* 2, 3 H); NMR (67.9 MHz, CDCl3) 2.1, 21.4, 24.6, 31.8, 38.11, 73.5, 74.7, 127.8, 129.8, 132.9, 144.9, 201.4; MS (EI) *m/z*  369 (M+1+, 4%), 358 (2), 317 (2), 302 (4), 301 (19), 248 (3), 245 (5), 231 (6), 230 (9), 229 (51), 228 (10), 187 (4), 175 (5), 174 (14), 173 (100), 171 (30), 165 (3), 157 (3), 155 (20), 149 (9), 143 (6), 131 (6), 130 (5), 129 (11), 115 (5), 101 (3), 99 (5), 97 (48), 91 (48), 83 (19), 75 (30), 73 (96), 68 (14), 65 (15), 55 (16).

**4-(*S*)-4-Methyl-4-*tert-*butyldimethylsilyloxy-5-tosyloxypentanal (168)**. A solution of 2.00 g of 5-(*S*)-5-methyl-5-*tert*-butyldimethylsilyloxy-6-*p-*tosyloxyhexene and a few drops of Sudan (1% indichloromethane)in 100 cm3  of dry dichloromethane, at -78 oC, was ozonised by addition of ozone at a moderate rate. The reaction mixture was fully saturated with ozone when the red indicator turned blue. Nitrogen was then bubbled through the reaction mixture until the blue colored solution turned colorless. The reaction mixture was allowed to come up to room temperature and 1.64 g of zinc dust (0.0251 mol, 5.0 equiv.) was added along with 14.36 cm3  of glacial acetic acid (0.2509 mol, 50.0 equiv.). This heterogeneous mixture was stirred overnight at room temperature and then filtered through Celite. The reaction mixture was washed with 3  100 cm3  of saturated sodium bicarbonate (addition done very slowly) and 100 cm3  of brine. The collected dichloromethane extracts were dried over magnesium sulfate and concentrated to 2.355 g. Chromatography on 60 g of silica gel, eluted with ether/pentane (1:5) gave 1.484 g (74%) of the title product. TLC (SiO2, ether/hexane 1:1) *Rf =* 0.63 (blue, PPMA); IR (neat, NaCl) max/cm-1 2956, 2930, 2895, 2857, 2723, 1726, 1598, 1472, 1464, 1363, 1308, 1291, 1256, 1191, 1178, 1144, 1098, 1070, 1051, 1020, 1006, 984, 837, 776.55, 667; NMR (270 MHz, CDCl3) H0.07 (d, *J* 3, 6 H), 0.84-0.82 (br.s, 9 H), 1.24 (s, 3 H), 1.89-1.72 (m, 2 H), 2.54-2.40 (m, 5 H), 3.78 (d, *J* 3 Hz, 2 H), 7.38 (d, *J* 8, 2 H), 7.81 (d, *J* 8, 2 H), 9.74 (t, *J* 1, 1 H); NMR (67.9 MHz, CDCl3) mixture of aldehyde and enol forms: -2.3, 14.0, 15.2, 18.1, 21.6, 24.9, 25.7, 28.0, 31.7, 34.3, 38.3, 53.4, 65.8, 73.2, 74.6, 127.9, 129.9, 132.8, 145.0, 201.6; mass spectrum EI, *m/z*  402 (0.7), 401 (M+1+, 3%), 383 (0.9), 345 (1), 344 (2), 343 (9), 325 (2), 287 (2), 271 (2), 269 (10), 247 (8), 231 (10), 230 (18), 229 (100), 215 (33), 185 (5), 171 (54), 155 (5), 149 (5), 131 (4), 97 (70), 91 (20), 84 (3).

**4,2'-PREF and 4,2’-PARF Methyl 3-Benzyl-1,2,3,3a,4,5-hexahydro-4[2-(*S*)-(trimethylsilyloxy)-2-(tosyloxymethyl)propyl]-7H-pyrrolo(2,3-d)carbazole-6-carboxylate** **(169a/b)**. A solution of N-benzylindoloazepine **61**  (0.849 g, 2.54 mM, 1.0 equiv.) and 1.00 g (2.79 mM, 1.1 equiv.) of aldehyde **167** in 50 cm3  of dry toluene was heated at reflux for 15 h. Some azepine still remained, but no aldehyde could then be detected by TLC. Concentration and chromatography on 100 g of silica gel with ethyl ether/pentane 1:4, gave 0.977 g (57%) of the title products and a light yellow foam (0.1962 g) which contained mostly the desired product and unreacted indoloazepine. For the diastereomeric mixture: TLC (SiO2, ether/pentane 1:1) *Rf =* 0.42 (blue with yellow center, CAS); UV (EtOH) max/nm 300, 271, 203, 195; IR (KBr) max/cm-1 3441-3350, 3055, 3038, 3031, 2964, 2956, 2945, 2887, 2853, 2795, 1677, 1610, 1478, 1466, 1454, 1437, 1367, 1346, 1304, 1293, 1281, 1250, 1203, 1190, 1177, 1139, 1120, 1099, 1079, 1052, 1027, 1019, 983, 841, 813, 792, 771, 749, 700, 666; NMR (270 MHz, CDCl3) H 0.13-(-0.06) (m, 18 H), 0.94-0.83 (m, 2 H), 1.29-1.05 (m, 8 H), 1.70-1.58 (m, 2 H), 2.16-1.92 (m, 4 H), 2.65-2.34 (m, 12 H), 3.16-2.83 (m, 4 H), 3.85-3.55 (m, 12 H), 4.13 (d, *J* 13, 2 H), 6.90-6.81 (m, 4 H), 7.48-7.03 (m, 18 H), 7.81-7.63 (m, 4 H), 8.94 (d, *J* 8, 2 H); MS (EI) *m/z*  677 (0.1%), 676 (0.6), 675 (2), 674 (M+, 5), 541 (2), 489 (3), 461 (5), 460 (17), 412 (2), 374 (10), 373 (73), 332 (5), 301 (5), 288 (3), 261 (3), 238 (3), 229 (11), 228 (11), 225 (2), 214 (3), 206 (3), 198 (12), 195 (3), 194 (5), 180 (7), 173 (5), 171 (4), 168 (10), 167 (7), 155 (6), 154 (5), 149 (6), 143 (6), 126 (4), 115 (4), 107 (5), 103 (4), 92 (11), 91 (100), 75 (10), 73 (37), 68 (11), 65 (8).

**4,2'-PREF and 4,2’-PARF Methyl 3-Benzyl-1,2,3,3a,4,5-hexahydro-4[2-(*R*)-(*tert-*butyldimethylsilyloxy)-2-(tosyloxymethyl)propyl]-7H-pyrrolo(2,3-d)carbazole-6-carboxylate** **(170a/b)**. The reaction flask was rinsed with concentrated ammonium hydroxide and dried overnight. A solution of N-benzylindoloazepine **61**  (1.096 g, 3.28 mM, 1.0 equiv.) and 1.44 g (3.61 mM, 1.1 equiv.) of aldehyde **168** in 45 cm3  of dry toluene was heated at reflux for 10 h. Some azepine still remained, but no aldehyde could then be detected by TLC. Concentration and chromatography on 100 g of silica gel with ethyl ether/pentane 1:5, gave 1.66 g (65%) of the title products as a colorless foam and a light yellow foam (0.1962 g). If a yellow foam was obtained from chromatography, a second gravity column ( eluted with CH2Cl2/Pentane 1:2) was used to eliminate any unreacted aldehyde. For the enantiomeric mixture: TLC (SiO2, ether/pentane 1:1) *Rf =* 0.82 (blue with yellow center, which fades quickly to purple with yellow center, CAS); UV (EtOH) max/nm 329, 298, 222, 199; IR (KBr) max/cm-1 3389, 3378, 3369, 3059, 3029, 2951, 2929, 2856, 2795, 1678, 1611, 1465, 1437, 1364, 1281, 1250, 1202, 1190, 1177, 982, 835, 813, 774, 746, 700, 668, 555; NMR (270 MHz, CDCl3) H0.84-(-0.04) (m, 12 H), 0.82 (s, 18 H), 1.42-1.05 (m, 8 H), 1.69-1.61 (m, 2 H), 2.25-1.93 (m, 4 H), 2.65-2.36 (m, 10 H), 3.02-2.84 (m, 4 H), 3.88-3.15 (m, 14 H), 4.24-4.08 (m, 2 H), 6.96-6.83 (m, 4 H), 7.55-7.06 (m, 18 H), 7.74-7.69 (m, 4 H), 8.97-8.92 (br.s, 2 H); MS (EI) *m/z* 717 (2%), 716 (M+, 3), 659 (4), 531 (2), 504 (3), 503 (8), 502 (2), 374 (23), 373 (100), 343 (6), 332 (10), 290 (3), 261 (7), 238 (7), 229 (23), 228 (23), 227 (8), 214 (5), 210 (5), 196 (4), 195 (5), 194 (6), 180 (5), 168 (13), 167 (7), 159 (6), 155 (5), 149 (5), 115 (5), 105 (4), 97 (9), 91 (71), 83 (8), 73 (20), 57 (11).

**Coupling Reaction of Vindoline and** **4,2'-PREF and 4,2’-PARF Methyl 3-Benzyl-1,2,3,3a,4,5-hexahydro-4[2-(*S*)-(trimethylsilyloxy)-2-(tosyloxymethyl)propyl]-7H-pyrrolo(2,3-d)carbazole-6-carboxylate** **(169a/b);** **Formation of Vindolinylindoloazonines 171a/b**. A solution of 0.763 g (1.13 mM, 1.0 equiv.) of the tetracycles **169a/b** in 15 cm3  of dry dichloromethane and 0.237 cm3  (1.70 mM, 1.5 equiv.) of triethylamine was cooled to 0 oC and 0.264 cm3  of *tert*-butyl hypochlorite (2.27 mM, 2.0 equiv.) added to this stirred solution. After 5 min. the reaction mixture was poured into 50 cm3  of distilled water and extracted with 4  30 cm3  of dichloromethane. The organic extracts were dried over magnesium sulfate and concentrated in vacuum at 40 oC to 0.950 g.

The chlorindolenine mixture (0.950 g, 1.13 mM, 1.0 equiv.) was dissolved in 10 cm3  of dry acetone and 0.401 g of solid vindoline (0.878 mM, 0.775 equiv.) was added. The heterogeneous mixture was stirred at 0 oC under nitrogen for 15 min. Tetrafluoroboric acid (0.275 g, 0.250 cm3  , 1.70 mM, 1.5 equiv.) was added, followed after a few minutes by silver tetrafluoroborate (0.331 g, 1.70 mM, 1.5 equiv.), dissolved in 2 cm3  of dry acetone. The heterogeneous mixture was stirred for 15 min in partial darkness, then poured into 50 cm3  of a solution of 10% ammonium hydroxide in brine, extracted with 3  40 cm3  of dichloromethane, dried over magnesium sulfate, and concentrated in vacuum at 40 oC to 1.300 g.

The diastereomeric imine mixture was then subjected to a reductive cleavage with 0.611 g of potassium borohydride (0.0113 mM, 10 equiv.) in 20 cm3  of glacial acetic acid. The borohydride was added to the stirring brownish-orange solution at room temperature over 30 min. The yellow solution was poured into a stirring slurry of conc. ammonium hydroxide (100 cm3  ) and crushed ice. The mixture was extracted with 3  40 cm3  of dichloromethane and the organic extracts were dried over magnesium sulfate. After concentration, the reaction product was chromatographed on a 4 mm silica gel plate, with application in 4 cm3  of dichloromethane, followed by elution with ethyl acetate. The reaction yield was 58% (based on vindoline used).

For the less polar amino tosylate **171a**: TLC (SiO2, EtOAc) *Rf =* 0.58 (purple, CAS); UV (EtOH) max/nm295, 285, 257, 224, 211, 194; IR (KBr) max/cm-1 3362-3496, 2745-3044, 1741, 1460, 1379, 1248, 1227, 1190, 1177, 1152, 1130, 1120, 1109, 1096, 1041, 977, 842, 816, 739; NMR (270 MHz, CDCl3) H 0.10-(-0.24) (m, 9 H), 0.93-0.77 (m, 6 H), 2.14 (s, 3 H), 2.45 (s, 3 H), 2.76 (s, 3 H), 3.63 (s, 3 H), 3.84 (d, *J* 9, 6 H), 5.33 (d, *J* 8, 1 H), 5.52 (s, 1 H), 5.86 (dd, *J* 10, 1 H), 6.21 (s, 1 H), 6.83 (s, 1 H), 7.45-7.02 (m, 11 H), 7.71 (d, *J* 8, 2 H), 8.03 (br.s, 1 H), 9.92 (br.s, 1 H); NMR (67.9 MHz, CDCl3) C2.5, 8.5, 21.0, 21.5, 25.3, 25.7, 29.6, 30.9, 32.8, 38.0, 38.3, 42.9, 44.6, 45.1, 50.3, 52.0, 52.1, 53.3, 53.6, 55.7, 56.0, 59.1, 64.6, 66.1, 74.6, 75.0, 79.7, 83.5, 94.5, 110.4, 115.4, 118.1, 118.9, 121.6, 122.0, 123.5, 124.3, 124.7, 126.5, 127.8, 128.0, 128.1, 128.3, 129.4, 129.7, 130.2, 132.2, 133.6, 135.0, 140.3, 144.6, 153.1, 158.0, 170.8, 171.8, 174.8.

For the more polar amino tosylate **171b**: TLC (SiO2, EtOAc) *Rf =* 0.05 (purple, CAS); UV (EtOH) max/nm292, 288, 256, 224, 212, 196; IR (KBr) max/cm-1 3300-3521, 2748 -3043, 1740, 1615, 1497, 1460, 1432, 1369, 1249, 1225, 1189, 1176, 1153, 1096, 1040, 979, 840, 741 cm-1; NMR (270 MHz, CDCl3) H 0.10-0.02 (m, 9 H), 0.58-0.35 (m, H), 1.49-0.80 (m, 9 H), 2.00-1.53 (m, 2 H), 2.58-2.01 (m, 10 H), 3.10-2.63 (m, 4 H), 3.96-3.22 (m, 20 H), 5.31 (d, *J* 8, 1 H), 5.54 (s, 1 H), 5.87 (dd, *J* 9, 1 H), 6.01 (s, 1 H), 8.18-7.73 (m, 15 H), 9.75 (br.s, 1 H); NMR (67.9 MHz, CDCl3) C2.4, 8.3, 21.0, 21.6, 25.2, 26.3, 29.7, 30.8, 33.7, 38.4, 43.1, 44.7, 50.8, 51.4, 52.1, 52.3, 53.4, 54.2, 55.7, 58.8, 64.6, 64.7, 66.9, 75.0, 75.9, 79.6, 83.7, 94.5, 110.3, 118.2, 118.7, 121.8, 124.0, 124.1, 128.0, 128.2, 129.0, 129.7, 129.8, 130.4, 133.7, 134.9, 140.4, 144.4, 153.2, 158.6, 170.5, 171.9, 176.1

**Coupling Reaction of Vindoline and** **4,2'-PREF and 4,2’-PARF Methyl 3-Benzyl-1,2,3,3a,4,5-hexahydro-4[2-(*R*)-(dimethyl-*tert-*butyllsilyloxy)-2-(tosyloxymethyl)propyl]-7H-pyrrolo(2,3-d)carbazole-6-carboxylate** **(170a/b);** **Formation of Vindolinylindoloazonines 172a/b**. A solution of 0.403 g (0.563 mM, 1.0 equiv.) of the tetracycles **170a/b** in 10 cm3  of dry dichloromethane and 0.084 g (0.118 cm3  , 1.5 equiv.) of triethylamine was cooled to 0C under nitrogen. Addition of 0.122 g of *tert*-butyl hypochlorite (1.13 mM, 2.0 equiv.) created a yellowish solution. After 8 min this was poured into 50 cm3  of distilled water and extracted with 4  30 cm3  of dichloromethane. The organic extracts were dried over magnesium sulfate and concentrated to 0.533 g. TLC (SiO2, EtOAc) *Rf*= 0.77 (orange brown, CAS).

The chlorindolenine (0.533 g, 1.0 equiv.) was dissolved in 10 cm3  of dry acetone and 0.199 g of solid vindoline (0.436 mM, 0.775 equiv.) was added. The heterogeneous mixture was stirred at -10 oC under nitrogen for 10 min. Tetrafluoroboric acid (0.124 g, 0.844 mM, 1.5 equiv.) was added to the stirred mixture, folowed after a few minutes by silver tetrafluoroborate ( 0.164 g, 0.844 mM, 1.5 equiv.). After stirring in partial darkness for 15 min the reaction mixture was poured into 50 cm3  of 10% ammonium hydroxide in brine and extracted with 3  40 cm3  of dichloromethane. The extracts were dried over magnesium sulfate and concentrated in vacuum at 40 oC to 0.750 g.

The imine mixture was dissolved in 20 cm3  of glacial acetic acid. At room temperature 0.304 g of potassium borohydride (10 equiv., 5.62 mM) was added over a period of 45 min with rapid stirring. The resulting yellow solution was poured onto a stirring solution of conc. ammonium hydroxide (100 cm3  ) and crushed ice. The mixture was extracted with 3  50 cm3  of dichloromethane, dried over magnesium sulfate, concentrated and chromatographed by centrifugal chromatography on a 2 mm silica gel plate, with application of the mixture in 4 cm3  of dichloromethane, followed by elution with ether/acetone/Et3N 100:10:1. A 71% yield of the diastereomers **176a/b** was obtained.

For the less polar amino tosylate dimer (**172a**): TLC (SiO2, EtOAc) *Rf* = 0.73 (tan, CAS); UV (EtOH) max/nm 298, 289, 260, 212, 199; IR (KBr) max/cm-1 3668-3381, 3083-2739, 1741, 1615, 1501, 1461, 1369, 1248, 1189, 1177, 1151, 1133, 1120, 1042, 979, 835, 667, 554, 464; NMR (270 MHz, CDCl3) H-0.10 (s, 6 H), 0.70 (s, 9 H), 0.98-0.85 (m, 6 H), 2.13 (s, H), 2.45 (s, 3 H), 2.74 (s, 3 H), 3.63 (s, 3 H), 3.83 (d, *J* 5, 6 H), 5.34 (d, *J* 1, 1 H), 5.53 (s, 1 H), 5.87 (dd, *J* 10, 1 H), 6.20 (s, 1 H), 6.80 (s, 1 H), 7.57-6.95 (m, 11 H), 7.71 (d, *J* 8, 2 H), 8.05-7.93 (br.s, 1 H), 9.96-9.84 (br.s, 1 H); NMR (67.9 MHz, CDCl3) C-2.2, -2.0, 8.6, 18.1, 21.2, 21.7, 24.8, 25.9, 29.7, 30.9, 31.2, 32.9, 37.5, 38.6, 42.7, 44.6, 45.5, 50.3, 52.3, 53.4, 53.7, 55.8, 58.7, 65.1, 65.9, 74.5, 74.9, 79.7, 83.4, 90.5, 110.5, 115.7, 118.1, 118.9, 122.1, 123.4, 124.5, 126.7, 127.8, 128.1, 129.4, 129.8, 130.1, 131.8, 133.3, 134.9, 140.4, 144.7, 153.2, 157.9, 158.4, 171.0, 171.8, 174.9; MS (EI) *m/z*  912 (0.6%), 911 (1), 881 (0.6), 880 (1), 852 (0.5), 790 (0.9), 789 (2), 279 (3), 262 (4), 229 (14), 222 (5), 220 (18), 206 (23), 205 (73), 191 (9), 165 (10), 149 (13), 147 (6), 128 (20), 115 (19), 107 (37), 105 (14), 92 (22), 91 (100), 89 (20), 86 (30), 84 (13), 77 (11), 75 (11), 74 (12), 65 (12), 59 (11), 58 (68), 57 (24), 56 (11), 55 (16).

For the more polar amino tosylate **172b**: TLC (SiO2, EtOAc) *Rf* = 0.54 (tan, CAS); UV (EtOH) max/nm295, 289, 284, 262, 226, 213-215, 199; IR (KBr) max/cm-13455-3396, 3060-2806, 1741, 1497, 1461, 1369, 1249, 1226, 1190, 1177, 1151, 1043, 1004, 980, 836, 738, 700, 668 cm-1; NMR (270 MHz, CDCl3) 0.03-0.02 (br.s, 6 H), 0.99-0.73 (m, 15 H), 2.12 (s, 3 H), 2.49 (s, 3 H), 2,73 (s, 3 H), 3.63 (s, 2 H), 3.83 (d, *J* 11, 6 H), 5.28 (d, *J* 11, 1 H), 5.54 (s, 1 H), 5.86 (dd, *J* 5, 1 H), 6.03 (s, 1 H), 7.44-7.04 (m, 11 H), 7.90-7.70 (m, 2 H), 8.20-8.00 (br.s, 1 H), 9.85-9.50 (br.s, 1 H); NMR (67.9 MHz, CDCl3) C-2.3, 8.2, 14.3, 21.0, 21.6, 25.7, 26.2, 29.6, 30.6, 33.9, 38.6, 42.8, 44.7, 50.6, 51.2, 52.3, 53.2, 53.9, 55.7, 58.5, 66.5, 72.3, 74.6, 75.5, 76.2, 79.5, 83.6, 94.6, 110.3, 118.0, 118.6, 121.8, 123.8, 124.2, 126.7, 127.9, 128.2, 129.8, 130.1, 134.7, 140.2, 170.6, 171.8, 174.0; MS (EI) *m/z*  790 (0.04%), 789 (0.1), 779 (0.2), 568 (0.1), 469 (0.1), 456 (0.1), 397 (0.2), 395 (0.7), 381 (0.1), 374 (0.3), 361 (0.3), 332 (0.2), 331 (0.2), 330 (0.3), 324 (0.2), 309 (0.2), 296 (0.2), 289 (0.3), 287 (0.3), 282 (0.5), 281 (0.2), 279 (0.4), 271 (0.3), 269 (0.5), 267 (0.2), 262 (0.3), 261 (0.6), 260 (0.2), 254 (0.4), 240 (0.7), 231 (1), 230 (2), 229 (14), 205 (9), 172 (2), 165 (1), 150 (1), 149 (5), 145 (2), 135 (3), 134 (1), 132 (9), 128 (10), 126 (29), 115 (2), 111 (2), 101 (22), 91 (88), 86 (76), 75 (100), 58 (31).

**7*S*,5*R*,2’*S*-Methyl 3-Benzyl-1,2,3,4,5,6,7,8-octahydro-5-[(2-methyl-2,3-oxo)propyl]azonino-(6,7-b)-indole-7-(15-vindolinyl)-7-carboxylate (173a)**. **a:** To the less polar trimethylsilyloxy tosyloxy indoloazonine **171a** (0.084 g, 0.074 mM, 1.0 equiv.), stirred in 15 cm3  of dry tetrahydrofuran at room temperature, 0.221 cm3  of tetrabutylammonium fluoride was added all at once. No starting material remained after 15 min. The mixture was washed once with 75 cm3  of satd. sodium bicarbonate and extracted with 4  30 cm3  of EtOAc. The more polar product was purified by centrifugal chromatography on a 1 mm silica gel plate, eluted with ethyl acetate, to provide 0.056 g (85%) of product. TLC (SiO2, EtOAc) *Rf* = 0.35 (dark purple, CAS); UV (EtOH) max/nm 295, 287, 258, 225, 211, 195; IR (KBr) max/cm-1 3350-3499, 2684-3091, 1741, 1615, 1501, 1460, 1224, 1227, 1042, 738; NMR (270 MHz, CDCl3) H 0.94-0.82 (m, 6 H), 1.77-1.16 (m, 9 H), 2.30-1.80 (m, 5 H), 2.83-2.34 (m, 11 H), 3.36-3.00 (m, 4 H), 3.87-3.56 (m, 12 H), 5.31 (d, *J* 9, 1 H), 5.43 (s, 1 H), 5.82 (dd, *J* 10, 1 H), 6.12 (s, 1 H), 7.38-6.81 (m, 10 H), 8.06 (br.s, 1 H), 9.79 (br.s, 1 H); NMR (67.9 MHz, CDCl3) C8.3, 8.4, 20.6, 21.1, 21.1, 25.4, 30.8, 30.9, 33.6, 37.5, 38.7, 42.7, 44.7, 49.4, 50.0, 52.1, 52.3, 53.1, 53.2, 53.3, 55.3, 55.4, 55.8, 56.3, 60.0, 60.1, 63.2, 65.2, 65.2, 65.4, 76.4, 79.8, 83.4, 94.2, 110.4, 114.7, 114.7, 118.1, 118.9, 119.0, 122.0, 122.1, 122.2, 122.3, 122.9, 124.5, 125.2, 125.3, 126.4, 127.7, 128.0, 129.4, 130.0, 132.2, 134.9, 140.0, 152.8, 158.1, 170.8, 171.5, 174.8.

**b**: The less polar TBDMS tosyl compound **172a** (0.231 g, 0.197 mM, 1.0 equiv.) in 30 cm3  of dry tetrahydrofuran and 0.59 cm3  (0.59 mM, 3.0 equiv.) of tetrabutylammonium fluoride in 1.0 M THF was heated at reflux for 1.25 h, when no starting material was evident by TLC (SiO2, EtOAc). The cooled mixture was partitioned between 20 cm3  of dichloromethane and twice 20 cm3  of satd. sodium bicarbonate. The two aqueous portions were extracted with 20 cm3  of dichloromethane. The combined dichloromethane extracts were washed with1  50 cm3  of brine, dried over magnesium sulfate, and concentrated to dryness. Centrifugal chromatography on a 4 mm silica gel plate, eluted with 2% MeOH/CH2Cl2, gave 0.127 g of a white foam (73%). TLC (SiO2, EtOAc) *Rf* = 0.51 (purple, CAS); UV (EtOH) max/nm 297, 288, 260, 226, 212, 199; IR (KBr) max/cm-1 3686-3386, 3117-2512, 1742, 1614, 1501, 1460, 1432, 1370, 1242-1226, 1175, 1157, 1091, 1042, 907, 735; NMR (270 MHz, CDCl3) H0.88-0.66 (m, 6 H), 2.17-1.23 (m, 14 H), 2.67-2.34 (m, 9 H), 3.82-2.78 (m, 19 H), 5.31 (d, *J* 11, 1 H), 5.43 (s, 1 H), 5.84 (dd, *J* 10, 1 H), 6.13 (s, 1 H), 7.39-6.73 (m, 10 H), 8.07 (br.s, 1 H), 9.80-9.79 (br.s, 1 H); NMR (67.9 MHz, CDCl3) 8.4, 21.1, 25.4, 29.6, 30.7, 33.6, 37.4, 38.7, 42.6, 42.7, 44.7, 44.3, 49.9, 52.1, 52.2, 53.0, 53.3, 55.4, 55.8, 56.3, 60.0, 63.2, 65.1, 79.7, 83.3, 94.2, 95.7, 100.8, 110.4, 114.8, 118.2, 118.8, 121.9, 122.7, 124.5, 125.3, 126.4, 127.7, 128.0, 129.3, 130.0, 132.1, 134.8, 140.0, 152.8, 158.0, 170.8, 171.9, 174.8; MS (EI) *m/z*  889 (2%), 888 (5), 887 (6), 828 (5), 796 (6), 789 (5), 729 (5), 728 (10), 636 (10), 553 (8), 540 (7), 527 (10), 469 (9), 430 (6), 380 (9), 371 (10), 366 (6), 297 (7), 283 (6), 282 (29), 279 (10), 273 (14), 261 (33), 257 (6), 230 (7), 224 (7), 222 (10), 216 (19), 210 (6), 204 (12), 202 (9), 188 (9), 167 (5), 149 (16), 144 (7), 135 (49), 134 (18), 125 (8), 122 (18), 121 (18), 111 (21), 109 (10), 107 (15), 99 (12), 97 (60), 95 (12), 91 (55), 86 (28), 84 (53), 71 (37.2), 69 (100), 57 (53), 55 (79).

**7*R*,5*S*,2’*S*-Methyl 3-Benzyl-1,2,3,4,5,6,7,8-octahydro-5-[(2-methyl-2,3-oxo)propyl]azonino-(6,7-b)-indole-7-(15-vindolinyl)-7-carboxylate (173b)**. **a**: The more polar TMS tosylate **171b** (0.0443 g, 0.039 mM, 1.0 equiv.) was stirred in 10 cm3  of dry tetrahydrofuran at room temperature under nitrogen for 15 min with 0.116 cm3  of tetrabutylammonium fluoride (0.116 mM, 3.0 equiv.). No starting material remained after 15 min. The mixture was washed once with 75 cm3  of saturated sodium bicarbonate and extracted with 4  30 cm3  of EtOAc. The crude product (39 mg) was purified by centrifugal chromatography on a 1 mm silica gel plate, eluted with ether/toluene/diethylamine/methanol 100:5:5:5 (epoxide sprays tan with CAS). Two less polar compounds and 31 mg of the more polar epoxide (91%) were obtained. 1H NMR showed a small amount of diethylamine with the epoxide). TLC (SiO2, EtOAc) *Rf* = 0.35 (purple, CAS); UV (EtOH) max/nm 287, 253, 222, 211, 195; IR (KBr) max/cm-1 3576-3304, 2993-2648, 1740, 1615, 1499, 1460, 1432, 1371, 1245, 1236, 1226, 1041, 737 cm-1; NMR (270 MHz, CDCl3) H 0.40 (t, *J* 7 , 3 H), 0.74 (s, 3 H), 1.65-0.96 (m, 9 H), 2.00 (s, 3 H), 2.51-2.01 (m, 8 H), 2.86-2.53 (m, 5 H), 3.07-2.97 (m, 1 H), 3.73-3.21 (m, 16 H), 5.18 (d, *J* 10, 1 H), 5.39 (s, 1 H), 5.75 (dd, *J* 10, 1 H), 6.06 (s, 1 H), 6.81 (s, 1 H), 7.38-7.00 (m, 9 H), 8.02-7.90 (br.s, H), 9.73-9.64 (br.s, 1 H); NMR (67.9 MHz, CDCl3) C8.2, 14.0, 20.7, 21.0, 23.0, 23.8, 26.4, 29.0, 30.4, 30.7, 32.4, 35.0, 38.6, 38.8, 41.8, 42.9, 45.2, 50.5, 50.7, 52.2, 52.3, 53.5, 54.1, 55.5, 56.0, 57.9, 65.0, 66.4, 68.2, 76.0, 79.7, 83.8, 93.8, 110.2, 118.3, 119.0, 121.3, 122.2, 123.8, 124.1, 124.4, 126.7, 128.2, 128..3, 128..8, 129..2, 130.1, 130.8, 131.9, 132.6, 134.5, 135.0, 140.0, 153.3, 158.3, 170.5, 171.7, 174.4.

**b**: The more polar TBDMS tosylate **172b** (0.084 g, 0.072 mM, 1.0 equiv.) in 15 cm3  of dry tetrahydrofuran and 0.22 cm3  (0.22 mM, 3.0 equiv.) of tetrabutylammonium fluoride (1.0 M in THF) was heated at reflux for 1.5 h, when no starting material was seen by TLC (SiO2, ethyl acetate). At room temperature, 20 cm3  of dichloromethane was added and the organic layer was washed twice with 20 cm3  of saturated sodium bicarbonate. The two aqueous portions were extracted with one 20 cm3  portion of dichloromethane. The combined dichloromethane extracts were then washed with1  50 cm3  of brine, dried over magnesium sulfate, and concentrated to dryness. Centrifugal chromatography on a 2 mm silica gel plate, eluted with 3% MeOH/CH2Cl2 gave 0.092 g of a white foam (77%). TLC (SiO2, EtOAc) *Rf* = 0.46 (tan, CAS); UV (EtOH) max/nm295, 291, 256, 226, 212, 199; IR (KBr) max/cm-1 3691-3356, 3053 -2798, 1741, 1615, 1499, 1460, 1433, 1372, 1246-1226, 1042, 740; NMR (270 MHz, CDCl3) H 0.40 (t, *J* 7, 3 H), 0.94-0.65 (m, 4 H), 1.39-0.95 (m, 3 H), 1.69-1.40 (m, 5 H), 2.86-1.90 (m, 15 H), 4.06-2.95 (m, 18 H), 5.18 (d, *J* 11, 1 H), 5.39 (s, 1 H), 5.77 (dd, *J* 10, 1 H), 6.07 (s, 1 H), 6.81 (s, 1 H), 7.38-6.97 (m, 9 H), 7.98-7.97 (br.s, 1 H), 9.68 (br.s, 1 H); NMR (67.9 MHz, CDCl3) C 8.3, 20.6, 21., 26.4, 29.7, 30.6, 32.0, 35.1, 38.7, 41.8, 42.7, 45.3, 50.4, 50.6, 52.3, 53.5, 54.0, 55.5, 55.6, 56.1, 57.7, 65.1, 66.2, 79.6, 83.8, 87.5, 93.7, 110.3, 116.1, 118.3, 119.1, 121.2, 122.3, 123.7, 124.2, 124.4, 126.8, 128.2, 129.2, 130.1, 131.7, 134.9, 140.1, 153.3, 158.2, 170.6, 171.7, 174.3; MS (EI) *m/z* 889 (0.1%), 888 (0.3), 887 (0.5), 828 (0.3), 796 (0.4), 789 (0.3), 728 (0.3), 636 (0.3), 630 (0.2), 540 (0.8), 538 (0.3), 527 (0.7), 469 (0.6), 430 (0.7), 417 (0.3), 380 (0.9), 371 (0.9), 369 (0.3), 366 (0.4), 359 (0.4), 355 (0.4), 332 (0.5), 295 (1), 282 (2), 281 (1), 261 (2 ), 242 (1), 207 (2), 185 (15), 182 (2), 149 (8), 142 (100), 135 (5), 128 (7), 126 (12), 121 (3), 115 (3), 111 (4), 108 (5), 105 (8), 100 (22), 91 (38), 84 (16), 77 (10), 71 (11), 58 (17), 57 (33).

**20'-Deethyl-20’-deoxy-20’-methyl-20’-(trimethylsilyloxy)-vinblastine (165a)**. A solution of 0.061 g (0.057 mM) of the less polar TMS tosylate **171a** in 20 cm3  of dry methanol was stirred at reflux for 34 h and concentrated. TLC showed a slight amount of starting material remained. After triturating the reaction mixture with anhydrous ether, 0.053 g of the quaternary salt **163a** was obtained. TLC (SiO2, EtOAc) *Rf* = 0.0 ( dark purple fades to dark brown-black, CAS).

The white salt (0.053 g) was stirred in 5 cm3  of dry methanol and cooled to 0 oC. After 15 min 6 mg of 10% palladium on carbon was added and the mixture hydrogenated for 2.5 h at room temperature. Filtration through Celite, continuous rinsing of the Celite with small portions of dry methanol, and concentration gave 0.048 g of material that was chromatographed on a 1 mm centrifugal Chromatotron silica gel plate, eluted with 4% MeOH/CH2Cl2, to yield 33 mg of the silyloxy VLB congener **169a** (67%). A more polar atropisomer was also isolated from the reaction mixture (14 mg). TLC (SiO2, 10% MeOH/CH2Cl2) *Rf* = 0.44 ( red-brown, CAS); UV (EtOH) max/nm 293, 285, 256, 224, 211, 193; IR (KBr) max/cm-1 3406-3495, 2834-3004, 1742, 1616, 1500, 1458, 1247, 1226, 1194, 1144, 1040, 1014, 840; NMR (270 MHz, CDCl3) H0.35-0.27 (m, 11 H), 1.12 (s, 3 H), 2.11 (s, 3 H), 2.71 (s, 3 H), 3.62 (s, 3 H), 5.47 (s, 6 H), 5.85 (dd, *J* 11, 1 H), 6.11 (s, 1 H), 6.62 (s, 1 H), 7.26-7.06 (m, 4 H), 7.52 (d, *J* 7, 1 H), 8.01 (s, H), 9.92 (s, H); NMR (67.9 MHz, CDCl3) 2.7, 8.3, 21.0, 28.7, 30.9, 33.9, 38.4, 42.9, 44.6, 47.0, 50.4, 50.6, 52.1, 52.1, 53.4, 55.9, 56.3, 65.9, 66.7, 70.6, 79.7, 83.6, 94.5, 109.5, 110.4, 117.5, 118.4, 118.8, 118.8, 121.8, 121.8, 121.8, 122.2, 123.0, 123.7, 124.4, 129.6, 130.2, 131.4, 135.3, 152.6, 158.3, 170.8, 171.8, 175.0; MS (EI) *m/z*  868 (M+, 0.4%), 629 (0.6), 601 (0.6), 585 (0.6), 570 (0.3), 535 (0.6), 527 (0.5), 495 (4), 369 (4), 355 (6), 341 (5), 339 (4), 326 (6), 295 (9), 282 (18), 281 (6), 279 (5), 273 (6), 272 (6), 229 (4), 221 (13), 214 (15), 213 (16), 212 (100), 210 (6), 207 (4), 200 (7), 199 (8), 198 (30), 196 (5), 188 (5), 184 (7), 182 (5), 171 (9), 170 (6), 167 (18), 158 (10), 157 (8), 149 (43), 147 (6), 144 (9), 135 (45), 130 (15), 127 (4), 124 (13), 123 (9), 122 (33), 121 (22), 115 (9), 113 (7), 111 (13), 107 (17), 103 (13), 97 (18), 95 (17), 93 (20), 91 (15), 86 (21), 84 (44), 83 (50), 81 (24), 75 (33), 73 (74), 69 (38), 67 (16), 58 (15), 55 (52), 51 (19).

**20'-Deethyl-20’-deoxy-20’-methyl-20’-[(dimethyl-*tert*-butylsilyl)oxy]-vinblastine (166a)**. The less polar TBDMS tosylate **172a** (0.111 g, 0.094 mM) in 3 cm3  of dry methanol was sealed in a glass tube and heated at 115-120 oC for 19 h. Concentration and trituration gave 0.096 g of the quaternary salt **164a**.

The white salt (0.096 g) in 10 cm3  of dry methanol and 16 mg of 10% Pd/C was hydrogenated for 3 h at room temperature. Filtration through Celite, followed by rinsing of the Celite plug with small portions of dry methanol, concentration and chromatography on a 1 mm centrifugal Chromatotron silica gel plate, eluted with 4% MeOH/CH2Cl 2,gave 0.062 g (72%) of TBDMS-VLB congener (**170a**). TLC (SiO2, acetone/pentane 1:2) *Rf* = 0.64 (tan, CAS); UV (EtOH) max/nm296, 289, 258, 227, 215; IR (KBr) maxcm-1 3469-3439, 2954, 2927, 2908, 2879, 2855, 1744, 1616, 1504, 1458, 1432, 1371, 1247, 1228, 1144, 1130, 1039, 1018, 835, 740; NMR (270 MHz, CDCl3) H0.23 (m, 6 H), 0.80 (t, *J* 7, 3 H), 0.99 (s, 9 H), 1.89-1.19 (m, 7 H), 2.27-2.10 (m, 5 H), 2.48-2.39 (m, 1 H), 2.87-2.63 (m, 7 H), 3.40-3.09 (m, 6 H), 3.94-3.61 (m, 14 H), 5.29 (d, *J* 10, 1 H), 5.47 (s, 1 H), 5.84 (dd, *J* 10, 1 H), 6.11 (s, 1 H), 6.60 (s, 1 H), 7.27-7.07 (m, 4 H), 7.52 (d, *J* 7, 1 H), 8.06 (s, 1 H), 9.89-9.88 (br.s, 1 H); NMR (67.9 MHz, CDCl3) C-1.6, -1.3, 8.4, 18.7, 21.1, 25.9, 26.6, 28.5, 29.8, 30.4, 30.8, 34.4, 38.5, 42.8, 44.6, 46.9, 47.0, 50.4, 52.3, 53.3, 55.7, 56.0, 65.7, 66.2, 71.1, 79.7, 83.5, 94.5, 110.6, 118.4, 118.5, 118.8, 120.4, 121.0, 122.2, 122.2, 122.9, 123.7, 124.6, 130.1, 130.1, 130.2, 131.5, 135.1, 152.7, 158.3, 170.9, 171.9, 174.0; MS (EI) *m/z*  911 (11), 910 (M+, 6%), 880 (10), 879 (4), 852 (7), 752 (6), 672 (4), 496 (13), 469 (6), 455 (8), 389 (4), 380 (10), 368 (6), 341 (6), 325 (7), 310 (5), 282 (28), 272 (9), 254 (100), 240 (41), 226 (8), 214 (8), 202 (5), 200 (24), 198 (5), 188 (10), 184 (23), 156 (8), 144 (10), 135 (53), 124 (14), 122 (61), 115 (23), 111 (10), 97 (14), 95 (14), 93 (28), 91 (8), 89 (21), 85 (11), 83 (37), 81 (18), 75 (96), 73 (88), 58 (53).

**20'-Deethyl-20’-deoxy-20’-methyl-20’-[(dimethyl-*tert*-butylsilyl)oxy]-20’-epi-vincovaline (166b)**. The more polar TBDMS tosylate **172b** (0.101 g, 0.086 mM) in 3 cm3  of dry methanol was heated in a sealed glass tube at 115-120 oC for 29 h. Concentration ond trituration with anhydrous ether produced 0.089 g of a white quaternary salt **164b**.

The salt (0.089 g) in 10 cm3  of dry methanol was hydrogenolyzed with 16 mg of 10% Pd/C for 3 h at room temperature. Filtration through Celite, followed by rinsing of the Celite plug with small portions of dry methanol, concentration and chromatography on a 1 mm centrifugal Chromatotron silica gel plate, eluted with 4% MeOH/CH2Cl2, gave 0.050 g (63%) of the title product. TLC (SiO2, acetone/pentane 1:2) *Rf* = 0.46 (red-brown, CAS); UV (EtOH) max/nm 297, 293, 258, 25, 227, 213; IR (KBr) max/cm-1 3468, 2958, 2930, 2881, 2854, 1743, 1501, 1459, 1371, 1248, 1225, 1191, 1121, 1047, 1024, 1005, 835, 773, 740; NMR (270 MHz, CDCl3) H0.03 (m, 6 H), 0.42 (t, *J* 7, 3 H), 0.94-0.74 (m, 10 H), 1.97-1.00 (m, 1 H), 1.70-1.21 (m, 7 H), 2.27-2.05 (m, 4 H), 2.55-2.38 (m, 3 H), 2.82-2.65(m, 4 H), 3.04-2.88 (m, 2 H), 3.49-3.21 (m, 4 H), 3.89-3.50 (m, 14 H), 5.26 (d, *J* 10, 1 H), 5.50 (s, 1 H), 5.81 (dd, *J* 9, 1 H), 6.17 (s, 1 H), 6.76 (s, 1 H), 7.28-7.12 (m, 4 H), 7.54 (d, *J* 8, 1 H), 8.05 (s, 1 H), 9.76 (br.s, 1 H); NMR (67.9 MHz, CDCl3) C-2.4, -1.9, 8.3, 18.0, 21.1, 25.9, 27.3, 29.7, 31.0, 31.9, 36.2, 38.7, 42.8, 44.9, 46.7, 48.3, 50.6, 51.0, 52.3, 53.5, 54.1, 55.8, 64.6, 66.9, 72.4, 79.6, 83.8, 94.4, 110.2, 116.7, 118.5, 118.9, 120.8, 122.2, 123.7, 123.9, 129.2, 130.1, 131.9, 134.8, 153.1, 158.1, 170.7, 171.9, 174.5; MS (EI) *m/z*  911 (9%), 910 (M+, 10), 852 (7), 780 (11), 778 (27), 752 (5), 720 (5), 696 (20), 541 (7), 510 (5), 497 (10), 495 (32), 469 (23), 454 (16), 380 (15), 367 (6), 322 (9), 313 (5), 309 (7), 308 (5), 297 (6), 282 (33), 273 (10), 272 (9), 254 (76), 240 (62), 238 (7), 226 (7), 222 (11), 214 (9), 202 (9), 201 (6), 200 (24), 199 (8), 188 (13), 185 (21), 184 (67), 171 (8), 156 (13), 149 (9), 147 (12), 144 (12), 135 (56), 132 (30), 122 (53), 108 (13), 93 (18), 75 (100), 73 (45), 57 (30).

**20'-Methyl-20’deethylvinblastine (27) and Its Atropisomer (162a)**. **Route a**: The epoxide **173a** (10 mg, 0.011 mM) made from the less polar tosylate **171a** in 10 cm3  of dry methanol and 1.5 equiv. of acetic acid (0.013 cm3  was heated at reflux for 12 h, when the reaction was completed as seen by TLC. Concentration and trituration with anhydrous ether gave a salt that was taken up in 3 cm3  of dry methanol . Addition of 2 mg of 10% Pd/C, hydrogenation for 3 h, filtration through a plug of Celite and concentration gave 0.0098 g of material. Centrifugal chromatography, eluted with 10% MeOH/CH2Cl2 (1 mm silica gel plate) yielded 0.0046 g (52%) of the higher energy atropisomer **166a** and 0.0026 g (30%) of the natural conformer **27**.

For **27**: TLC (SiO2, 10% MeOH/CH2Cl2) *Rf* = 0.30 (red brown, CAS); UV (EtOH) max/nm292, 285, 256, 225, 212, 194; IR (KBr) max/cm-1 3279-3620, 2769-2998, 1742, 1617, 1505, 1458, 1431, 1371, 1248, 1227, 1192, 1043, 732; NMR (270 MHz, CDCl3) 0.82 (t, *J* 7, 3 H), 1.08 (br.s, 1 H), 1.53-1.23 (m, 4 H), 1.98-1.59 (m, 3 H), 2.52-2.06 (m, 6 H), 2.89-2.63 (m, 6 H), 3.47-3.06 (m, 5 H), 3.98-3.52 (m, 13 H), 5.30 (d, *J* 10, 1 H), 5.47 (s, 1 H), 5.85 (dd, *J* 12, 1 H), 6.11 (s, 1 H), 6.63 (s, 1 H), 7.33 -7.07 (m, 4 H), 7.53 (d, *J* 7, 1 H), 8.04 (s, 1 H), 9.90-9.86 (br.s, 1 H); NMR (67.9 MHz, CDCl3) C8.4, 13.6, 20.3, 21.1, 28.9, 29.0, 30.5, 30.9, 31.0, 34.4, 38.4, 42.8, 44.6, 50.4, 50.6, 52.2, 52.3, 53.3, 557, 55.8, 55.9, 56.0, 65.8, 65.9, 68.2, 79.7, 83.5, 94.3, 110.5, 110.6, 118.5, 118.9, 123.7, 123.8, 124.5, 124.6, 129.5, 130.1, 131.6, 135.1, 152.8, 158.2, 170.9, 171.8, 174.8; MS (EI) *m/z*  797 (0.4%), 796 (M+, 1), 765 (1), 738 (2), 637 (1), 558 (1), 530 (0.8), 469 (0.8), 339 (0.8), 282 (2), 281 (2), 223 (1), 185 (8), 171 (2), 170 (1), 167 (2), 160 (1), 158 (0.8), 156 (2), 149 (4), 143 (12), 142 (100), 140 (9), 139 (1), 136 (1), 135 (5), 128 (2), 126. (2), 124 (3), 121 (3), 112 (3), 111 (4), 109 (2), 107 (2), 105 (2), 100 (46), 98 (10), 95 (5), 91 (3), 86 (12), 84 (10), 71 (11), 70 (6), 58 (16), 57 (47), 55 (16), 50 (10).

For **162a**: TLC (SiO2, 20 % MeOH/CH2Cl2) *Rf* = 0.47 (purple, CAS); UV (EtOH)max/nm 304, 288-289, 266, 258, 224, 215, 209, 199; IR (KBr) max/cm-1 3255-3662, 2802-3009, 2544-2731, 1730, 1613, 1497, 1458, 1426, 1368, 1232, 1142, 1103, 1032, 909, 805, 728; NMR (270 MHz, CDCl3) H0.40-0.11 (m, 1 H), 1.51-0.70 (m, 10 H), 1.88-1.52 (m, 2 H), 2.17-1.90 (m, 4 H), 2.89-2.20 (m, 8 H), 4.05-2.90 (m, 18 H), 5.27-5.12 (br.s, H), 5.46-5.41 (br.s, 1 H), 5.84-5.76 (br.s, 1 H), 6.08 (br.s, 1 H), 7.65-6.87 (m, 5 H), 8.84-8.76 (br.s, 1 H), 9.71-9.65 (br.s, 1 H), 11.38-11.28 (br.s, 1 H).

**Route b**: The trimethyl siloxy amine **165a** (18 mg, 0.020 mM), in 10 cm3  of dry tetrahydrofuran and 0.064 cm3  of tetrabutylammonium fluoride, 1 M in THF, (0.064 mM, 3.0 equiv.) was stirred for 45 min when no starting material was seen by TLC (EtOAc). The more polar product was washed with 75 cm3  of satd. sodium bicarbonate, extracted with 4 30 cm3  of ethyl acetate, and the organic extracts were washed with 50 cm3  of brine. Concentration to 0.017 g of material and centrifugal chromatography on a 1 mm silica gel plate, eluted with 10% MeOH/CH2Cl2, gave 0.013 g, (79%) of product **27**.

**20'-Methyl-20’-deethyl-20’- epi-vincovaline (161) and Its Atropisomer (162b).** The epoxide **173b** (0.031 g; 0.034 mM), made from the more polar TMS tosylate **171b**, was heated at reflux in dry MeOH and 1.5 equiv. of acetic acid (0.041 cm3  ) for 21 h. Concentration and trituration with anhydrous ether gave 0.031 g of quaternary salt (*Rf* = 0.00, sprays purple with CAS). This was then taken up in 3 cm3  of dry MeOH and hydrogenated over 10% Pd/C (4 mg) for 3 h. Concentration and centrifugal chromatography (1 mm silica gel plate eluted with 15 % MeOH/CH2Cl2) gave 0.013 g of the higher energy atropisomer **162b** (46%) and 0.0047 g of the lower energy atropisomer **161** (17%). Heating the atropisomer **162b** in toluene at reflux for 11 h gave the title product **161**.

For **161**: TLC (SiO2, 10% MeOH/CH2Cl2) *Rf*= 0.21 (tan, CAS); UV (EtOH) max/nm 289, 255, 222, 209, 195; IR (neat, NaCl) max/cm-1 3503-3276, 2996-2826, 1736, 1607, 1503, 1456, 1421, 1363, 1223, 1246, 1094, 1030; NMR (270 MHz, CDCl3) H0.41 (t, *J* 7, 3 H), 1.20-0.80 (m, 4 H), 1.50-1.21 (m, 4 H), 1.88-1.51 (m, 3 H), 2.56-1.88 (m, 6 H), 3.20-2.63 (m, 6 H), 3.96-3.21 (m, 18 H), 4.22 (d, *J* 9, 1 H), 5.47 (s, 1 H), 5.83 (dd, *J* 8, 1 H), 6.15 (s, 1 H), 6.62 (s, 1 H), 7.45-7.14 (m, 4 H), 7.48 (d, *J* 8, 2 H), 8.70 (br.s, 1 H), 9.68 (br.s, 1 H).

For atropisomer **162b**: TLC (SiO2, 20% MeOH/CH2Cl2) *Rf* = 0.45 (purple, CAS); UV (EtOH) max/nm 338, 300, 280, 258, 220, 212, 195; IR (neat, NaCl) max/cm-13532-3246, 2985-2810, 1739, 1617, 1500, 1459, 1432, 1372, 1300, 1249, 1189, 1039, 634 cm-1; NMR (270 MHz, CDCl3) H0.62-0.48 (br.s, 1 H), 0.99-0.83 (m, 3 H), 1.88-0.99 (m, 11 H), 3.29-1.90 (m, 11 H), 4.24-3.32 (m, 18 H), 5.27 (d, *J* 15, 1 H), 5.43 (s, 1 H), 6.08-5.88 (m, 2 H), 7.80-7.02 (m, 5 H), 9.63 (br.s, 1 H), 11.04 (br.s, 1 H).

.
